# Supplementary material for: Temporal cascade of frontal, motor and muscle processes underlying human action-stopping
Source: eLife. 2020 Mar 18;9:e50371. doi: 10.7554/eLife.50371 (PMC7159878; doi:10.7554/eLife.50371)
Supplement: Figure 1—figure supplement 1—source data 1. [file elife-50371-fig1-figsupp1-data1.xlsx]

## Sheet: Sheet1
Figure 1-figure supplement 1 | Mean RTEMG and RTBeh in the Correct Go and Failed Stop trials for study 1 and 2
	Correct Go			Failed Stop
Subject No	RTEMG	RTBeh		RTEMG	RTBeh
1	377.091	516.63		330.417	471.28
2	292.88	429.95		263.947	398.324
3	384.767	541.139		310.672	458.66
4	328.536	430.981		294.644	399.336
5	258.422	392.091		245.95	371.168
6	344.225	499.59		295.452	437.254
7	303.126	457.902		269.842	418.726
8	248.209	417.381		233.781	398.255
9	255.187	398		231.313	371.614
10	365.475	483.82		311.77	436.43
11	269.349	413.371		232.121	369.643
12	374.812	477.197		326.878	436.214
13	449.741	579.355		375.631	504.431
14	305.164	431.517		286.487	413.81
15	433.752	597.524		355.754	527.162
16	395.525	514.37		345.709	468.39
17	486.536	598.032		479.961	591.365
18	341.987	491.029		306.867	453.015
19	433.206	573.382		409.333	549.874
20	490.39	636.694		436.45	591.184
21	291.123	434.015		244.5	385.56
22	233.729	398.243		208.103	361.406
23	229.337	366.041		205.628	342.479
24	232.409	360.193		214.019	339.179
25	235.024	335.157		216.471	318.153
26	321.484	471.665		285.521	451.858
27	437.294	583.577		373.953	526.127
28	448.994	565.689		386.643	509.549
29	411.68	542.197		334.444	462.458
30	378.032	518.369		315.646	453.565
31	433.648	557.321		399.754	522.682
32	312.04	448.667		280.719	415.249
33	223.57	384.839		199.757	360.46
34	398.499	563.283		341.809	513.105
35	248.724	378.258		216.833	348.732
36	408.156	525.745		370.169	491.413
37	273.396	450.257		233.885	403.54
38	244.945	370.765		216.507	340.608
39	306.108	453.112		266.824	421.75
40	292.339	452.296		238.387	385.053
41	496.34	635.018		455.008	589.136
42	366.787	471.36		341.93	443.469
Mean	341.953	479.667		302.131	439.325
SD	81.5013	80.0366		73.27	72.6158
