# Supplementary material for: Temporal cascade of frontal, motor and muscle processes underlying human action-stopping
Source: eLife. 2020 Mar 18;9:e50371. doi: 10.7554/eLife.50371 (PMC7159878; doi:10.7554/eLife.50371)
Supplement: Figure 2—source data 1. [file elife-50371-fig2-data1.xlsx]

## Sheet: Sheet1
Figure 2 | Correlation between CancelTime and SSRTBeh for study 1 and 2
Figure 2d
Subject No	CancelTime	SSRTBeh
1	131.844	179.643
2	134.568	226.819
3	120.125	193.673
4	147.95	212.212
5	146.268	203.058
6	139.339	211.936
7	164.462	243.784
8	141.638	233.06
9	249.423	255.03
10	143.562	196.44
11	136.348	191.111
12	166.625	200.896
13	183.397	236.207
14	131.237	167.686
15	127.943	249.529
16	168.265	201.182
17	138.974	174.215
18	141.475	211.516
19	120.226	187.522
20	121.564	190.332
21	145.364	212.92
22	155.26	213.478
23	163.017	207.706
24	190.988	231.763
25	214.217	237.6
26	141.92	221.984
27	143.141	207.572
28	125.964	176.186
29	137.09	207.447
30	136.567	205.995
31	121.46	197.924
32	154.038	212.248
33	141.814	178.884
34	129.548	209.306
35	155.078	218.394
36	133.105	190.514
37	133.197	177.277
38	170.279	220.346
39	129	206.208
40	158.721	228.387
41	115.351	188.078
42	133.875	169.939
Mean	147.243	206.81
SD	25.8873	21.797
