# Supplementary material for: Temporal cascade of frontal, motor and muscle processes underlying human action-stopping
Source: eLife. 2020 Mar 18;9:e50371. doi: 10.7554/eLife.50371 (PMC7159878; doi:10.7554/eLife.50371)
Supplement: Figure 3—figure supplement 1—source data 1. [file elife-50371-fig3-figsupp1-data1.xlsx]

## Sheet: Sheet1
Figure 3-figure supplement 1 | Simulation results
c) squared error for Beh and EMG inhibition functions					f) squared error for Beh and EMG inhibition functions						k) Squared error for model with and without ballistic stage
Subject No	EMG	Beh			Subject No	EMG	Beh				Subject No	w/o Ballistic	w/ Ballistic
1	0.230872	0.101197			1	0.227015	0.134728				1	0.134728	0.123805
2	0.0778882	0.0309252			2	0.0376403	0.132108				2	0.132108	0.16016
3	0.192208	0.412886			3	0.202206	0.45219				3	0.45219	0.393899
4	0.375757	0.0214202			4	0.0441268	0.507208				4	0.507208	0.0319917
5	0.279136	0.0257491			5	0.0358772	0.258859				5	0.258859	0.0169679
6	0.0769204	0.121958			6	0.0440873	0.175306				6	0.175306	0.196199
7	0.27455	0.0799885			7	0.0288598	0.540719				7	0.540719	0.0662374
8	0.466128	0.101135			8	0.0731113	0.57496				8	0.57496	0.11681
9	0.0147458	0.0539215			9	0.0184814	0.0529797				9	0.0529797	0.0577101
10	0.385518	0.0656953			10	0.0484077	0.343086				10	0.343086	0.0706865
11	0.296044	0.125052			11	0.149601	0.312861				11	0.312861	0.234678
12	0.331099	0.179288			12	0.195307	0.194199				12	0.194199	0.210909
13	0.134738	0.0679566			13	0.135977	0.0765615				13	0.0765615	0.091789
14	0.0339639	0.0523767			14	0.0154071	0.172168				14	0.172168	0.112417
15	0.234455	0.181738			15	0.178483	0.149377				15	0.149377	0.171203
16	0.689461	0.34523			16	0.540337	0.507781				16	0.507781	0.578141
17	0.152071	0.108399			17	0.136412	0.188667				17	0.188667	0.105535
18	0.0782826	0.0153093			18	0.0286479	0.106408				18	0.106408	0.0677867
19	0.260933	0.215707			19	0.23639	0.273328				19	0.273328	0.2865
20	0.284777	0.340598			20	0.311041	0.346255				20	0.346255	0.36849
21	0.0249827	0.0256336			21	0.00988118	0.135891				21	0.135891	0.136441
22	0.0166549	0.0539926			22	0.0116469	0.0416086				22	0.0416086	0.0702809
23	0.0700168	0.0535653			23	0.00600188	0.168058				23	0.168058	0.227555
24	0.160279	0.0946151			24	0.132096	0.460807				24	0.460807	0.111461
25	0.116966	0.00607253			25	0.000822147	0.352564				25	0.352564	0.0103661
26	0.256754	0.0312659			26	0.530362	0.13943				26	0.13943	0.0228578
27	0.410846	0.147479			27	0.331093	0.157952				27	0.157952	0.157897
28	0.528914	0.0595598			28	0.717691	0.150469				28	0.150469	0.0704701
29	0.211242	0.129629			29	0.190396	0.163416				29	0.163416	0.164517
30	0.0771848	0.0379542			30	0.0716188	0.143528				30	0.143528	0.107674
31	0.222616	0.0980989			31	0.15711	0.257934				31	0.257934	0.1108
32	0.468894	0.0206498			32	0.0768751	0.289981				32	0.289981	0.0775744
33	0.0298597	0.152649			33	0.0578204	0.249945				33	0.249945	0.20141
34	0.0790756	0.226156			34	0.0534038	0.494124				34	0.494124	0.198567
35	0.131676	0.00672203			35	0.00620418	0.167662				35	0.167662	0.00567917
36	0.268436	0.0289439			36	0.268882	0.179001				36	0.179001	0.048453
37	0.0255602	0.0473711			37	0.049059	0.107212				37	0.107212	0.0536854
38	0.0211735	0.0132983			38	0.00157515	0.116699				38	0.116699	0.0274954
39	0.360839	0.00622822			39	0.273102	0.144833				39	0.144833	0.147543
40	0.292191	0.116221			40	0.23225	0.107033				40	0.107033	0.109025
41	0.300639	0.0837207			41	0.159072	0.170108				41	0.170108	0.16824
42	0.140694	0.0777726			42	0.139985	0.1528				42	0.1528	0.0959305
Mean	0.216311	0.0991459			Mean	0.146771	0.234543				Mean	0.234543	0.137758
SD	0.158193	0.094339			SD	0.158369	0.143777				SD	0.143777	0.112125
