# Supplementary material for: Temporal cascade of frontal, motor and muscle processes underlying human action-stopping
Source: eLife. 2020 Mar 18;9:e50371. doi: 10.7554/eLife.50371 (PMC7159878; doi:10.7554/eLife.50371)
Supplement: Figure 3—figure supplement 2—source data 1. [file elife-50371-fig3-figsupp2-data1.xlsx]

## Sheet: Sheet1
Figure 3-figure supplement 2 | Partial EMG voltage across SSDs for study 1 and 2
Subject No	SSD1	SSD2	SSD3	SSD4	SSD5
1	0.178222	0.118209	0.107438	0.186453	NaN
2	0.191934	0.20611	0.223733	0.32713	NaN
3	0.412973	0.330086	0.187489	NaN	NaN
4	0.333268	0.318051	NaN	NaN	NaN
5	0.381242	0.410884	NaN	NaN	NaN
6	0.279528	0.229263	0.286593	0.312459	0.424023
7	0.315746	0.251002	0.444118	NaN	NaN
8	0.187001	0.357703	0.383977	NaN	NaN
9	0.190722	0.237577	0.302792	0.214823	NaN
10	0.200494	0.0872113	NaN	NaN	NaN
11	0.346345	0.260344	0.505339	NaN	NaN
12	0.151112	0.100173	0.0787086	NaN	NaN
13	0.140755	0.126012	0.0887959	0.101435	NaN
14	0.204153	0.166314	0.329626	NaN	NaN
15	0.11885	0.123206	0.0391675	0.116199	0.151997
16	0.137664	0.294283	0.411956	NaN	NaN
17	0.176843	0.248644	NaN	NaN	NaN
18	0.228615	0.2071	0.292804	0.290298	NaN
19	0.229546	0.185799	0.192212	0.29315	NaN
20	0.200206	0.249807	0.216857	0.192622	0.350949
21	0.241679	0.219939	0.246936	NaN	NaN
22	0.136474	0.251213	0.350527	0.310511	NaN
23	0.281643	0.239923	0.209306	0.234263	NaN
24	0.259781	0.285221	NaN	NaN	NaN
25	0.257955	0.221286	NaN	NaN	NaN
26	0.131489	0.205154	0.163264	0.253061	NaN
27	0.0979506	0.180438	0.130013	0.167242	0.165338
28	0.144379	0.157149	0.195022	NaN	NaN
29	0.0647373	0.0943905	0.224466	0.162436	0.183469
30	0.174416	0.164083	0.138328	NaN	NaN
31	0.112794	0.144086	NaN	NaN	NaN
32	0.234325	0.239551	NaN	NaN	NaN
33	0.165627	0.195839	0.343208	0.471857	0.401488
34	0.23058	0.231639	0.20555	NaN	NaN
35	0.27042	0.28084	0.223301	NaN	NaN
36	0.190054	NaN	NaN	NaN	NaN
37	0.224665	0.200353	0.283096	0.326791	NaN
38	0.128155	0.24452	0.28972	NaN	NaN
39	0.191435	0.155749	0.199306	0.223133	NaN
40	0.266523	0.249475	0.276351	NaN	NaN
41	0.146397	0.0998417	0.141288	0.153546	0.143073
42	0.0909728	0.113145	0.10255	0.107889	NaN
Mean	0.205897	0.211747	0.236783	0.233963	0.260048
SD	0.0784865	0.07453	0.109465	0.0945061	0.126061
