# Supplementary material for: Temporal cascade of frontal, motor and muscle processes underlying human action-stopping
Source: eLife. 2020 Mar 18;9:e50371. doi: 10.7554/eLife.50371 (PMC7159878; doi:10.7554/eLife.50371)
Supplement: Figure 3—source data 1. [file elife-50371-fig3-data1.xlsx]

## Sheet: Sheet1
Figure 3 | Peripheral delay associated with SSRTBeh and relationship between CancelTime and BEESTS parameters
Figure 3b: Comparison of the SSRTBeh, CancelTime, and SSRTEMG							Figure 3d: Correlation between CancelTime and mean SSRTBEESTS						Figure 3e: Correlation between CancelTime and SD of the SSRTBEESTS						Figure 3f: Correlation between %Trigger Failures and CancelTime
Subject No	SSRTBeh	CancelTime	SSRTEMG				CancelTime	SSRTBEESTS					SD CancelTime	SD SSRTBEESTS					%Trigger Failures	CancelTime
1	179.643	131.844	134.444				131.844	188.315					33.017	40.2575					1.79016	131.844
2	226.819	134.568	208.643				134.568	218.369					34.7312	29.7975					4.05379	134.568
3	193.673	120.125	131.35				120.125	203.883					34.5655	38.3598					1.51226	120.125
4	212.212	147.95	148.5				147.95	211.387					20.262	30.9962					1.95673	147.95
5	203.058	146.268	101.357				146.268	192.798					13.4147	30.4242					9.24341	146.268
6	211.936	139.339	158.667				139.339	195.249					50.5318	40.8873					2.98564	139.339
7	243.784	164.462	143.75				164.462	240.85					35.7078	28.5414					5.08254	164.462
8	233.06	141.638	94.75				141.638	224.463					24.2507	36.903					4.92811	141.638
9	255.03	249.423	224.667				249.423	263.115					76.2954	133.983					6.81362	249.423
10	196.44	143.562	121.417				143.562	209.291					17.3376	26.049					1.92046	143.562
11	191.111	136.348	70.6428				136.348	195.01					12.851	30.6769					1.55504	136.348
12	200.896	166.625	232.05				166.625	220.419					40.3562	193.354					6.10997	166.625
13	236.207	183.397	199.5				183.397	211.168					69.5668	54.5359					2.35493	183.397
14	167.686	131.237	139.7				131.237	187.435					21.4976	30.027					2.04249	131.237
15	249.529	127.943	217.5				127.943	226.135					31.8239	44.425					2.16216	127.943
16	201.182	168.265	219.667				168.265	189.682					50.258	108.277					3.20852	168.265
17	174.215	138.974	101.375				138.974	204.597					23.647	30.2674					3.0709	138.974
18	211.516	141.475	149				141.475	162.862					25.3147	124.645					3.36995	141.475
19	187.522	120.226	182.7				120.226	183.185					23.7381	27.7627					1.26183	120.226
20	190.332	121.564	133.056				121.564	206.863					21.1395	14.4421					1.28187	121.564
21	212.92	145.364	155.417				145.364	221.762					15.3844	47.5911					10.8529	145.364
22	213.478	155.26	120.714				155.26	212.134					44.633	92.0954					7.29181	155.26
23	207.706	163.017	123.643				163.017	227.972					48.6171	58.1606					9.20349	163.017
24	231.763	190.988	116.917				190.988	244.727					43.9814	44.5745					18.5787	190.988
25	237.6	214.217	165.875				214.217	180.823					30.8049	27.0649					2.50064	214.217
26	221.984	141.92	217.667				141.92	211.771					30.9929	62.9579					14.9458	141.92
27	207.572	143.141	226.5				143.141	195.207					56.8062	26.5788					2.42475	143.141
28	176.186	125.964	192.25				125.964	171.737					27.8052	28.8766					3.65131	125.964
29	207.447	137.09	215.389				137.09	206.077					41.3439	24.0832					1.55451	137.09
30	205.995	136.567	210.286				136.567	192.742					34.7178	24.7066					1.35972	136.567
31	197.924	121.46	137.786				121.46	184.739					24.1186	21.2421					4.09962	121.46
32	212.248	154.038	117.429				154.038	209.977					24.4838	59.5067					6.3185	154.038
33	178.884	141.814	87.75				141.814	185.207					49.1092	42.1388					4.35561	141.814
34	209.306	129.548	158.429				129.548	201.814					21.9417	29.5184					1.81264	129.548
35	218.394	155.078	146.5				155.078	211.641					25.4655	41.672					3.47717	155.078
36	190.514	133.105	116.786				133.105	194.531					18.311	37.168					3.23341	133.105
37	177.277	133.197	127.143				133.197	192.898					36.9769	63.9896					3.62747	133.197
38	220.346	170.279	185.9				170.279	224.14					50.0609	51.8947					4.88432	170.279
39	206.208	129	162.571				129	205.912					23.2672	29.8617					2.38281	129
40	228.387	158.721	175.571				158.721	229.907					27.9811	43.2796					2.43252	158.721
41	188.078	115.351	204.062				115.351	185.794					29.4532	28.1196					1.66921	115.351
42	169.939	133.875	125.571				133.875	180.91					16.2251	26.04					1.37487	133.875
Mean	206.81	147.243	157.212				147.243	204.94					32.9235	47.7555					4.25562	147.243
SD	21.797	25.8873	43.6052				25.8873	20.3143					14.5465	34.9959					3.68557	25.8873
