# Supplementary material for: Temporal cascade of frontal, motor and muscle processes underlying human action-stopping
Source: eLife. 2020 Mar 18;9:e50371. doi: 10.7554/eLife.50371 (PMC7159878; doi:10.7554/eLife.50371)
Supplement: Figure 4—source data 1. [file elife-50371-fig4-data1.xlsx]

## Sheet: Fig4B
Figure 4 | Relationship between global motor system suppression and CancelTime
Figure 4B
	Normalised MEP amplitude on Go trials						Normalised MEP amplitude on Successful Stop trials						Normalised MEP amplitude on Failed Stop trials
	Time of TMS relative to stop signal						Time of TMS relative to stop signal						Time of TMS relative to stop signal							CancelTime
Subject No	ITI	100	120	140	160	180	ITI	100	120	140	160	180	ITI	100	120	140	160	180		(ms)
1	1	0.99691	1.03331	0.979585	1.0831	0.992011	1	0.979764	0.839173	0.805173	0.804162	0.760415	1	1.1188	0.959042	0.912065	1.3005	0.839758		211
2	1	0.973601	1.05993	1.03646	1.12358	1.12224	1	1.00472	0.942007	0.919787	1.0092	0.903678	1	1.00237	1.17204	1.0189	1.03638	1.0471		153
3	1	0.997389	1.11895	1.09697	1.11107	1.13619	1	1.15616	1.0972	1.01911	0.87427	1.0225	1	0.974142	0.968844	1.05478	1.16323	1.28457		213
4	1	0.925772	0.963495	0.947489	0.972446	1.05197	1	0.74331	0.802794	1.01533	0.916039	0.864021	1	1.04579	1.06442	0.858541	0.985799	0.912647		148
5	1	1.0962	0.94514	1.15429	1.00774	0.898439	1	1.01692	1.12245	0.960337	1.16009	0.783594	1	0.954774	1.14977	0.823385	1.2123	0.970418		173
6	1	0.979193	1.15327	0.994969	1.09014	1.00488	1	0.948565	0.919075	0.995145	0.953532	0.951455	1	1.03797	1.05229	1.05498	1.0685	1.02008		169
7	1	1.01621	0.913481	0.961634	0.908706	0.920902	1	1.01503	1.01802	0.801927	0.977367	1.01046	1	0.985022	0.823214	0.837943	0.939216	0.730468		133
8	1	1.02591	0.995819	1.03265	1.01001	1.01011	1	0.935689	0.874437	0.879558	0.827592	0.84916	1	0.949746	0.958847	0.884898	1.06337	0.802878		159
9	1	0.769976	0.96684	0.740238	0.934077	0.766492	1	0.831872	0.897465	0.675809	1.02889	0.749841	1	0.791586	0.919653	0.840887	0.91476	0.6132		135
10	1	0.796558	0.740999	0.782359	0.679748	0.79454	1	0.786995	0.73977	0.787339	0.671189	0.64015	1	0.773494	0.799414	0.810166	1.05337	0.925428		169
11	1	0.876797	1.01295	0.835963	1.0929	0.861999	1	0.903984	1.13245	0.82625	1.04206	0.790701	1	0.830848	1.22227	0.746839	1.09566	0.868438		158
12	1	0.755974	0.74286	0.69675	0.779338	0.748296	1	0.882602	0.615098	0.624253	0.556912	0.564389	1	0.709705	0.818414	0.736513	0.742164	0.649033		249
13	1	0.969721	1.04095	0.996264	0.966642	0.958465	1	1.06263	0.914305	0.86781	0.915533	0.925249	1	1.03629	0.848518	0.900646	0.834577	0.693723		129
14	1	0.70892	0.594285	0.619298	0.62041	0.647926	1	0.754269	0.585716	0.659488	0.668691	0.713427	1	0.705344	0.534303	0.525013	0.596315	0.480786		135
15	1	0.986823	0.984609	0.988033	1.03472	1.07351	1	1.08787	0.702323	0.886466	1.03998	0.897309	1	1.05423	0.831514	0.704506	1.11882	0.991535		136
16	1	0.709197	0.709449	0.794671	0.724176	0.741867	1	0.75352	0.544272	0.736013	0.755003	0.730626	1	0.776175	0.683593	0.606628	0.883489	0.789285		125
17	1	0.909078	0.967056	0.99824	1.01152	1.0045	1	0.880349	0.881301	0.907082	0.87886	0.82011	1	0.987804	0.942111	1.04537	1.02988	1.03525		123
Mean	1	0.911425	0.937846	0.920933	0.95002	0.925549	1	0.926133	0.860462	0.84511	0.887022	0.822181	1	0.925535	0.926368	0.844827	1.00225	0.862035		159.882
SD	0	0.120195	0.153095	0.148947	0.157376	0.144827	0	0.124745	0.179841	0.122173	0.158622	0.124751	0	0.131769	0.17732	0.152061	0.173297	0.195332		35.3286
SEM	0	0.0291515	0.0371309	0.0361251	0.0381692	0.0351258	0	0.0302551	0.0436178	0.0296313	0.0384715	0.0302567	0	0.0319586	0.0430065	0.0368801	0.0420307	0.047375		8.56845

## Sheet: Fig4C
Figure 4B
Subject No	MEP onset latency (ms)
1	22.46
2	22.287
3	23.71
4	23.013
5	24.248
6	21.584
7	25.2
8	25.5
9	22.458
10	22.649
11	24.413
12	24.204
13	22.681
14	20.5
15	24.819
16	23.313
17	23.555
Mean	23.3291
SD	1.32395
SEM	0.321106

## Sheet: Fig4D
Fig 4D	Summary data plotted in figures																Individual trial data
																			Go trials			Failed Stop trials			Failed Stop trials
	Go trials					Successful Stop trials					Failed Stop trials								TMS time relative to CancelTime		Normalised MEP amplitude	TMS time relative to CancelTime		Normalised MEP amplitude	TMS time relative to CancelTime		Normalised MEP amplitude
	Bin (ms)		Mean time (ms)	MEP amplitude	MEP SEM	Bin (ms)		Mean time (ms)	MEP amplitude	MEP SEM	Bin (ms)		Mean time (ms)	MEP amplitude	MEP SEM			Trial number	seconds	Time category (ms)		seconds	Time category (ms)		seconds	Time category (ms)
	-90	-60	-78.2927	0.937622	0.020431	-90	-60	-76.8017	0.946777	0.052997	-90	-60	-76.9122	0.905771	0.057975			1	-0.0325	-60	0.948947	-0.021	-30	0.985055	-0.0895	-90	0.815456
	-60	-30	-40.3802	0.885536	0.018752	-60	-30	-40.5209	0.900133	0.028232	-60	-30	-39.219	0.923308	0.039011			2	-0.035	-60	1.06036	-0.0575	-60	1.67035	-0.069	-90	0.910174
	-30	0	-15.9423	0.950511	0.011569	-30	0	-16.7646	0.869771	0.020884	-30	0	-14.3525	0.982555	0.019463			3	-0.0835	-90	1.31482	-0.015	-30	0.443233	-0.086	-90	1.27986
	0	30	14.5198	0.968939	0.014208	0	30	13.3714	0.835523	0.023289	0	30	15.2331	0.883984	0.022104			4	-0.0335	-60	0.672289	-0.051	-60	0.964914	0.029	0	1.13621
	30	60	43.9659	0.965456	0.018866	30	60	43.4467	0.846598	0.027533	30	60	44.3216	0.906053	0.025123			5	-0.0265	-30	1.21091	0.012	0	0.763257	-0.087	-90	0.85701
																		6	0.00950004	0	1.27006	-0.016	-30	0.95947	-0.033	-60	1.46319
																		7	0.0125	0	1.20419	-0.083	-90	1.29601	-0.00199996	-30	0.8607
																		8	0.0155	0	0.889732	-0.013	-30	0.266253	0.0115	0	0.596017
																		9	-0.0115	-30	0.941687	-0.068	-90	1.03532	0.0365	30	0.592025
																		10	-0.087	-90	1.17849	0.0375	30	1.54986	0.0325	30	0.37283
																		11	-0.018	-30	0.260145	-0.00399996	-30	1.35099	-0.00499996	-30	1.05552
																		12	-0.018	-30	0.749346	0.00400004	0	1.1134	0.00250004	0	0.306959
																		13	0.00050004	0	0.950216	0.013	0	0.9856	0.028	0	1.11806
																		14	-0.0115	-30	0.60884	-0.026	-30	0.490531	-0.013	-30	1.55664
																		15	-0.015	-30	0.741424	-0.0675	-90	1.41546	-0.00849996	-30	1.17957
																		16	0.0385	30	0.455028	0.023	0	0.944288	-0.018	-30	0.786363
																		17	-0.0325	-60	0.626077	0.00850004	0	0.570856	-0.033	-60	1.45986
																		18	-0.00999996	-30	0.768156	0.018	0	1.35946	0.0115	0	0.972232
																		19	-0.019	-30	0.610293	-0.0715	-90	0.852533	-0.018	-30	0.63878
																		20	-0.015	-30	0.905275	0.057	30	0.607025	-0.00299996	-30	1.64996
																		21	-0.0375	-60	0.516298	-0.026	-30	0.934067	0.0525	30	1.1327
																		22	-0.00949996	-30	0.520169	0.0395	30	0.422728	0.043	30	0.595533
																		23	-0.083	-90	1.35395	0.0155	0	0.989471	-0.017	-30	0.938483
																		24	-0.018	-30	1.04742	-0.0165	-30	0.710999	-0.0855	-90	0.997698
																		25	0.0225	0	0.854045	0.038	30	0.369803	-0.015	-30	1.13778
																		26	0.0135	0	1.18375	-0.0105	-30	0.806262	-0.087	-90	1.10657
																		27	-0.0865	-90	0.98929	-0.057	-60	0.904189	0.0235	0	0.933704
																		28	0.031	30	1.07742	0.0185	0	0.759569	-0.09	-90	1.28567
																		29	-0.075	-90	0.85477	0.024	0	0.731926	0.00350004	0	1.04209
																		30	-0.029	-30	0.629284	-0.0425	-60	0.710335	-0.00849996	-30	1.03816
																		31	-0.0355	-60	0.244297	-0.081	-90	0.627651	0.015	0	0.935759
																		32	-0.028	-30	0.398112	0.0325	30	0.941325	0.00150004	0	0.849508
																		33	-0.0125	-30	0.989714	0.015	0	0.709306	-0.0365	-60	0.518233
																		34	-0.084	-90	0.919065	-0.0835	-90	0.652328	-0.0155	-30	1.223
																		35	-0.09	-90	0.987354	-0.029	-30	0.566925	-0.00599996	-30	1.85247
																		36	-0.0585	-60	0.556159	-0.066	-90	0.826587	-0.0205	-30	1.12278
																		37	0.00050004	0	1.35934	-0.0675	-90	0.670293	-0.00349996	-30	0.909328
																		38	-0.0335	-60	1.58422	-0.0825	-90	0.668719	0.054	30	0.851383
																		39	0.00400004	0	0.691462	-0.088	-90	0.750858	-0.0125	-30	0.946589
																		40	-0.016	-30	0.770033	-0.021	-30	0.818419	0.00100005	0	0.440934
																		41	-0.018	-30	0.869833	-0.00749996	-30	0.433555	0.0325001	30	1.60684
																		42	0.0445	30	0.76338	-0.0125	-30	0.619485	-0.0355	-60	1.287
																		43	0.0445	30	0.716865	-0.00899996	-30	0.50771	-0.00199996	-30	1.29226
																		44	-0.0225	-30	0.430168	0.014	0	1.35038	-0.011	-30	1.48036
																		45	-0.019	-30	1.41111	0.0125001	0	0.987942	-0.0325	-60	1.96733
																		46	-0.0445	-60	0.407787	0.0135	0	1.43665	0.028	0	0.902674
																		47	0.034	30	0.558758	-0.0125	-30	1.12827	0.00700004	0	1.40549
																		48	0.00500004	0	0.756724	0.0480001	30	1.01765	-0.0705	-90	0.602853
																		49	-0.084	-90	0.955478	0.00750004	0	0.814312	-0.034	-60	1.43361
																		50	-0.0375	-60	0.797612	0.017	0	0.630816	-0.032	-60	0.667572
																		51	-0.0195	-30	0.416318	-0.0265	-30	0.578855	-0.062	-90	1.04197
																		52	-0.00599996	-30	1.28397	-0.03	-30	1.15793	-0.016	-30	0.624626
																		53	-0.054	-60	0.622327	-0.046	-60	1.17712	-0.09	-90	2.38256
																		54	-0.0325	-60	0.933098	0.00550004	0	0.578909	0.0305	30	2.28457
																		55	-0.0325	-60	0.221374	-0.0355	-60	0.553062	-0.011	-30	1.55555
																		56	-0.085	-90	1.31319	0.0445	30	0.543358	0.045	30	0.854348
																		57	0.0155	0	0.704708	0.00300004	0	0.370747	-0.0705	-90	1.58325
																		58	-0.0375	-60	0.804991	0.0215	0	0.558318	0.046	30	2.22711
																		59	-0.00199996	-30	1.54139	-0.0795	-90	0.784928	-0.00549996	-30	1.39865
																		60	-0.0385	-60	0.63128	-0.0315	-60	1.26587	0.057	30	0.790053
																		61	-0.0135	-30	1.39206	-0.0255	-30	1.11433	-0.00199995	-30	0.978219
																		62	-0.086	-90	1.91229	-0.085	-90	0.749482	0.0145	0	1.15556
																		63	-0.00799996	-30	1.98892	0.052	30	0.604057	-0.019	-30	0.723338
																		64	0.0455	30	1.15744	-0.00249996	-30	0.982902	0.056	30	0.508917
																		65	-0.0315	-60	0.962496	-0.0515	-60	0.620521	-0.0255	-30	1.08631
																		66	-0.00699996	-30	1.81515	-0.027	-30	0.798869	0.039	30	1.59305
																		67	-0.056	-60	1.69152	0.0495	30	0.811309	-0.0145	-30	1.80535
																		68	-0.0865	-90	1.11498	-0.0285	-30	0.674786	0.013	0	0.936425
																		69	-0.077	-90	0.9308	-0.053	-60	0.601968	0.049	30	1.11274
																		70	-0.0385	-60	1.56214	-0.018	-30	1.27359	0.0555	30	1.09151
																		71	0.0355	30	0.945378	-0.0285	-30	1.32437	-0.025	-30	0.889005
																		72	0.016	0	1.45018	-0.019	-30	1.2168	0.00900004	0	1.43464
																		73	-0.00599996	-30	0.962433	0.0125	0	0.578533	0.0285	0	1.67519
																		74	-0.00749996	-30	1.67857	-0.015	-30	0.9777	0.00500004	0	0.85326
																		75	-0.024	-30	1.12659	-0.03	-30	1.20973	-0.0815	-90	1.013
																		76	0.00650004	0	0.947374	-0.09	-90	0.903432	0.0425	30	1.60182
																		77	-0.0895	-90	1.37186	0.0385	30	0.94944	-0.0124999	-30	0.489504
																		78	-0.00749996	-30	2.20939	-0.0265	-30	0.986385	-0.0635	-90	0.56535
																		79	-0.085	-90	0.982092	-0.00999996	-30	0.906597	-0.016	-30	0.858883
																		80	-0.0205	-30	0.949005	0.01	0	0.827128	0.0355	30	1.52512
																		81	-0.0175	-30	1.49815	-0.031	-60	1.36255	-0.0225	-30	0.599162
																		82	-0.0875	-90	0.697753	-0.00449996	-30	1.22334	-0.038	-60	0.820173
																		83	-0.0675	-90	1.59474	-0.052	-60	1.03835	-0.035	-60	0.407242
																		84	-0.0855	-90	1.05111	-0.0105	-30	0.683849	-0.0275	-30	0.298674
																		85	-0.013	-30	0.33563	-0.0345	-60	1.35622	0.0385001	30	0.421035
																		86	-0.079	-90	0.88356	-0.028	-30	1.33059	0.00900004	0	0.804084
																		87	-0.021	-30	0.887675	-0.0295	-30	1.0132	0.00400004	0	0.673377
																		88	0.058	30	0.5091	-0.00049996	-30	1.0451	0.013	0	0.888943
																		89	0.00400004	0	0.863118	0.0435	30	0.906542	-0.00099996	-30	0.629706
																		90	-0.0105	-30	1.80009	-0.013	-30	0.933247	-0.035	-60	0.419039
																		91	0.00300004	0	1.50353	0.018	0	0.873994	-0.018	-30	0.426781
																		92	-0.00599996	-30	0.557911	-0.0325	-60	0.52802	0.00550004	0	1.03538
																		93	0.042	30	0.959832	-0.074	-90	0.79624	0.0535	30	0.900074
																		94	-0.0295	-30	1.71474	0.0405	30	0.893673	0.028	0	0.393575
																		95	0.00550004	0	1.33411	0.0115	0	1.09873	0.0565001	30	1.65045
																		96	0.0545001	30	1.0825	0.015	0	1.034	0.0445	30	1.53318
																		97	-0.023	-30	0.691524	0.00750004	0	1.0177	-0.0575	-60	1.57548
																		98	-0.00899996	-30	1.90225	-0.0865	-90	0.568131	0.0495	30	1.46749
																		99	0.0145	0	1.34373	-0.0795	-90	1.09798	0.00900004	0	1.199
																		100	-0.0845	-90	1.94471	-0.032	-60	1.31751	0.0365	30	1.43236
																		101	-0.0149999	-30	1.737	0.00250004	0	1.36625	-0.023	-30	1.07888
																		102	-0.00149996	-30	1.21804	0.0405	30	1.28753	0.022	0	1.2656
																		103	-0.024	-30	1.27187	-0.0205	-30	1.15262	0.019	0	1.19728
																		104	0.012	0	0.823925	-0.00349996	-30	1.04521	-0.00799996	-30	1.13299
																		105	0.0130001	0	0.67634	-0.017	-30	1.06258	0.0395001	30	1.07331
																		106	0.0350001	30	0.850959	-0.0245	-30	1.34991	0.0185001	0	0.927991
																		107	-0.0105	-30	1.14498	-0.017	-30	0.685028	0.00450005	0	0.799512
																		108	0.00250004	0	1.37542	-0.0295	-30	0.744306	-0.017	-30	0.55837
																		109	-0.00949995	-30	0.657289	-0.018	-30	0.599705	0.0395001	30	0.506142
																		110	-0.0839999	-90	0.595595	-0.0355	-60	1.08718	-0.024	-30	0.896031
																		111	-0.0165	-30	1.13663	-0.0125	-30	0.713085	0.021	0	0.511129
																		112	-0.00599995	-30	0.471964	-0.0149999	-30	0.602151	-0.00499995	-30	0.565235
																		113	-0.00599996	-30	1.0078	0.026	0	0.948333	0.0425	30	0.835922
																		114	0.023	0	0.802756	0.0565	30	0.890639	0.0255	0	0.84391
																		115	-0.089	-90	1.08957	0.0115	0	0.68028	-0.0205	-30	0.858122
																		116	-0.0155	-30	1.50317	-0.022	-30	0.846612	0.032	30	1.0858
																		117	-0.0205	-30	1.32232	0.037	30	0.943157	0.0290001	0	1.04639
																		118	-0.019	-30	1.26709	-0.021	-30	0.916971	0.00400004	0	1.12945
																		119	-0.00699995	-30	1.33218	-0.039	-60	0.723015	-0.0285	-30	1.18608
																		120	-0.09	-90	1.1477	0.0155	0	0.61035	0.0285	0	0.93432
																		121	-0.0145	-30	1.34458	-0.046	-60	0.535966	-0.0265	-30	0.468071
																		122	0.035	30	0.529666	-0.029	-30	0.899413	0.0175	0	0.986548
																		123	0.055	30	1.21417	-0.027	-30	0.772076	0.00300004	0	1.01256
																		124	-0.0195	-30	0.875942	-0.032	-60	0.84805	-0.022	-30	0.76809
																		125	0.0295	0	1.73591	-0.016	-30	0.685749	0.0585	30	0.967781
																		126	-0.088	-90	1.28343	-0.088	-90	0.707475	0.019	0	0.697468
																		127	0.028	0	0.770757	-0.031	-60	1.25682	-0.025	-30	0.982203
																		128	-0.0255	-30	1.4298	-0.031	-60	0.757258	0.0175	0	0.803211
																		129	-0.0795	-90	0.187141	-0.0145	-30	0.95409	0.0125	0	0.627918
																		130	0.0265	0	1.22294	-0.055	-60	1.15682	-0.036	-60	1.12586
																		131	-0.0315	-60	1.06629	-0.026	-30	1.15006	-0.025	-30	1.22136
																		132	-0.0125	-30	1.2308	-0.00399996	-30	0.668196	0.018	0	0.894049
																		133	-0.0695	-90	0.971447	0.00650004	0	0.804599	-0.00799996	-30	0.551776
																		134	0.00700004	0	1.98287	-0.03	-30	1.25034	0.0235	0	0.83737
																		135	-0.082	-90	2.10959	-0.031	-60	1.5207	0.0295	0	0.660202
																		136	-0.00449996	-30	2.42151	-0.026	-30	1.12315	-0.00549996	-30	0.921128
																		137	0.024	0	1.13693	-0.0335	-60	0.982435	-0.017	-30	0.933568
																		138	-0.0885	-90	1.69152	-0.0255	-30	1.15913	-0.0675	-90	1.06602
																		139	-0.00649996	-30	1.73089	-0.02	-30	1.17711	-0.0204999	-30	0.845681
																		140	-0.075	-90	1.72684	-0.024	-30	1.56142	-0.0865	-90	1.06371
																		141	-0.025	-30	1.39079	0.0130001	0	0.639129	0.0205	0	1.03802
																		142	-0.0745	-90	1.26933	-0.0375	-60	0.870926	0.0205	0	0.796402
																		143	0.00450004	0	1.86069	-0.0369999	-60	0.696683	0.0255	0	1.41311
																		144	0.032	30	1.64283	0.0525	30	1.10459	-0.049	-60	0.903111
																		145	0.0215	0	2.61276	-0.0265	-30	1.33998	-0.0129999	-30	1.4418
																		146	0.022	0	1.98209	-0.0515	-60	0.853227	-0.00599995	-30	0.917268
																		147	-0.031	-60	1.22984	0.0380001	30	0.85855	0.025	0	1.20989
																		148	0.00550004	0	1.61488	0.0290001	0	1.33883	-0.0215	-30	0.860965
																		149	-0.0245	-30	0.739063	-0.0365	-60	1.30502	-0.00049995	-30	1.23718
																		150	-0.0815	-90	1.14026	-0.0225	-30	1.11021	-0.0635	-90	1.09261
																		151	-0.00299996	-30	1.50504	-0.018	-30	1.68804	0.0125	0	1.04419
																		152	-0.09	-90	1.58664	-0.0375	-60	0.752652	-0.00399996	-30	0.985101
																		153	0.037	30	1.31306	-0.0325	-60	1.82991	-0.0165	-30	1.39161
																		154	-0.023	-30	0.81727	-0.039	-60	0.894811	0.0285	0	1.45875
																		155	-0.0265	-30	1.01379	0.0415	30	1.08934	0.0130001	0	1.71308
																		156	-0.0645	-90	0.898381	-0.0129999	-30	0.682727	0.0535	30	1.12967
																		157	0.0195	0	0.731625	-0.0375	-60	1.19639	5e-08	0	1.42212
																		158	-0.075	-90	0.93322	-0.041	-60	0.930493	-0.03	-30	1.67989
																		159	-0.00649996	-30	1.00477	-0.0245	-30	1.45639	-0.076	-90	1.32067
																		160	0.053	30	0.652632	-0.0345	-60	1.01107	-0.0285	-30	1.37912
																		161	-0.00199996	-30	0.687288	-0.02	-30	1.26329	-0.0135	-30	1.46164
																		162	-0.015	-30	1.21635	-0.087	-90	0.559129	-0.024	-30	1.6979
																		163	-0.0245	-30	0.966305	-0.041	-60	1.3138	-0.0255	-30	1.37847
																		164	-0.047	-60	0.676221	-0.0249999	-30	0.950985	0.00650004	0	1.0695
																		165	0.022	0	0.976104	0.0560001	30	1.55954	-0.00499996	-30	1.01459
																		166	-0.0205	-30	1.09423	-0.0244999	-30	1.02669	0.033	30	0.875282
																		167	-0.00349996	-30	0.809286	0.012	0	0.669887	-0.0445	-60	0.956679
																		168	-0.023	-30	1.10512	0.0235001	0	1.00315	-0.00399996	-30	1.20356
																		169	-0.0825	-90	0.86971	0.00350005	0	1.1195	-0.00049996	-30	0.789967
																		170	0.034	30	0.843402	0.0175	0	0.591642	0.012	0	0.699828
																		171	-0.0305	-60	0.784307	0.00750005	0	1.25419	0.0115	0	0.698058
																		172	0.025	0	0.630313	0.0240001	0	0.954447	0.033	30	1.15921
																		173	-0.0895	-90	0.662006	-0.02	-30	0.826585	-0.0685	-90	0.767123
																		174	0.0405	30	1.02449	-0.00949995	-30	0.381351	-0.026	-30	1.4018
																		175	0.017	0	1.68759	-0.0379999	-60	1.28272	0.0185	0	1.01052
																		176	-0.0375	-60	1.79761	-0.00249995	-30	0.636061	-0.00749996	-30	1.15299
																		177	-0.0135	-30	1.6594	-0.00999996	-30	0.144776	-0.025	-30	1.05883
																		178	-0.072	-90	1.34942	-0.00049995	-30	0.660516	0.0545001	30	0.690979
																		179	-0.0255	-30	1.5991	0.0110001	0	1.20702	-0.015	-30	0.816456
																		180	-0.0885	-90	1.06399	-0.0249999	-30	1.10829	-0.00649996	-30	1.10355
																		181	0.00250004	0	1.28397	0.026	0	1.15985	0.0400001	30	0.818923
																		182	0.022	0	1.75817	-0.017	-30	0.667543	0.00300004	0	0.923113
																		183	-0.017	-30	1.0009	-0.0295	-30	0.632292	-0.00149995	-30	1.49827
																		184	-0.024	-30	0.419342	-0.0244999	-30	0.442075	-0.00849996	-30	1.11648
																		185	-0.029	-30	0.949734	-0.0404999	-60	0.627401	-0.023	-30	1.57323
																		186	-0.0875	-90	0.761624	-0.00499996	-30	0.908909	0.012	0	1.30244
																		187	-0.00749996	-30	0.784488	-0.0249999	-30	0.817821	0.025	0	0.977807
																		188	0.0435	30	1.12187	-0.051	-60	0.503715	0.051	30	1.37676
																		189	-0.0155	-30	0.746323	0.0385001	30	0.827806	0.016	0	0.938824
																		190	-0.0305	-60	0.479582	-0.065	-90	1.18562	-0.035	-60	1.57984
																		191	0.00500004	0	0.620815	0.00300004	0	1.04533	-0.0345	-60	1.01898
																		192	0.033	30	1.75128	-0.0775	-90	1.14385	-0.0235	-30	1.23984
																		193	-0.088	-90	0.620877	-0.021	-30	0.216607	-0.023	-30	1.22071
																		194	-0.035	-60	1.22101	-0.068	-90	0.50942	0.0345	30	1.04042
																		195	-0.0175	-30	0.931768	-0.0199999	-30	0.809672	-0.022	-30	1.35941
																		196	0.029	0	1.2403	-0.00049995	-30	1.50656	-0.017	-30	0.7092
																		197	0.0485	30	0.731684	-0.00949995	-30	0.869171	-0.054	-60	0.635961
																		198	0.014	0	0.572126	0.00500004	0	0.700248	-0.027	-30	0.59035
																		199	-0.00949996	-30	1.04978	-0.00499995	-30	0.873655	0.0335	30	1.14977
																		200	-0.0375	-60	0.852957	-0.012	-30	0.96036	-0.022	-30	1.15265
																		201	-0.087	-90	0.752915	-0.073	-90	0.932443	-0.032	-60	0.639129
																		202	-0.0785	-90	1.03526	-0.00449996	-30	0.912368	-0.0305	-60	1.44675
																		203	-0.00749996	-30	0.367686	-0.018	-30	0.859085	-0.034	-60	1.68732
																		204	0.044	30	1.72847	-0.0724999	-90	1.49759	-0.012	-30	0.501288
																		205	0.015	0	0.935278	0.053	30	1.3465	-0.032	-60	0.726612
																		206	0.00250004	0	0.654142	-0.027	-30	1.14589	-0.018	-30	0.973515
																		207	0.0295	0	1.03792	0.00700004	0	0.682316	-0.0265	-30	0.601718
																		208	0.0235	0	0.827613	-0.00749996	-30	1.53671	-0.0215	-30	0.537116
																		209	0.0405	30	0.521743	-0.0215	-30	1.18185	0.0290001	0	0.852364
																		210	0.057	30	1.25935	-0.022	-30	1.25643	-0.014	-30	0.780568
																		211	-0.00849996	-30	0.817513	-0.00299995	-30	0.895969	0.01	0	0.923444
																		212	-0.0345	-60	0.582167	-0.00299996	-30	0.569938	-0.037	-60	0.966754
																		213	-0.019	-30	0.802694	-0.024	-30	0.854298	-0.025	-30	1.15352
																		214	0.016	0	0.459624	-0.0255	-30	0.189502	-0.0145	-30	1.52243
																		215	-0.0105	-30	0.819085	0.0205	0	1.36963	0.0385	30	1.62128
																		216	0.0515	30	1.06417	-0.0634999	-90	0.923986	-0.0219999	-30	1.60344
																		217	-0.0315	-60	0.752309	-0.0355	-60	0.547016	0.00050005	0	0.900134
																		218	0.00800004	0	0.707249	-0.0465	-60	0.494951	-0.0405	-60	1.29552
																		219	0.018	0	0.487266	-0.0445	-60	0.838506	-0.017	-30	1.72171
																		220	-0.025	-30	0.750012	0.00850005	0	0.887716	0.0575	30	1.33495
																		221	0.01	0	1.3603	0.0215	0	1.21344	-0.0115	-30	1.4597
																		222	0.0405	30	0.835961	0.012	0	1.4548	-0.0159999	-30	1.24301
																		223	-0.011	-30	0.61634	0.0305001	30	1.21293	0.00950004	0	1.59308
																		224	-0.089	-90	0.567407	-0.0305	-60	1.47029	0.0535001	30	1.2479
																		225	-0.00149996	-30	1.3332	-0.0565	-60	0.580227	0.015	0	1.70502
																		226	-0.00649996	-30	1.24417	0.0455001	30	0.569327	-0.0385	-60	1.77868
																		227	0.024	0	1.39248	0.0525	30	0.65053	-0.00299996	-30	2.12559
																		228	-0.0105	-30	0.604908	-0.0275	-30	0.550988	0.00750005	0	1.1633
																		229	-0.036	-60	0.805901	-0.00949995	-30	0.894848	0.0555001	30	1.24301
																		230	-0.018	-30	0.942112	-0.0209999	-30	1.0004	-0.03	-30	0.624457
																		231	-0.0135	-30	0.839226	0.052	30	0.659087	-0.0385	-60	0.87294
																		232	0.00650004	0	0.521681	0.00650005	0	0.658576	-0.0205	-30	1.26761
																		233	-0.023	-30	0.470269	-0.042	-60	0.46612	-0.0345	-60	1.43279
																		234	-0.00149996	-30	0.395388	-0.0565	-60	0.310541	-0.032	-60	0.784165
																		235	-0.037	-60	0.489805	0.0185001	0	0.32491	0.00800004	0	1.18977
																		236	0.00950004	0	1.22833	-0.0295	-30	0.403055	-0.00099996	-30	1.16531
																		237	0.00250004	0	0.806626	-0.0139999	-30	0.984477	-0.033	-60	0.823015
																		238	-0.0185	-30	0.578417	-0.0249999	-30	1.21795	-0.033	-60	1.23754
																		239	0.054	30	1.0603	0.0325	30	0.605459	-0.0419999	-60	0.882001
																		240	-0.0275	-30	0.563477	-0.0245	-30	1.01596	-0.00649996	-30	1.76645
																		241	-0.00199996	-30	0.927172	-0.0345	-60	1.26666	-0.0334999	-60	1.77768
																		242	0.00250004	0	0.770335	-0.064	-90	1.06428	-0.00299995	-30	1.63192
																		243	-0.0195	-30	1.11189	0.0560001	30	1.01567	0.0125001	0	1.24142
																		244	-0.0165	-30	0.611623	-0.00799996	-30	0.569024	-0.0475	-60	1.11006
																		245	0.00950004	0	1.18393	0.00050004	0	0.950913	-0.0235	-30	0.856824
																		246	0.00100004	0	1.04881	0.0225	0	0.520903	-0.00149996	-30	1.03424
																		247	-0.0335	-60	0.877392	-0.0355	-60	0.58427	-0.00799996	-30	1.28963
																		248	-0.027	-30	0.946587	-0.059	-60	1.90212	-0.019	-30	1.87293
																		249	-0.0805	-90	1.20716	-0.0185	-30	0.923686	0.0475	30	0.411505
																		250	-0.0115	-30	1.06937	0.00300005	0	1.29558	-0.00449996	-30	1.37308
																		251	0.026	0	1.07971	-0.034	-60	1.43974	-0.0194999	-30	1.0161
																		252	0.00100005	0	0.437243	0.0470001	30	1.07062	0.0485001	30	1.19398
																		253	0.051	30	1.22663	-0.058	-60	1.0522	-0.00549995	-30	1.19398
																		254	-0.0445	-60	1.34246	-0.028	-30	0.459217	-0.0189999	-30	1.64054
																		255	0.0465	30	1.12103	-0.0515	-60	1.0421	0.0415	30	1.51227
																		256	0.0205	0	0.694487	0.0320001	30	0.656452	0.0530001	30	1.38705
																		257	-0.0805	-90	0.38813	-0.054	-60	1.24359	-0.0169999	-30	1.19347
																		258	-0.079	-90	0.734467	-0.086	-90	1.764	0.0345	30	1.16249
																		259	-0.0205	-30	0.412265	-0.08	-90	0.520903	0.0585	30	0.339986
																		260	0.035	30	1.35547	0.034	30	0.408526	-0.0579999	-60	0.97778
																		261	-0.014	-30	1.3085	-0.0355	-60	0.876058	0.0260001	0	0.976355
																		262	0.016	0	1.50433	-0.0345	-60	0.8919	0.0490001	30	1.10401
																		263	-0.00699995	-30	1.34743	-0.0435	-60	0.270206	-0.0665	-90	1.52643
																		264	0.0385	30	1.1043	-0.064	-90	0.238719	0.00750005	0	1.05389
																		265	0.0390001	30	1.56251	-0.0865	-90	1.38696	0.024	0	1.1571
																		266	0.0465001	30	1.57275	-0.016	-30	0.994181	-0.00599996	-30	0.961582
																		267	0.00350005	0	1.83475	-0.0185	-30	1.18141	-0.019	-30	1.18929
																		268	-0.026	-30	1.34968	-0.0375	-60	0.982397	-0.067	-90	0.83229
																		269	-0.0144999	-30	1.15004	-0.075	-90	1.65618	-0.0729999	-90	1.0543
																		270	5e-08	0	1.33043	-0.0715	-90	1.33557	-0.00799995	-30	1.3465
																		271	0.0410001	30	1.33504	-0.05	-60	1.2133	0.0480001	30	1.25154
																		272	0.0575	30	1.69356	-0.0614999	-90	1.55954	-0.0439999	-60	0.611202
																		273	-0.0115	-30	1.40453	0.0360001	30	0.611004	0.0285	0	1.16117
																		274	-0.0185	-30	1.663	0.0370001	30	1.17349	0.0185	0	0.769733
																		275	-0.032	-60	1.19069	0.00050005	0	2.26619	0.051	30	0.808857
																		276	0.0435	30	1.6794	0.0385001	30	0.92555	-0.0149999	-30	1.20906
																		277	0.00700004	0	1.53387	-0.00399995	-30	0.985458	-0.00199995	-30	1.2495
																		278	-0.028	-30	1.50331	0.0475001	30	1.10988	-0.083	-90	1.0005
																		279	0.0415	30	1.14908	5e-08	0	1.05972	0.044	30	0.796731
																		280	-0.024	-30	1.26045	-0.00649995	-30	0.771036	-0.0144999	-30	0.781451
																		281	-0.0335	-60	0.799888	-0.00399995	-30	0.789289	-0.079	-90	0.814155
																		282	-0.0135	-30	1.2264	0.0130001	0	0.83666	-0.0125	-30	1.05002
																		283	0.00450005	0	1.27879	0.0450001	30	0.830108	-0.0335	-60	1.04492
																		284	5e-08	0	1.06414	5e-08	0	2.00631	-0.0365	-60	0.794187
																		285	-0.018	-30	0.554296	0.00600004	0	1.38227	0.00250005	0	0.903304
																		286	-0.0115	-30	1.19439	0.0380001	30	0.920815	0.0495	30	0.676204
																		287	0.0430001	30	1.15026	0.0575	30	1.15405	-0.058	-60	0.866523
																		288	-0.068	-90	1.03336	-0.0454999	-60	1.28502	0.0195	0	0.368107
																		289	-0.015	-30	1.16313	-0.011	-30	0.788868	0.0375	30	0.272538
																		290	-0.021	-30	0.95743	0.00200005	0	0.669468	-0.00749996	-30	1.41731
																		291	0.059	30	0.830398	0.0365	30	1.03938	-0.0825	-90	0.450021
																		292	0.00050005	0	0.880643	0.00900004	0	1.34785	-0.0125	-30	0.734481
																		293	-0.018	-30	0.860536	-0.0195	-30	1.0189	-0.0675	-90	0.172899
																		294	-0.00149995	-30	1.08639	-0.0169999	-30	0.944359	-0.0115	-30	0.75109
																		295	0.0595	30	1.09299	0.0155	0	0.874138	-0.00649995	-30	1.30605
																		296	-0.0194999	-30	0.917106	-0.00949996	-30	0.995634	-0.023	-30	1.52143
																		297	-0.0315	-60	0.801497	-0.0144999	-30	0.949235	0.00950004	0	0.977069
																		298	0.0135	0	1.23187	0.00150004	0	0.891135	-0.0275	-30	1.67212
																		299	0.0515	30	1.2627	0.0220001	0	0.765466	0.0190001	0	1.72489
																		300	0.0330001	30	0.973303	-0.0384999	-60	0.718651	0.027	0	1.29291
																		301	0.0155	0	0.508824	-0.0609999	-90	0.770757	0.0540001	30	1.12541
																		302	-0.0244999	-30	1.15036	-0.0235	-30	0.514954	-0.029	-30	1.05745
																		303	0.017	0	1.31906	0.013	0	0.850174	-0.014	-30	1.64359
																		304	0.028	0	1.01132	-0.00999995	-30	0.698723	-0.00699996	-30	1.36667
																		305	-0.00499996	-30	0.722509	-0.03	-30	1.18428	0.0345001	30	0.667036
																		306	-0.00999996	-30	0.684116	0.0575	30	1.18372	0.0475001	30	0.941714
																		307	0.0205	0	0.754899	-0.00599996	-30	1.35886	0.012	0	0.864687
																		308	0.00650004	0	0.394661	-0.0264999	-30	0.949377	0.0455001	30	0.123382
																		309	-0.0255	-30	0.644542	-0.00249996	-30	0.897545	-0.0385	-60	0.685171
																		310	0.00350005	0	0.478046	0.0455001	30	1.03367	-0.0115	-30	0.451958
																		311	4e-08	0	0.646849	0.0355	30	0.791658	-0.0325	-60	1.52867
																		312	0.00950004	0	0.405011	-0.00049996	-30	0.485694	0.0175	0	1.00763
																		313	0.0295	0	0.77817	0.037	30	0.733699	-0.028	-30	0.995611
																		314	-0.0155	-30	0.612315	0.0445	30	0.804058	0.018	0	1.56759
																		315	-0.0805	-90	0.252132	0.00900005	0	1.04607	0.00900004	0	1.32847
																		316	0.053	30	0.801548	-0.00899996	-30	0.59395	0.00500004	0	1.17299
																		317	-0.00649995	-30	0.7638	-0.066	-90	0.977797	-0.025	-30	1.13102
																		318	-0.0125	-30	0.769966	-0.0185	-30	0.884031	0.0355	30	1.19235
																		319	-0.00649996	-30	0.370264	-0.00299996	-30	0.804893	0.05	30	0.310133
																		320	-0.053	-60	0.877051	0.0155	0	1.13384	-0.054	-60	0.853787
																		321	-0.00749996	-30	0.663043	0.00150004	0	1.11141	0.0195001	0	0.128884
																		322	0.00950004	0	0.771521	0.0470001	30	0.991731	-0.0389999	-60	0.925005
																		323	-0.00449996	-30	0.872922	-0.00449995	-30	1.1481	0.053	30	0.0378991
																		324	-0.044	-60	0.706853	0.00450005	0	0.401663	0.00050005	0	0.256136
																		325	0.017	0	0.720901	0.0320001	30	0.58825	0.0250001	0	1.38521
																		326	0.0525	30	0.822892	0.00350005	0	0.565394	-0.0169999	-30	1.45847
																		327	-0.031	-60	0.464854	0.0490001	30	0.491278	0.0120001	0	1.35088
																		328	-0.016	-30	0.65634	0.0490001	30	0.494481	-0.0585	-60	1.15445
																		329	-0.0165	-30	0.846432	0.0535	30	0.66505	0.0355	30	1.55648
																		330	-0.022	-30	0.9407	0.00300005	0	0.837267	-0.0169999	-30	1.48048
																		331	0.00400004	0	0.96676	-0.0259999	-30	0.608425	0.00300005	0	1.3412
																		332	0.00200004	0	1.1575	-0.0304999	-60	1.11745	-0.0124999	-30	1.07865
																		333	0.00700004	0	0.913086	-0.0395	-60	0.335599	0.0190001	0	1.41324
																		334	0.014	0	1.03508	-0.026	-30	0.615697	-0.021	-30	1.8443
																		335	0.016	0	1.19364	-0.0384999	-60	0.618988	0.019	0	0.882826
																		336	-0.0695	-90	1.03497	0.00100005	0	0.789817	0.0560001	30	0.194597
																		337	-0.0725	-90	0.998934	-0.00899995	-30	0.384262	-0.064	-90	0.270605
																		338	-0.037	-60	1.26785	0.042	30	0.691373	0.0260001	0	1.2383
																		339	-0.066	-90	1.43784	-0.027	-30	0.674316	0.00350005	0	0.448495
																		340	0.01	0	1.48352	-0.0245	-30	0.728863	0.0275001	0	0.773098
																		341	-0.04	-60	1.28512	0.00600004	0	0.331008	0.0340001	30	0.223124
																		342	-0.00349995	-30	1.24731	-0.00749996	-30	0.210485	0.0320001	30	0.492204
																		343	0.00750005	0	0.983705	0.038	30	0.795361	-0.0199999	-30	0.577173
																		344	-0.042	-60	0.634355	0.0225	0	0.549809	-0.0749999	-90	0.432908
																		345	-0.0535	-60	1.14425	-0.0135	-30	0.624617	-0.0169999	-30	0.768815
																		346	0.0195	0	0.948475	0.00450005	0	0.363653	0.00700005	0	0.297093
																		347	0.0390001	30	0.887775	0.00850004	0	0.541754	0.0400001	30	0.13897
																		348	-0.0265	-30	0.293798	-0.0104999	-30	0.874757	-0.0209999	-30	1.02151
																		349	-0.0155	-30	1.11696	-0.00099995	-30	0.661242	-0.0745	-90	1.08973
																		350	-0.04	-60	1.20806	-0.027	-30	0.929132	-0.0464999	-60	1.0226
																		351	-0.047	-60	0.83603	-0.059	-60	1.4689	0.0405001	30	0.298819
																		352	-0.0855	-90	1.1183	0.0495	30	1.48924	-0.0455	-60	0.820315
																		353	-0.078	-90	0.713502	0.0235001	0	1.40101	0.017	0	1.58211
																		354	0.00700005	0	0.480511	0.00500004	0	1.68155	-0.0129999	-30	0.689127
																		355	-0.00299996	-30	0.873563	-0.00599996	-30	1.50258	-0.00849995	-30	1.57717
																		356	-0.00849996	-30	0.996146	-0.012	-30	1.35262	0.00950005	0	1.66024
																		357	0.0395001	30	0.890187	0.00850005	0	1.60509	0.00700005	0	1.34102
																		358	0.0275001	0	0.703957	0.00650005	0	0.868351	-0.0605	-90	2.02153
																		359	-0.00399995	-30	0.894585	-0.0255	-30	1.40379	0.0230001	0	1.45528
																		360	-0.0785	-90	0.943542	-0.0395	-60	1.30612	-0.00549995	-30	1.26042
																		361	0.00850004	0	0.560463	-0.0305	-60	1.35218	-0.00149995	-30	0.682294
																		362	-0.041	-60	0.612263	-0.00049995	-30	1.54396	0.00400005	0	1.19231
																		363	0.022	0	0.828576	-0.00399996	-30	0.646781	0.019	0	0.586249
																		364	-0.032	-60	0.817529	0.00950005	0	0.641152	-0.0104999	-30	1.11379
																		365	0.00550005	0	0.863377	0.05	30	1.1617	4e-08	0	0.503279
																		366	-0.026	-30	0.859515	-0.00499995	-30	1.58388	0.00800005	0	0.593877
																		367	0.0195	0	0.744978	0.0250001	0	1.55496	-0.00699995	-30	0.789522
																		368	-0.046	-60	0.596122	-0.0239999	-30	1.48084	0.0175	0	1.15557
																		369	0.0320001	30	1.1435	-0.019	-30	1.13884	-0.00899995	-30	1.12864
																		370	0.0155	0	1.19836	-0.00399996	-30	0.880037	-0.0154999	-30	1.14122
																		371	-0.00799996	-30	1.20715	0.0380001	30	1.51219	-0.0199999	-30	0.959132
																		372	-0.0645	-90	0.93228	-0.0265	-30	1.70319	-0.014	-30	1.14547
																		373	-0.0105	-30	0.77726	-0.0265	-30	2.1368	-0.0165	-30	0.427733
																		374	0.0565001	30	1.10945	-0.0195	-30	1.56743	0.00300005	0	1.03656
																		375	0.00950005	0	1.04687	-0.036	-60	1.85021	0.00450005	0	0.215255
																		376	-0.0199999	-30	1.13149	-0.0375	-60	1.6263	-0.0575	-60	0.349613
																		377	0.046	30	1.2093	0.0540001	30	1.06663	-0.057	-60	0.977845
																		378	-0.0155	-30	1.17691	-0.0265	-30	1.60717	-0.014	-30	0.145149
																		379	-0.00799996	-30	1.0547	0.0110001	0	1.18187	-0.00749996	-30	0.901209
																		380	-0.0555	-60	0.99872	0.059	30	1.0739	0.00350004	0	0.328125
																		381	-0.0195	-30	1.10961	-0.00149995	-30	0.745226	-0.0265	-30	0.585756
																		382	-0.012	-30	1.1976	0.0190001	0	0.66808	-0.08	-90	0.711601
																		383	0.0230001	0	0.967672	-0.0109999	-30	1.04056	-0.0235	-30	0.758139
																		384	0.0480001	30	1.2057	-0.0305	-60	1.38586	0.0385001	30	0.405651
																		385	-0.00349996	-30	0.954857	5e-08	0	0.677258	-0.065	-90	1.50766
																		386	0.028	0	1.15766	0.0105001	0	0.527815	-0.0225	-30	0.625659
																		387	0.00050005	0	0.978021	-0.0315	-60	0.669121	-0.00199995	-30	1.08042
																		388	-0.013	-30	1.02339	0.00900005	0	0.893372	-0.0689999	-90	1.59796
																		389	-0.0405	-60	0.568237	0.00950005	0	1.60986	-0.0125	-30	1.11814
																		390	-0.014	-30	0.989497	0.00300005	0	0.971125	-0.03	-30	1.49122
																		391	0.00800004	0	0.87839	0.00400005	0	0.753195	-0.0255	-30	0.741897
																		392	-0.00849996	-30	0.763692	0.00950005	0	1.00766	-0.0215	-30	0.530111
																		393	-0.012	-30	0.843214	-0.0325	-60	1.61167	-0.0465	-60	1.11468
																		394	-0.0215	-30	0.707496	0.0490001	30	0.815276	-0.0505	-60	0.578527
																		395	-0.0445	-60	0.774738	-0.0125	-30	0.770425	-0.00849995	-30	0.800313
																		396	-0.00749996	-30	0.652641	-0.0295	-30	0.972943	0.00800005	0	0.45021
																		397	-0.0285	-30	0.562661	0.0115	0	0.570154	0.00450005	0	0.330105
																		398	-0.026	-30	1.25471	-0.00249995	-30	0.709122	-0.013	-30	0.329216
																		399	-0.0415	-60	1.16586	-0.0145	-30	0.66661	0.0335001	30	1.0723
																		400	-0.0865	-90	0.835492	0.0390001	30	0.85242	-0.0855	-90	0.770017
																		401	0.00850004	0	1.14736	-0.016	-30	1.05814	-0.00599996	-30	0.808931
																		402	-0.09	-90	0.921502	0.00900005	0	0.798562	-0.00549996	-30	0.31664
																		403	-0.0515	-60	1.04162	-0.00849996	-30	1.15408	-0.0145	-30	0.71457
																		404	-0.077	-90	0.917053	-0.00299995	-30	1.14819	-0.0195	-30	1.72578
																		405	0.00900004	0	1.05529	0.0165	0	0.892174	-0.0235	-30	1.2022
																		406	-0.0295	-30	1.0414	0.0460001	30	1.14993	-0.0345	-60	1.15963
																		407	-0.0195	-30	1.1879	-0.0425	-60	1.03845	0.00150005	0	0.636947
																		408	-0.00899996	-30	1.17498	0.00250004	0	0.304807	-0.047	-60	1.04349
																		409	-0.0145	-30	1.38207	-0.0395	-60	0.693295	-0.0285	-30	1.47578
																		410	-0.028	-30	1.39172	0.00450004	0	0.843276	0.0465001	30	1.81984
																		411	-0.04	-60	1.00553	0.0250001	0	0.739918	0.014	0	0.830315
																		412	-0.0585	-60	0.910081	-0.0325	-60	0.719671	-0.00199995	-30	0.585659
																		413	-0.024	-30	0.854957	-0.0325	-60	0.258044	0.017	0	1.93311
																		414	0.00950004	0	1.13621	-0.021	-30	0.370241	0.0225	0	1.64687
																		415	-0.073	-90	1.39156	0.0185001	0	0.272872	-0.00449995	-30	1.44518
																		416	-0.00249996	-30	0.934587	-0.0145	-30	1.29364	0.0435	30	1.04718
																		417	-0.078	-90	0.871527	-0.035	-60	1.10089	-0.00549994	-30	1.08675
																		418	0.00700004	0	0.885255	-0.0505	-60	1.4908	-0.00999995	-30	0.721856
																		419	-0.0545	-60	0.555315	-0.021	-30	1.11215	0.0165001	0	0.509384
																		420	0.0455	30	1.40143	-0.058	-60	1.26356	0.0410001	30	1.0398
																		421	0.0285	0	1.25772	0.0190001	0	0.974576	0.00800005	0	0.861044
																		422	0.0280001	0	0.858925	-0.0405	-60	1.1257	0.0500001	30	0.79458
																		423	-0.0845	-90	1.10242	-0.035	-60	0.682602	0.0495001	30	1.05248
																		424	-0.0109999	-30	0.863751	0.03	30	0.44295	0.0230001	0	1.37781
																		425	-0.033	-60	0.764175	-0.034	-60	0.413865	0.0215	0	1.89973
																		426	-0.00699996	-30	1.02537	-0.0505	-60	1.10716	-0.00249995	-30	1.74981
																		427	-0.012	-30	1.19503	-0.0529999	-60	0.789955	-0.00599995	-30	1.07937
																		428	-0.0765	-90	1.00151	-0.0344999	-60	0.980565	-0.00249995	-30	0.928896
																		429	-0.0215	-30	1.29745	0.00850004	0	1.15777	0.0115	0	0.850174
																		430	0.0255	0	1.65565	-0.0205	-30	0.82232	-0.023	-30	1.08605
																		431	-0.0295	-30	1.41982	-0.04	-60	0.585372	0.034	30	1.53776
																		432	-0.0565	-60	1.03197	-0.0145	-30	0.763009	0.0405001	30	0.855611
																		433	-0.089	-90	1.23541	-0.0155	-30	0.695435	0.0145	0	1.60617
																		434	-0.0635	-90	1.02639	-0.0275	-30	0.589937	-0.00899995	-30	1.06195
																		435	-0.031	-60	1.36405	-0.0245	-30	0.832153	0.0320001	30	0.618334
																		436	-0.0105	-30	1.38662	-0.0455	-60	0.252625	-0.00699996	-30	0.693989
																		437	-0.018	-30	1.46384	-0.044	-60	0.828019	0.0410001	30	1.12395
																		438	-0.014	-30	1.4536	-0.039	-60	0.323054	0.0250001	0	1.03924
																		439	-0.0215	-30	0.948207	-0.028	-30	0.560426	0.028	0	0.907297
																		440	-0.0525	-60	0.960218	-0.0815	-90	1.34667	0.0445	30	0.928061
																		441	-0.049	-60	1.07765	-0.00449996	-30	1.79775	-0.029	-30	1.12883
																		442	0.0265001	0	1.48181	-0.082	-90	0.66008	-0.0225	-30	1.03799
																		443	-0.072	-90	1.27289	0.019	0	0.69586	-0.013	-30	1.31107
																		444	-0.0239999	-30	1.27858	-0.0635	-90	0.902297	0.019	0	0.590051
																		445	4e-08	0	1.37424	-0.089	-90	1.16505	0.0115	0	1.36192
																		446	0.00200005	0	0.977162	0.0275	0	0.53633	-0.00299996	-30	1.00176
																		447	-0.0125	-30	1.27005	0.0180001	0	0.874497	0.00550004	0	1.3551
																		448	0.0225	0	1.53714	-0.0335	-60	1.27468	0.0145001	0	1.07421
																		449	0.0425	30	1.6253	-0.00599996	-30	0.818895	0.057	30	1.21159
																		450	-0.0215	-30	1.64659	-0.0515	-60	1.00608	-0.0124999	-30	0.955367
																		451	-0.00399996	-30	1.86403	-0.0295	-30	0.967022	-0.00749996	-30	0.914264
																		452	-0.047	-60	1.10704	-0.0235	-30	0.969731	0.0465001	30	0.819384
																		453	-0.0805	-90	0.805358	0.0505001	30	0.123979	0.0185001	0	0.963448
																		454	0.0485001	30	1.37016	0.00850005	0	0.398227	0.0415	30	0.975711
																		455	0.017	0	1.17079	0.044	30	0.487851	0.00250004	0	0.577373
																		456	0.014	0	1.37268	0.0460001	30	0.571102	-0.0204999	-30	0.954248
																		457	-0.0115	-30	1.15578	0.00300005	0	0.557899	0.021	0	0.707644
																		458	-0.0285	-30	1.41724	-0.023	-30	0.440633	0.0495	30	0.871353
																		459	-0.022	-30	1.61195	-0.018	-30	0.683554	-0.00249996	-30	0.723107
																		460	-0.0145	-30	1.28791	-0.00449995	-30	0.475099	-0.00049996	-30	1.06209
																		461	-0.0345	-60	1.0732	0.00100005	0	0.925133	0.00400005	0	1.12632
																		462	-0.0265	-30	1.35338	-0.0404999	-60	1.01364	-0.03	-30	1.49582
																		463	-0.017	-30	1.17256	0.0245	0	0.601424	-0.00449995	-30	1.27303
																		464	-0.0235	-30	1.05674	0.0365001	30	0.67628	-0.027	-30	0.853657
																		465	-0.0285	-30	0.998987	0.0465001	30	0.632421	0.0555	30	0.739552
																		466	-0.0605	-90	1.26045	-0.00149995	-30	1.54971	-0.0169999	-30	1.09024
																		467	0.00300004	0	1.20887	0.0385	30	1.18293	-0.0149999	-30	0.508827
																		468	-0.00949996	-30	0.916194	0.0160001	0	0.989583	-0.0149999	-30	0.719208
																		469	0.00950004	0	1.05256	0.0335	30	1.18797	-0.0254999	-30	1.16645
																		470	0.024	0	0.937643	0.0450001	30	1.27614	-0.00749996	-30	0.953417
																		471	-0.02	-30	0.927617	-0.041	-60	1.0293	0.0315001	30	0.676015
																		472	-0.0365	-60	0.868202	-0.012	-30	0.423514	-0.00549995	-30	0.750277
																		473	-0.044	-60	1.47494	0.0380001	30	0.1336	-0.0149999	-30	1.23319
																		474	-0.00699996	-30	1.34909	5e-08	0	0.759528	-0.022	-30	0.868426
																		475	-0.065	-90	0.483729	-0.00549995	-30	0.743417	-0.00149995	-30	1.45053
																		476	0.024	0	0.782406	-0.0315	-60	1.29337	0.0585	30	0.75376
																		477	-0.0175	-30	0.676502	0.0535001	30	0.797685	-0.0305	-60	0.695244
																		478	-0.00749996	-30	0.911155	0.0400001	30	1.46188	0.0490001	30	1.18401
																		479	-0.0425	-60	0.866433	-0.00999996	-30	1.17118	0.0240001	0	0.524847
																		480	0.037	30	0.866702	-0.0225	-30	0.852734	-0.0139999	-30	0.76017
																		481	0.00350004	0	1.04564	0.0330001	30	1.11479	0.05	30	0.847247
																		482	0.048	30	0.894102	0.043	30	1.11445	-0.023	-30	0.839303
																		483	-0.033	-60	0.776777	-0.031	-60	0.548498	0.019	0	1.05457
																		484	-0.00949996	-30	1.3456	0.0275	0	0.550288	-0.02	-30	0.786782
																		485	0.026	0	1.3989	0.0270001	0	0.650321	-0.00199995	-30	0.685351
																		486	-0.027	-30	1.09637	0.00750005	0	0.286446	-0.0224999	-30	1.04942
																		487	0.00850004	0	1.30238	-0.0185	-30	0.834944	0.0460001	30	1.13733
																		488	-0.0765	-90	0.972766	-0.03	-30	0.946615	-0.0319999	-60	0.593393
																		489	-0.069	-90	0.911262	-0.0394999	-60	0.97	0.0230001	0	1.43869
																		490	0.04	30	1.21997	0.0465	30	0.87422	0.0440001	30	0.666261
																		491	-0.043	-60	1.27761	-0.00899995	-30	0.828568	-0.0124999	-30	0.60245
																		492	-0.00849996	-30	1.36437	-0.00349995	-30	0.830805	0.0590001	30	0.949307
																		493	-0.05	-60	0.679505	0.00050004	0	0.241579	0.018	0	0.23144
																		494	-0.0385	-60	0.586684	0.00350004	0	0.827897	0.00350005	0	0.667129
																		495	-0.0115	-30	1.32748	-0.036	-60	0.651666	0.0220001	0	0.593275
																		496	0.0275	0	1.23123	-0.033	-60	0.901744	0.0190001	0	0.290488
																		497	0.0460001	30	1.33713	-0.0175	-30	1.31217	0.0525	30	0.45907
																		498	-0.022	-30	1.10382	0.0195001	0	1.02718	0.00250005	0	0.274903
																		499	0.0305	30	1.21557	-0.0265	-30	0.752704	0.057	30	0.483657
																		500	-0.025	-30	1.08275	0.00200004	0	0.423291	-0.00599995	-30	0.601324
																		501	-0.0175	-30	1.28008	0.034	30	0.744535	0.0485001	30	0.548944
																		502	-0.054	-60	0.923862	-0.00449996	-30	0.610037	0.0145001	0	0.487814
																		503	0.00050004	0	0.832168	0.0275	0	0.671693	0.0305	30	0.308932
																		504	-0.059	-60	0.674088	0.00100005	0	0.638911	0.0205	0	0.18503
																		505	-0.09	-90	0.771145	0.0225001	0	0.633202	0.00600005	0	0.354129
																		506	-0.028	-30	1.16372	0.00700004	0	0.875228	0.00750005	0	0.595698
																		507	0.00250004	0	0.962578	0.0415	30	1.45998	0.044	30	0.467122
																		508	-0.0495	-60	1.00768	-0.0364999	-60	1.12039	-0.00299996	-30	0.602711
																		509	-0.074	-90	0.765408	-0.0319999	-60	1.34507	0.0395001	30	0.165115
																		510	-0.0255	-30	1.20168	0.00100005	0	1.78234	0.0155	0	0.516645
																		511	-0.043	-60	1.53843	-0.0299999	-30	1.25354	0.014	0	0.158448
																		512	-0.0855	-90	1.35874	-0.028	-30	1.15126	0.0215	0	0.841338
																		513	0.0345	30	1.69683	-0.0125	-30	0.801264	-0.026	-30	1.03381
																		514	-0.029	-30	1.52803	-0.00399995	-30	0.894921	-0.027	-30	1.4431
																		515	-0.0275	-30	1.32367	0.0270001	0	1.24805	-0.0109999	-30	1.40967
																		516	0.00300004	0	1.35097	0.0205	0	0.62548	0.0275	0	0.849302
																		517	-0.0265	-30	1.29386	-0.00249996	-30	1.24711	0.0565	30	1.141
																		518	-0.00699995	-30	1.24844	-0.019	-30	0.66949	0.0355	30	1.36569
																		519	0.0225	0	1.17605	-0.044	-60	0.824924	0.0585	30	0.805924
																		520	-0.0265	-30	1.39258	-0.0755	-90	0.659506	0.0130001	0	0.985932
																		521	-0.02	-30	0.855815	-0.0335	-60	0.421271	0.0330001	30	0.907487
																		522	-0.0245	-30	1.09937	-0.037	-60	0.83401	0.015	0	1.88458
																		523	-0.0885	-90	0.813669	-0.043	-60	0.709986	0.0405	30	1.47851
																		524	-0.0165	-30	1.25965	-0.041	-60	0.464849	-0.0469999	-60	1.00991
																		525	-0.0225	-30	1.08564	-0.0115	-30	0.834914	-0.00099995	-30	1.49374
																		526	-0.069	-90	1.02553	-0.00499996	-30	0.473929	0.0395	30	0.925582
																		527	0.00250005	0	0.909196	-0.04	-60	0.582149	-0.0274999	-30	0.851555
																		528	0.037	30	0.771647	-0.00099996	-30	0.545651	0.0365001	30	1.34335
																		529	-0.02	-30	1.31883	-0.0215	-30	0.196287	0.0575	30	0.951988
																		530	-0.0134999	-30	1.24416	-0.032	-60	0.615017	0.014	0	1.47781
																		531	0.00350004	0	0.932511	-0.088	-90	0.771177	-0.0125	-30	1.18005
																		532	-0.0245	-30	1.08114	-0.0815	-90	0.653145	-0.014	-30	1.6702
																		533	-0.035	-60	0.848913	-0.023	-30	0.48737	0.0515	30	1.15321
																		534	0.0315001	30	0.848046	-0.0385	-60	0.533121	-0.0319999	-60	1.5721
																		535	-0.0395	-60	0.499568	-0.029	-30	0.699818	0.0135	0	1.37694
																		536	-0.00549996	-30	0.654669	-0.042	-60	0.84381	0.0435	30	1.51505
																		537	0.00050004	0	0.668771	-0.0745	-90	0.342825	0.05	30	1.46933
																		538	0.057	30	0.550067	-0.0155	-30	0.897741	-0.0159999	-30	0.689554
																		539	-0.0229999	-30	1.31682	-0.015	-30	0.629	-0.00449995	-30	1.03624
																		540	-0.0125	-30	0.755103	-0.035	-60	0.911545	0.00050005	0	0.589637
																		541	-0.0289999	-30	0.495678	-0.024	-30	0.976913	-0.0474999	-60	0.935799
																		542	-0.0195	-30	0.968767	-0.0555	-60	1.07569	-0.00949995	-30	0.954763
																		543	0.0280001	0	0.702298	0.00200005	0	1.19117	-0.0214999	-30	0.61951
																		544	0.0390001	30	0.899701	-0.0275	-30	0.50262	-0.026	-30	0.550935
																		545	-0.013	-30	0.690063	-0.0189999	-30	0.268925	0.00750005	0	0.524524
																		546	0.00250004	0	0.84186	-0.024	-30	1.03447	-0.00349995	-30	1.52284
																		547	0.024	0	1.1869	-0.0419999	-60	0.717793	-0.016	-30	1.19806
																		548	-0.00899995	-30	0.695103	-0.0189999	-30	0.773355	-0.0209999	-30	0.835967
																		549	-0.015	-30	0.447766	-0.039	-60	0.896105	-0.0515	-60	1.15416
																		550	-0.0155	-30	1.08891	-0.00149996	-30	0.98363	-0.00899995	-30	1.01277
																		551	-0.00799996	-30	0.454669	-0.025	-30	0.340285	-0.021	-30	0.916146
																		552	0.018	0	0.461576	-0.0279999	-30	0.761371	-0.0155	-30	0.791029
																		553	-0.015	-30	0.841431	0.0165	0	1.01649	0.00450004	0	0.559941
																		554	0.0435	30	1.3256	-0.00849995	-30	0.414916	-0.03	-30	1.08819
																		555	-0.0205	-30	1.19754	-0.033	-60	0.490994	0.0445	30	0.704793
																		556	-0.0145	-30	1.24416	-0.0215	-30	0.882848	0.0575	30	1.62102
																		557	0.00350004	0	1.57854	-0.00199995	-30	0.449593	-0.00449995	-30	0.9758
																		558	0.0135	0	0.872798	-0.026	-30	0.708172	-0.0245	-30	0.976149
																		559	-0.0375	-60	1.11625	-0.00699996	-30	2.22855	0.00400005	0	1.03347
																		560	-0.00099995	-30	0.926608	0.052	30	0.875041	0.00950005	0	0.620807
																		561	-0.0129999	-30	0.945891	-0.034	-60	1.25655	0.0285	0	0.780469
																		562	-0.046	-60	0.758121	-0.0335	-60	0.710165	0.014	0	0.491709
																		563	0.058	30	0.662439	-0.00399995	-30	1.99449	-0.00649995	-30	0.558638
																		564	-0.00649995	-30	0.780275	-0.0145	-30	0.83564	0.0130001	0	1.48119
																		565	-0.0285	-30	1.00848	-0.085	-90	0.942045	0.0320001	30	1.40465
																		566	-0.00849996	-30	0.779846	0.00700005	0	1.24511	-0.0115	-30	1.21209
																		567	-0.03	-30	0.620996	-0.027	-30	0.80132	0.0295	0	1.27083
																		568	-0.0235	-30	1.1984	-0.00299995	-30	0.789878	0.0270001	0	1.39115
																		569	0.0205	0	0.520426	0.0110001	0	1.54254	-0.0315	-60	1.4362
																		570	0.0400001	30	0.968046	-0.0265	-30	0.241686	0.014	0	1.33127
																		571	0.0255	0	0.881718	0.0385001	30	0.644087	-0.00549995	-30	1.14836
																		572	4e-08	0	0.54532	0.0535001	30	1.4675	0.033	30	1.24046
																		573	-0.027	-30	0.50532	0.0365	30	1.11491	0.012	0	1.63394
																		574	0.021	0	0.679559	-0.0425	-60	1.91748	-0.0145	-30	0.804353
																		575	-0.043	-60	1.08646	-0.016	-30	1.49086	-0.0365	-60	0.97971
																		576	-0.00649996	-30	0.789488	0.0415	30	0.900715	0.031	30	1.23804
																		577	-0.0285	-30	0.847329	-0.03	-30	1.23608	0.05	30	0.629285
																		578	-0.013	-30	0.771647	-0.035	-60	1.31305	0.016	0	0.41358
																		579	-0.0175	-30	1.16963	0.0285	0	0.728958	-0.00449996	-30	0.336027
																		580	-0.0135	-30	1.73566	0.043	30	0.894916	0.0460001	30	0.364822
																		581	-0.0195	-30	1.63236	-0.0415	-60	0.938275	0.0120001	0	0.597061
																		582	-0.0165	-30	0.910926	-0.00849996	-30	0.367882	0.0105	0	0.753316
																		583	0.00600004	0	1.15107	0.015	0	0.556193	0.045	30	1.05855
																		584	-0.0194999	-30	0.822723	0.0115	0	0.31091	0.0265	0	0.700709
																		585	-0.035	-60	1.1292	0.0335001	30	0.424433	0.0260001	0	0.44409
																		586	-0.0319999	-60	1.79034	-0.0215	-30	1.03575	0.0165	0	0.335172
																		587	-0.0199999	-30	1.24733	-0.025	-30	0.490145	0.0495	30	0.177637
																		588	-0.0255	-30	1.73365	-0.023	-30	0.625518	-0.0305	-60	0.153541
																		589	-0.0395	-60	1.04114	0.0145	0	0.460568	0.0555001	30	0.270587
																		590	0.0135	0	1.75135	-0.023	-30	0.437625	0.0175	0	0.178347
																		591	-0.035	-60	1.37366	-0.00549996	-30	0.392168	-0.0105	-30	0.828734
																		592	0.041	30	0.974807	0.01	0	1.30179	-0.0135	-30	0.994963
																		593	-0.029	-30	1.6653	-0.034	-60	1.15087	-0.0335	-60	1.05712
																		594	-0.0285	-30	0.910205	-0.0255	-30	1.09608	-0.00199995	-30	1.39828
																		595	-0.025	-30	1.33581	0.0295	0	1.22078	0.0285	0	1.28252
																		596	-0.0125	-30	0.941572	0.011	0	0.504263	0.022	0	1.66545
																		597	0.0255	0	1.09755	-0.00849996	-30	0.668962	0.0180001	0	1.22008
																		598	-0.0445	-60	1.10373	-0.0355	-60	0.668034	-0.045	-60	1.13154
																		599	-0.0215	-30	1.73509	-0.0515	-60	1.12617	-0.0294999	-30	1.16747
																		600	-0.0365	-60	0.805023	-0.0239999	-30	1.5001	0.0460001	30	1.3903
																		601	0.0295	0	1.0715	0.0235	0	1.29742	0.0395001	30	1.07109
																		602	-0.029	-30	1.17941	-0.02	-30	0.673833	-0.00749996	-30	1.63437
																		603	-0.013	-30	1.47121	-0.0175	-30	0.698708	-0.0355	-60	0.897878
																		604	0.00500004	0	1.47265	-0.025	-30	1.37968	0.00400004	0	1.16348
																		605	0.00800004	0	1.48876	0.00150005	0	1.02609	0.00300004	0	1.81528
																		606	0.0240001	0	1.80257	0.027	0	0.492497	-0.0815	-90	1.6231
																		607	-0.00399996	-30	1.69293	-0.022	-30	0.949452	0.012	0	0.704843
																		608	-0.0204999	-30	1.3948	-0.0205	-30	0.617954	0.0245	0	1.30661
																		609	-0.02	-30	1.28359	-0.035	-60	0.494683	0.0245	0	0.792805
																		610	-0.023	-30	0.919125	-0.018	-30	1.07625	-0.00599996	-30	0.725375
																		611	-0.035	-60	1.66746	-0.0365	-60	0.928949	-0.026	-30	0.844841
																		612	0.0405001	30	1.90559	-0.0365	-60	0.709882	0.0235	0	1.09633
																		613	-0.0119999	-30	2.28357	-0.00699995	-30	1.00819	-0.00399996	-30	0.998242
																		614	0.00900005	0	2.05552	-0.00249996	-30	0.224024	-0.00599996	-30	0.551443
																		615	0.0215	0	1.03553	-0.06	-60	1.10356	0.0340001	30	0.771418
																		616	0.0235001	0	1.19207	0.026	0	0.749295	0.057	30	1.15321
																		617	-0.033	-60	1.23409	-0.046	-60	0.576864	0.0125	0	0.750891
																		618	0.00350005	0	1.43495	-0.0305	-60	0.46855	-0.024	-30	0.899158
																		619	0.057	30	1.21826	-0.019	-30	0.445861	-0.086	-90	0.611748
																		620	-0.04	-60	1.10761	-0.034	-60	0.772571	0.0380001	30	0.53847
																		621	-0.0195	-30	0.688913	-0.021	-30	1.02575	0.0435	30	0.557857
																		622	-0.00799996	-30	1.12805	-0.028	-30	1.18759	0.0545001	30	0.56869
																		623	-0.0169999	-30	1.17653	-0.037	-60	0.638291	0.00300004	0	0.682317
																		624	-0.0375	-60	1.14013	0.03	30	0.50586	0.0480001	30	0.735639
																		625	-0.00349996	-30	1.19783	-0.021	-30	1.13986	0.00100005	0	0.6625
																		626	-0.0325	-60	1.32718	-0.014	-30	0.564429	-0.0825	-90	1.46871
																		627	0.0360001	30	1.39754	-0.0395	-60	0.991635	-0.0315	-60	0.706408
																		628	0.00800005	0	2.37796	0.00050005	0	0.726676	-0.00899996	-30	0.981275
																		629	-0.0225	-30	1.27941	0.0190001	0	0.104639	-0.0475	-60	0.908286
																		630	0.0275	0	1.15596	-0.0185	-30	0.612484	0.0560001	30	0.548738
																		631	0.0295	0	1.23984	0.00200004	0	0.423251	-0.00699996	-30	1.13511
																		632	0.0275	0	1.22099	0.0190001	0	0.24528	-0.0115	-30	1.25871
																		633	-0.0145	-30	1.75394	0.0125001	0	0.36262	-0.00299996	-30	0.423993
																		634	0.019	0	1.2374	-0.046	-60	0.179601	0.0175	0	1.40969
																		635	0.0495	30	1.5679	0.00850005	0	0.593569	0.0275	0	1.13767
																		636	-0.0295	-30	1.16876	0.0335001	30	0.328749	0.0425	30	1.20268
																		637	-0.077	-90	1.79681	0.0205	0	0.594773	-0.00699996	-30	1.63009
																		638	0.015	0	1.12862	-0.026	-30	1.50676	0.00550004	0	0.742912
																		639	-0.0235	-30	1.9184	-0.019	-30	1.3063	-0.0235	-30	1.35537
																		640	0.02	0	1.50128	0.00950004	0	0.412414	0.0315001	30	0.954049
																		641	0.043	30	0.72747	-0.037	-60	0.332635	-0.015	-30	1.1371
																		642	-0.026	-30	1.29481	0.00050005	0	0.723336	0.00300004	0	1.11115
																		643	-0.00099995	-30	1.26617	0.00800005	0	0.471724	0.022	0	1.10018
																		644	-0.0234999	-30	0.729776	-0.0264999	-30	0.700537	-0.044	-60	1.75084
																		645	0.00050005	0	0.733661	-0.0274999	-30	0.330926	-0.0255	-30	1.36492
																		646	0.0115	0	1.40717	-0.0899999	-90	0.295619	0.0325001	30	0.681602
																		647	0.0455001	30	1.96516	-0.00349995	-30	0.356134	0.00900005	0	0.618302
																		648	-0.0385	-60	1.07797	-0.086	-90	1.21751	-0.0165	-30	1.52701
																		649	-0.032	-60	0.964161	0.00900005	0	0.511342	0.0185	0	1.2513
																		650	-0.023	-30	1.37927	-0.0325	-60	0.43731	0.0425	30	0.629855
																		651	-0.035	-60	1.3879	0.0125001	0	0.920842	-0.029	-30	1.19299
																		652	0.0205	0	1.54041	0.034	30	0.381846	-0.00099996	-30	1.04743
																		653	-0.0165	-30	0.712656	0.02	0	1.24023	0.028	0	0.583948
																		654	-0.0225	-30	1.663	-0.0185	-30	0.315079	0.02	0	0.929243
																		655	-0.015	-30	1.29308	-0.0515	-60	0.861339	-0.00199996	-30	2.16258
																		656	-0.04	-60	0.822152	-0.0265	-30	0.350345	0.0515	30	1.57977
																		657	-0.00999996	-30	0.962723	-0.059	-60	0.644878	0.0345	30	0.339595
																		658	-0.0215	-30	0.864594	-0.034	-60	0.93265	0.0330001	30	0.476664
																		659	-0.0165	-30	0.700855	-0.0255	-30	0.604172	-0.00699995	-30	0.444773
																		660	-0.0105	-30	1.43826	-0.0265	-30	0.738912	0.0490001	30	0.205324
																		661	-0.00849996	-30	0.911073	-0.00699995	-30	0.570108	0.033	30	0.432131
																		662	0.00900005	0	0.976103	-0.0225	-30	0.465703	0.0375001	30	0.795445
																		663	-0.024	-30	1.29811	0.00550005	0	1.60002	0.0380001	30	0.877798
																		664	-0.0265	-30	1.07683	0.0345001	30	0.675305	0.0565001	30	0.607467
																		665	0.00800005	0	1.99106	-0.0129999	-30	1.28973	0.00400005	0	0.820509
																		666	0.01	0	0.864307	0.015	0	0.79369	0.0130001	0	0.697989
																		667	-0.0239999	-30	1.13107	0.0135	0	1.00519	0.0375001	30	0.838303
																		668	-0.0104999	-30	1.31135	0.0335001	30	0.66255	0.0445	30	1.07507
																		669	0.0495	30	2.14089	-0.022	-30	1.04391	0.018	0	1.02203
																		670	0.035	30	1.56025	0.0165	0	0.933645	0.0265001	0	0.436047
																		671	0.00500005	0	1.58735	-0.0355	-60	1.31431	0.0585	30	0.755275
																		672	-0.014	-30	1.48598	-0.0705	-90	1.48917	-0.0345	-60	0.733906
																		673	-0.0669999	-90	1.68414	0.00750005	0	1.06525	0.015	0	0.811335
																		674	0.0435	30	1.75699	0.027	0	0.54926	0.021	0	0.86773
																		675	-0.03	-30	1.42475	0.0175	0	0.839375	0.0125001	0	0.675832
																		676	-0.0555	-60	1.16209	-0.00149995	-30	1.89604	0.012	0	0.598737
																		677	-0.00499995	-30	1.18348	0.0215	0	1.00658	0.0385001	30	0.234638
																		678	-0.023	-30	1.84319	0.05	30	1.04704	-0.00749995	-30	0.725514
																		679	0.00300005	0	1.62362	0.025	0	0.517956	0.0490001	30	1.31855
																		680	0.00700005	0	1.47324	0.0540001	30	0.560279	0.0490001	30	0.797238
																		681	0.05	30	1.4058	0.00800004	0	0.889004	0.058	30	0.777098
																		682	-0.0265	-30	1.21395	0.049	30	0.581495	0.0565	30	0.337916
																		683	0.00650005	0	0.99245	-0.085	-90	0.892826	0.024	0	0.908909
																		684	-0.081	-90	1.14324	0.0485001	30	1.06989	0.0470001	30	0.595382
																		685	0.00600005	0	0.551192	0.0505	30	0.534305	0.0555001	30	0.849826
																		686	-0.0185	-30	1.06662	0.00300005	0	1.52105	0.0510001	30	1.09677
																		687	0.045	30	0.704224	0.0515	30	0.99104	0.0335	30	0.804959
																		688	-0.00849995	-30	0.974725	-0.027	-30	1.39466	-0.0204999	-30	0.707163
																		689	0.0570001	30	1.5846	0.0155	0	0.979098	0.0465001	30	1.03848
																		690	0.00800005	0	1.21201	0.0575	30	0.528275	0.0135	0	1.20509
																		691	0.0270001	0	1.41201	0.0435	30	0.658256	0.0460001	30	0.807981
																		692	-0.0219999	-30	1.08333	0.0165	0	0.674374	0.031	30	1.48873
																		693	-0.0234999	-30	1.30911	-0.00349996	-30	0.746264	0.0175	0	1.11792
																		694	-0.05	-60	0.939677	-0.0175	-30	0.459979	0.0480001	30	0.48528
																		695	-0.0845	-90	0.860207	0.0135	0	0.575701	-0.032	-60	0.941353
																		696	-0.0455	-60	0.382065	0.0165	0	0.781053	0.0585	30	1.62155
																		697	-0.069	-90	1.50381	-0.0479999	-60	0.658139	0.0345	30	0.762439
																		698	-0.0155	-30	0.820368	0.0320001	30	0.676695	0.0485001	30	0.706158
																		699	-0.024	-30	0.735703	-0.0335	-60	0.994748	0.0250001	0	0.692167
																		700	-0.077	-90	1.23025	-0.014	-30	0.992199	-0.089	-90	0.522429
																		701	-0.0614999	-90	0.779107	-0.0895	-90	1.28544	0.0435	30	1.17085
																		702	-0.069	-90	1.24349	-0.0439999	-60	1.1616	0.0555001	30	0.207785
																		703	-0.0675	-90	1.31308	0.0505	30	0.376956	0.0415	30	0.77855
																		704	-0.00049995	-30	1.2061	0.00250004	0	0.931205	-0.0185	-30	0.586205
																		705	0.0110001	0	1.30513	-0.00249995	-30	0.447806	0.0425001	30	0.888427
																		706	-0.0159999	-30	1.64482	0.00150004	0	1.0598	0.0330001	30	1.38154
																		707	-0.00199995	-30	0.9843	0.0405	30	0.949295	0.0245001	0	1.42697
																		708	-0.00449995	-30	1.05307	-0.0244999	-30	0.903727	0.0125	0	0.825771
																		709	-0.0314999	-60	1.3304	-0.0244999	-30	0.683766	0.0145001	0	0.9813
																		710	-0.0885	-90	0.91777	-0.0245	-30	0.294283	-0.0104999	-30	0.651329
																		711	-0.0805	-90	1.27926	0.0355	30	0.406296	0.022	0	0.278614
																		712	0.0135	0	1.15312	-0.0764999	-90	0.830678	0.0595	30	0.480694
																		713	0.0255	0	0.702388	-0.0125	-30	0.881234	0.0395001	30	0.629286
																		714	0.00300005	0	0.561582	0.053	30	1.50911	0.0400001	30	0.753152
																		715	-0.023	-30	0.719608	0.0300001	30	1.31524	0.0405	30	1.4122
																		716	-0.0129999	-30	1.40946	0.0230001	0	0.656402	-0.0164999	-30	0.979397
																		717	0.0345	30	0.959952	-0.00049995	-30	0.858156	0.034	30	1.26484
																		718	0.00600005	0	0.844926	-0.00949996	-30	1.04693	0.0235001	0	1.15026
																		719	-0.0855	-90	0.434434	0.0185	0	0.98849	0.0370001	30	0.556781
																		720	-0.0785	-90	0.777782	0.016	0	1.2299	0.0280001	0	0.474875
																		721	-0.0265	-30	0.762705	0.0195001	0	0.605964	0.0105001	0	1.17241
																		722	-0.0209999	-30	1.13458	-0.026	-30	0.905699	0.044	30	1.35212
																		723	-0.00749995	-30	1.48302	-0.0345	-60	1.27338	0.0525	30	1.48335
																		724	-0.0819999	-90	1.0976	-0.0149999	-30	0.824185	0.0155	0	0.614107
																		725	0.00150005	0	1.34701	0.034	30	1.28753	0.0260001	0	1.00923
																		726	0.0220001	0	1.23972	-0.057	-60	0.506838	-0.081	-90	0.509338
																		727	-0.00699995	-30	1.25756	0.0175	0	0.392355	-0.016	-30	0.926974
																		728	0.0435	30	1.20345	-0.00949995	-30	0.456898	0.036	30	1.43704
																		729	0.00200005	0	1.09831	0.0270001	0	0.344153	0.0220001	0	1.2157
																		730	-0.019	-30	0.947112	-0.0355	-60	0.43446	-0.0295	-30	0.63971
																		731	0.0310001	30	0.574725	-0.00849995	-30	0.313137	-0.0705	-90	0.690738
																		732	0.0365	30	0.869174	0.0325001	30	0.347147	-0.011	-30	1.19045
																		733	0.0155	0	1.44614	-0.0195	-30	0.266117	-0.0245	-30	0.821294
																		734	-0.0199999	-30	1.42037	0.00900005	0	0.163242	0.0415	30	1.52583
																		735	-0.0179999	-30	1.61792	-0.00849994	-30	0.891876	-0.0825	-90	0.61538
																		736	-0.0244999	-30	1.206	0.0115	0	0.367367	0.0365	30	1.19209
																		737	0.0155	0	1.33764	0.0155	0	0.806853	-0.00349995	-30	0.86088
																		738	-0.0885	-90	1.28924	-0.0325	-60	1.1486	0.0330001	30	0.219897
																		739	0.00250005	0	1.14263	-0.017	-30	0.948063	-0.024	-30	0.490453
																		740	0.0205	0	1.02108	0.0265	0	0.955864	0.0135	0	0.795328
																		741	0.0305001	30	0.616193	0.036	30	1.16683	-0.08	-90	0.44923
																		742	0.016	0	0.810793	5e-08	0	0.71858	-0.013	-30	0.347002
																		743	-0.0895	-90	0.802644	0.0425	30	0.668047	-0.0135	-30	0.326843
																		744	-0.087	-90	1.02669	0.0155	0	0.694107	0.00250004	0	0.602124
																		745	0.0455001	30	1.12796	-0.043	-60	0.932907	-0.0245	-30	0.826923
																		746	0.0140001	0	1.2762	-0.034	-60	0.644943	0.0125	0	0.163972
																		747	-0.0124999	-30	0.772176	0.0110001	0	0.639584	0.04	30	0.523862
																		748	0.0380001	30	0.820168	0.01	0	0.763455	0.031	30	0.803319
																		749	-0.06	-60	0.707789	-0.077	-90	0.536079	0.0400001	30	2.66398
																		750	-0.0595	-60	0.709826	-0.00749996	-30	0.422594	0.0185	0	0.634081
																		751	-0.00849995	-30	0.991739	0.0175	0	0.222016	-0.026	-30	1.16702
																		752	0.014	0	0.98848	0.0275	0	0.468172	-0.0765	-90	0.933876
																		753	0.0145001	0	0.804984	-0.0165	-30	0.672224	-0.0505	-60	0.38641
																		754	-0.036	-60	0.426281	-0.0204999	-30	1.01102	-0.0775	-90	0.335197
																		755	-0.0164999	-30	1.0707	0.00100005	0	0.176401	-0.012	-30	0.582334
																		756	-0.0435	-60	0.41691	-0.0524999	-60	0.557113	0.0110001	0	0.844898
																		757	-0.0845	-90	0.839625	5e-08	0	1.38592	-0.023	-30	1.51058
																		758	0.028	0	1.03127	-0.0335	-60	1.09733	-0.0325	-60	1.16776
																		759	0.0140001	0	1.07345	-0.0279999	-30	1.12199	-0.04	-60	0.470478
																		760	0.0345	30	0.0954654	-0.022	-30	0.295394	0.0515	30	0.892106
																		761	0.0405001	30	1.15088	0.00950005	0	1.68927	-0.0185	-30	1.32391
																		762	-0.00449995	-30	0.93285	-0.0565	-60	1.19566	0.0325001	30	1.21079
																		763	0.0275	0	1.59408	0.0320001	30	0.55142	-0.0169999	-30	0.915538
																		764	-0.0109999	-30	1.05582	-0.0765	-90	0.590641	0.01	0	1.35006
																		765	-0.0855	-90	1.13153	0.0135	0	0.384962	0.0250001	0	0.441793
																		766	0.0505	30	0.897191	0.00200005	0	0.356424	-0.0404999	-60	0.934965
																		767	0.00400005	0	0.861225	0.016	0	0.503844	-0.00949996	-30	1.21115
																		768	-0.022	-30	1.04879	0.0255	0	1.02181	0.014	0	0.941682
																		769	0.00600005	0	1.04889	-0.0115	-30	0.990833	-0.0345	-60	0.64516
																		770	-0.09	-90	1.00213	0.0375001	30	0.630268	-0.0199999	-30	1.14015
																		771	-0.0194999	-30	0.47488	0.017	0	1.34071	0.052	30	0.88684
																		772	-0.0204999	-30	0.963922	0.0335	30	0.760091	-0.031	-60	0.886483
																		773	-0.0209999	-30	1.10116	0.0235	0	0.558406	-0.0314999	-60	0.322851
																		774	-0.0614999	-90	0.422512	-0.044	-60	0.839161	-0.00449995	-30	0.735042
																		775	-0.051	-60	0.464898	0.0375001	30	1.14964	0.0285	0	1.24637
																		776	-0.036	-60	0.0557302	-0.00199995	-30	0.475862	0.03	30	0.729051
																		777	-0.00899995	-30	0.104126	0.0250001	0	1.20601	0.0130001	0	1.25818
																		778	-0.0255	-30	0.858478	-0.03	-30	1.03301	-0.00449995	-30	0.53149
																		779	-0.00299995	-30	0.912372	0.0130001	0	0.666347	-0.0149999	-30	0.565447
																		780	-0.0855	-90	1.15363	0.0380001	30	0.216324	0.0365	30	0.707261
																		781	-0.00099996	-30	1.23422	0.0230001	0	0.347738	-0.0359999	-60	0.734685
																		782	0.00250005	0	0.914715	0.039	30	0.166604	0.0430001	30	1.2362
																		783	-0.0129999	-30	0.865605	-0.014	-30	0.722424	0.052	30	0.922434
																		784	-0.081	-90	1.18175	-0.00949996	-30	0.793583	0.0350001	30	1.31665
																		785	-0.069	-90	0.933969	0.0385	30	0.611268	0.044	30	0.506429
																		786	-0.034	-60	1.64308	-0.085	-90	1.86341	-0.0894999	-90	0.322494
																		787	-0.056	-60	0.957098	-0.027	-30	0.417936	0.0395001	30	1.49133
																		788	-0.0235	-30	0.828928	-0.0545	-60	0.566428	5e-08	0	0.528581
																		789	-0.0799999	-90	2.03727	0.0550001	30	0.219355	0.0160001	0	1.9244
																		790	0.0180001	0	1.35353	-0.065	-90	0.114743	-0.0165	-30	1.00306
																		791	-0.09	-90	1.43463	0.0410001	30	0.174073	0.0185001	0	0.779709
																		792	-0.00149996	-30	0.90738	-0.0794999	-90	1.99948	-0.0875	-90	0.534572
																		793	-0.00499996	-30	1.20488	-0.033	-60	0.143575	-0.018	-30	0.433076
																		794	0.00800005	0	1.02383	-0.0375	-60	0.954717	-0.0185	-30	1.08332
																		795	-0.0269999	-30	1.45093	-0.0765	-90	0.966768	0.0105001	0	0.707446
																		796	-0.0244999	-30	0.661838	-0.0715	-90	0.895535	-0.0245	-30	0.722148
																		797	-0.00699996	-30	0.693624	-0.0475	-60	1.02639	0.0575	30	2.90822
																		798	0.0495	30	0.993879	0.0225001	0	0.403667	0.0325001	30	2.06277
																		799	-0.0109999	-30	0.98838	-0.014	-30	0.716066	0.0505	30	1.55525
																		800	-0.0844999	-90	0.665303	0.0225001	0	0.404739	0.0205	0	1.40781
																		801	-0.083	-90	0.673045	-0.05	-60	0.541994	-0.00249995	-30	0.81131
																		802	-0.066	-90	0.514411	0.00100005	0	0.335355	0.00150005	0	0.759919
																		803	-0.089	-90	1.11807	-0.0334999	-60	0.821196	0.0385001	30	1.05027
																		804	-0.0129999	-30	0.930099	0.0400001	30	0.529277	0.0120001	0	0.833489
																		805	-0.0715	-90	1.38002	-0.0355	-60	1.20117	0.0160001	0	0.398721
																		806	0.0110001	0	1.16087	-0.076	-90	1.28116	-0.019	-30	0.445864
																		807	-0.0799999	-90	0.758018	-0.0239999	-30	0.568868	0.014	0	1.20096
																		808	-0.0759999	-90	1.05929	0.0375001	30	1.0346	-0.029	-30	1.57312
																		809	0.00950004	0	0.911657	0.0340001	30	1.21303	0.00400005	0	1.72757
																		810	-0.00749995	-30	1.03524	0.0115	0	1.21618	-0.00499996	-30	1.66429
																		811	0.0365	30	1.01436	0.00850004	0	1.52229	0.0475001	30	1.62682
																		812	0.052	30	1.12236	0.00700005	0	0.539701	0.0375001	30	0.640814
																		813	-0.00299995	-30	1.06988	-0.0469999	-60	0.500999	0.00750005	0	1.64345
																		814	0.0240001	0	0.668462	-0.0314999	-60	0.468247	0.015	0	1.41649
																		815	-0.0835	-90	0.526844	0.0215	0	1.25465	0.0375001	30	1.277
																		816	-0.0639999	-90	0.925515	-0.0325	-60	0.557016	0.0355	30	1.01819
																		817	0.00250005	0	0.890775	0.026	0	1.43133	-0.027	-30	0.58779
																		818	-0.0825	-90	0.923679	0.0215001	0	1.18656	-0.011	-30	0.637452
																		819	-0.0164999	-30	0.617011	-0.0104999	-30	1.45386	0.0185	0	0.264861
																		820	-0.0639999	-90	0.669072	0.0245001	0	1.02759	-0.0225	-30	0.683751
																		821	0.0180001	0	0.666729	-0.0199999	-30	0.571826	0.0430001	30	0.889288
																		822	-0.072	-90	0.680687	0.0390001	30	1.34033	-0.0115	-30	0.399732
																		823	-0.09	-90	0.868867	-0.00799994	-30	0.89824	0.024	0	1.24952
																		824	0.0535001	30	0.529492	-0.00249996	-30	1.83723	0.034	30	0.487205
																		825	0.0175	0	0.543754	0.011	0	0.32553	0.0330001	30	1.07566
																		826	0.0325001	30	0.473454	-0.0259999	-30	0.450322	-0.00099995	-30	1.39926
																		827	-0.00649995	-30	0.525212	0.0480001	30	1.40691	0.0195	0	0.471573
																		828	-0.00999995	-30	0.681705	0.0135001	0	1.21706	0.0285001	0	1.26095
																		829	-0.0855	-90	0.360669	-0.0174999	-30	0.761926	-0.00999996	-30	0.822902
																		830	-0.00599995	-30	0.796428	0.0495001	30	0.563975	0.00650004	0	0.902059
																		831	0.0240001	0	0.572385	-0.0265	-30	0.490949	0.0495	30	1.04222
																		832	-0.026	-30	0.47916	0.0340001	30	0.587644	0.0355	30	1.15776
																		833	0.0595	30	0.768407	0.0160001	0	1.13327	-0.018	-30	0.628373
																		834	0.0235001	0	0.722459	-0.0195	-30	1.03468	0.0275001	0	0.726604
																		835	-0.00599995	-30	0.444112	0.0455001	30	0.283128	0.00600004	0	1.10129
																		836	0.0490001	30	0.817414	0.00500005	0	0.967972	0.015	0	0.412921
																		837	0.014	0	1.179	0.0220001	0	0.507947	0.00750005	0	0.238813
																		838	-0.014	-30	0.735195	0.00300006	0	0.472643	0.0175	0	1.07819
																		839	0.0175	0	0.993268	-0.0234999	-30	0.445584	0.034	30	0.978526
																		840	0.0265001	0	1.18583	0.0165001	0	0.731198	0.0465	30	0.996677
																		841	0.0275001	0	1.25185	0.0390001	30	0.631391	0.0335001	30	0.969368
																		842	-0.0659999	-90	1.49382	-0.0269999	-30	0.284881	-0.00149996	-30	1.44296
																		843	-0.0205	-30	1.20243	0.0215001	0	0.71269	-0.013	-30	0.747109
																		844	-0.081	-90	1.25124	-0.00349994	-30	0.798448	-0.00649996	-30	0.47586
																		845	0.00600005	0	1.17961	0.00150006	0	0.73187	0.038	30	1.4164
																		846	0.0105001	0	1.49189	0.0545001	30	0.405575	0.0450001	30	0.84265
																		847	-0.089	-90	0.967898	-0.00199995	-30	0.179028	0.0535	30	0.805761
																		848	-0.0815	-90	0.995918	0.0485001	30	1.01596	-0.00149996	-30	0.581151
																		849	-0.0735	-90	1.1142	0.0250001	0	0.724601	-0.025	-30	1.19213
																		850	-0.0175	-30	1.34681	-0.0119999	-30	0.896115	0.0390001	30	1.26078
																		851	0.00200005	0	1.47752	0.0390001	30	0.932762	0.0455001	30	1.45767
																		852	-0.0545	-60	1.26927	0.0100001	0	0.248475	0.0355	30	0.737108
																		853	-0.089	-90	1.80467	0.0260001	0	0.710734	0.0325	30	0.900883
																		854	-0.026	-30	1.66906	0.021	0	0.250615	-0.0399999	-60	1.16054
																		855	-0.00199995	-30	1.27599	0.0225	0	0.499823	-0.02	-30	0.880213
																		856	-0.0854999	-90	1.07895	0.00050005	0	0.945285	-0.00599996	-30	0.971301
																		857	-0.071	-90	1.80844	0.0390001	30	0.777678	0.0295	0	0.947772
																		858	-0.012	-30	1.25949	0.0130001	0	0.833752	0.0505	30	1.80034
																		859	-0.0415	-60	1.14487	0.0515	30	0.587414	0.0415	30	0.885758
																		860	-0.076	-90	1.57584	-0.0104999	-30	0.746223	0.011	0	0.332506
																		861	-0.081	-90	0.703817	0.00200004	0	0.952615	0.0515	30	0.979283
																		862	-0.0635	-90	1.48292	0.0135	0	0.639515	-0.00749996	-30	0.556108
																		863	-0.08	-90	0.288025	0.00700005	0	1.09194	-0.015	-30	0.551488
																		864	-0.0719999	-90	0.906666	0.0560001	30	0.751477	-0.072	-90	0.907271
																		865	-0.00999995	-30	1.03484	0.0230001	0	1.17415	-0.0199999	-30	1.53691
																		866	-0.0209999	-30	1.02424	0.02	0	0.922136	-0.0305	-60	0.641819
																		867	-0.00849995	-30	1.09699	0.0145001	0	1.05077	0.0245	0	0.871305
																		868	0.00450005	0	0.797039	0.0185	0	0.47197	-0.023	-30	0.589387
																		869	-0.068	-90	0.325928	-0.0209999	-30	0.891655	0.0455001	30	0.973735
																		870	0.0270001	0	0.60733	0.0545001	30	0.551864	-0.0169999	-30	0.697951
																		871	-0.0174999	-30	0.473558	0.0365	30	1.00661	-0.0305	-60	0.927688
																		872	-0.023	-30	0.461536	0.0235001	0	0.664069	-0.014	-30	1.02609
																		873	0.0230001	0	0.727554	-0.019	-30	0.578743	0.0295	0	0.500903
																		874	-0.00349995	-30	0.369125	-0.052	-60	0.536524	0.0380001	30	0.422707
																		875	-0.00899995	-30	0.49852	0.0195	0	0.738676	-0.00999996	-30	0.853571
																		876	-0.0225	-30	0.788682	-0.0459999	-60	0.626402	0.015	0	1.49829
																		877	-0.0765	-90	0.230255	-0.0665	-90	0.781027	0.0555001	30	0.493553
																		878	0.015	0	1.03922	0.012	0	0.818323	0.0390001	30	0.0255185
																		879	-0.0575	-60	0.853279	0.0195001	0	0.57719	0.0220001	0	0.202828
																		880	-0.083	-90	1.00672	0.0500001	30	0.706948	0.036	30	0.123165
																		881	-0.0185	-30	1.42434	0.0180001	0	0.486149	0.0520001	30	0.258021
																		882	-0.027	-30	0.903097	0.049	30	1.07603	0.00750004	0	1.16461
																		883	-0.0705	-90	1.27641	0.011	0	0.713555	0.00200005	0	0.951761
																		884	0.00650005	0	1.16973	-0.0285	-30	0.535102	0.0265001	0	0.906433
																		885	-0.0244999	-30	0.328782	0.00150005	0	0.549602	0.0475	30	0.512158
																		886	0.02	0	1.13774	-0.0364999	-60	0.7278	0.0125001	0	0.426241
																		887	0.0435	30	1.31532	0.0475	30	0.775196	-0.0235	-30	0.235648
																		888	-0.00949995	-30	1.43045	0.0480001	30	0.725857	0.00250005	0	0.305174
																		889	-0.0325	-60	1.63259	0.0265001	0	0.880741	0.0445	30	0.373378
																		890	0.01	0	0.980327	0.042	30	0.588329	-0.00099996	-30	1.23204
																		891	0.0265001	0	1.3682	0.0430001	30	1.36106	-0.027	-30	0.366193
																		892	0.017	0	1.09067	0.0225001	0	1.11009	0.016	0	1.13936
																		893	-0.071	-90	1.1466	0.0220001	0	0.819613	-0.00449996	-30	0.501438
																		894	-0.0284999	-30	1.46683	-0.0109999	-30	1.50831	-0.0235	-30	0.576244
																		895	-0.0355	-60	0.87294	-0.0325	-60	1.13457	0.044	30	1.81601
																		896	0.0230001	0	1.011	-0.00599995	-30	1.02397	-0.00249996	-30	0.915365
																		897	-0.0305	-60	1.65683	0.0520001	30	0.908328	0.014	0	0.945351
																		898	-0.079	-90	1.41568	0.0580001	30	1.10037	-0.0395	-60	0.663871
																		899	0.00050004	0	1.13794	0.0560001	30	1.10672	-0.028	-30	0.454868
																		900	-0.032	-60	1.25287	-0.0474999	-60	0.693351	-0.0335	-60	0.755108
																		901	-0.0715	-90	0.490367	0.0145001	0	0.746837	-0.02	-30	1.3982
																		902	0.0475001	30	0.998666	0.055	30	0.588974	0.0505	30	1.5195
																		903	-0.0859999	-90	1.48139	0.0325	30	0.903146	0.0320001	30	0.707451
																		904	0.00550005	0	1.42638	0.0595	30	0.974887	0.0545001	30	1.31815
																		905	-0.0379999	-60	1.0925	-0.034	-60	0.697234	-0.0365	-60	0.571351
																		906	-0.0615	-90	1.54263	-0.0285	-30	0.681567	0.0295	0	0.782686
																		907	-0.0885	-90	1.3085	0.0415	30	0.642069	-0.0365	-60	0.661152
																		908	-0.0725	-90	1.25898	0.0305001	30	0.818323	0.0190001	0	0.388914
																		909	0.0175	0	1.41935	-0.033	-60	0.411553	0.017	0	0.526102
																		910	-0.0204999	-30	1.57054	-0.0144999	-30	0.38708	-0.0214999	-30	0.397537
																		911	0.0370001	30	1.51043	0.0245	0	1.06994	-0.00099995	-30	1.18384
																		912	-0.0199999	-30	1.35648	0.057	30	0.944198	0.0225	0	0.54828
																		913	-0.00999996	-30	0.91125	0.0385001	30	1.31755	0.012	0	0.824206
																		914	-0.0204999	-30	1.3409	0.0195001	0	0.943158	-0.00649995	-30	0.523694
																		915	-0.0104999	-30	1.15353	0.052	30	1.36119	0.00950006	0	1.04626
																		916	-0.019	-30	1.69199	-0.0435	-60	1.05091	0.0165	0	0.344054
																		917	-0.0875	-90	0.765556	0.052	30	1.65788	-0.0234999	-30	0.452731
																		918	-0.0795	-90	1.12949	-0.0164999	-30	1.49031	-0.0169999	-30	0.698479
																		919	-0.0439999	-60	0.998873	-0.0395	-60	1.19336	0.0585001	30	1.22505
																		920	-0.069	-90	0.150177	-0.0259999	-30	1.2168	-0.042	-60	0.3646
																		921	0.00400005	0	0.170756	-0.0284999	-30	0.892134	0.0110001	0	0.523965
																		922	-0.067	-90	0.17086	0.0105001	0	0.847845	0.023	0	0.506564
																		923	-0.0835	-90	0.524804	0.0325001	30	0.978643	0.00550005	0	0.639206
																		924	0.0375	30	0.953633	0.028	0	0.830234	0.0410001	30	0.602152
																		925	0.0100001	0	0.674267				0.00400005	0	0.875243
																		926	-0.0335	-60	0.57748				0.0140001	0	0.814885
																		927	-0.0735	-90	0.536519				-0.0419999	-60	1.39719
																		928	-0.0795	-90	1.18939				-0.0225	-30	1.32957
																		929	-0.0845	-90	0.597551				5e-08	0	0.312631
																		930	-0.0104999	-30	0.369432				0.0500001	30	0.722676
																		931	-0.032	-60	0.779107				0.01	0	0.256234
																		932	0.0265	0	0.556998				-0.00799995	-30	1.16057
																		933	0.0320001	30	1.0759				-0.089	-90	0.877886
																		934	-0.0675	-90	0.875694				-0.0389999	-60	0.449818
																		935	-0.05	-60	0.784713				0.0585	30	0.550805
																		936	0.0425	30	0.727146				-0.0154999	-30	0.644256
																		937	0.0550001	30	0.741409				-0.0144999	-30	0.993554
																		938	-0.0174999	-30	1.1142				0.0295	0	1.77224
																		939	0.0585	30	0.988069				0.00150005	0	0.855705
																		940	-0.00649995	-30	0.337132				-0.0375	-60	0.929582
																		941	-0.02	-30	0.0981162				-0.0225	-30	0.448536
																		942	-0.018	-30	0.722359				0.0415	30	1.32518
																		943	0.0230001	0	1.31492				0.015	0	0.460227
																		944	-0.0509999	-60	0.643499				-0.0129999	-30	0.569332
																		945	-0.0734999	-90	0.670194				-0.0255	-30	0.362968
																		946	-0.0374999	-60	0.44289				-0.019	-30	1.29469
																		947	0.0290001	0	0.907684				0.0215	0	1.36093
																		948	-0.0144999	-30	0.715532				0.0385	30	0.869406
																		949	0.0330001	30	0.893115				0.00400005	0	1.0315
																		950	-0.00399995	-30	0.732341				-0.0479999	-60	1.32451
																		951	0.00600005	0	0.675896				0.00400005	0	1.79099
																		952	-0.0284999	-30	1.01527				0.0460001	30	0.914628
																		953	-0.0615	-90	0.419253				0.0130001	0	1.49844
																		954	-0.0885	-90	0.379211				0.0345	30	1.02188
																		955	0.00200005	0	0.774724				0.021	0	1.00182
																		956	-0.087	-90	0.809672				0.0315	30	0.735018
																		957	-0.0109999	-30	0.414159				-0.0254999	-30	1.97535
																		958	-0.0659999	-90	0.664692				0.0510001	30	1.31698
																		959	-0.05	-60	0.133672				-0.027	-30	1.06768
																		960	-0.0365	-60	0.206008				0.0415	30	2.35568
																		961	0.0400001	30	0.384205				0.0405	30	1.10004
																		962	0.0460001	30	0.22863				0.0335001	30	0.889118
																		963	0.014	0	0.78512				0.0365	30	1.022
																		964	-0.0415	-60	1.09973				0.00800005	0	1.08971
																		965	-0.0734999	-90	0.567438				0.0555001	30	1.51247
																		966	-0.013	-30	0.558727				0.036	30	0.587992
																		967	0.00100005	0	0.972398				0.058	30	0.537318
																		968	-0.0244999	-30	0.729916				0.016	0	0.669621
																		969	0.00100005	0	0.614567				0.00050004	0	0.863958
																		970	0.051	30	0.942497				0.0395	30	0.641098
																		971	0.0405001	30	0.803188				0.0105	0	1.0947
																		972	-0.0119999	-30	0.740911				0.0175	0	0.820476
																		973	0.0560001	30	0.62625				0.04	30	0.983502
																		974	0.0200001	0	0.743977				0.0565001	30	0.79114
																		975	-0.0795	-90	0.446447				-0.00349995	-30	1.14259
																		976	-0.038	-60	0.615559				-0.067	-90	0.755425
																		977	-0.0345	-60	0.630607				0.0475	30	0.465314
																		978	0.0100001	0	0.314859				0.0190001	0	0.82488
																		979	0.0370001	30	0.715462				0.041	30	0.77421
																		980	-0.0475	-60	1.72133				-0.0175	-30	1.05702
																		981	-0.00149995	-30	0.548134				-0.0499999	-60	0.875782
																		982	0.0235001	0	0.788731				0.028	0	0.347161
																		983	-0.0129999	-30	0.956559				0.0455001	30	0.473661
																		984	-0.028	-30	1.23438				0.042	30	0.970519
																		985	0.00200004	0	1.10399				0.044	30	0.821168
																		986	-0.0385	-60	1.15923				0.0515	30	0.701738
																		987	-0.00599996	-30	0.704074				0.0110001	0	1.36243
																		988	-0.0734999	-90	0.615063				-0.00549996	-30	0.530365
																		989	0.00250005	0	0.727739				0.0495	30	0.743365
																		990	-0.04	-60	1.33003				-0.0279999	-30	0.862218
																		991	-0.0309999	-60	1.77162				0.0410001	30	0.363278
																		992	-0.018	-30	1.31894				-0.00799995	-30	0.972601
																		993	0.00700005	0	1.0119				0.04	30	0.935616
																		994	0.05	30	1.29171				-0.09	-90	0.57512
																		995	0.0345	30	1.40271				-0.0205	-30	1.06919
																		996	-0.024	-30	1.63103				0.0110001	0	0.994866
																		997	-0.0889999	-90	1.45805				-0.00549996	-30	0.921467
																		998	0.00750005	0	0.36872				-0.00449995	-30	0.552045
																		999	-0.044	-60	0.730214				-0.0175	-30	0.823258
																		1000	-0.0135	-30	1.16864				0.019	0	0.683998
																		1001	-0.057	-60	1.56835				0.0205	0	0.631006
																		1002	-0.0445	-60	0.76685				0.0590001	30	0.305298
																		1003	-0.0684999	-90	1.40795				0.0355	30	0.805981
																		1004	-0.032	-60	2.13114				0.059	30	0.936194
																		1005	0.0205	0	2.41223				-0.0309999	-60	1.08055
																		1006	-0.0665	-90	1.23993				0.0355	30	0.733281
																		1007	-0.0815	-90	1.84955				0.0205	0	1.11859
																		1008	0.0225001	0	1.44875				0.028	0	0.725971
																		1009	-0.0584999	-60	1.42261				-0.00849995	-30	0.811312
																		1010	-0.0395	-60	1.13587				-0.0135	-30	1.02861
																		1011	-0.0615	-90	1.2229				0.00600005	0	1.12856
																		1012	-0.071	-90	0.283372				0.0460001	30	1.12636
																		1013	0.0115	0	1.06537				0.0125	0	1.18387
																		1014	0.023	0	0.437138				0.0265001	0	0.32312
																		1015	0.028	0	0.568528				0.0485001	30	0.914979
																		1016	0.0265	0	1.77608				0.015	0	0.20468
																		1017	-0.0185	-30	0.456547				0.0355	30	0.588053
																		1018	0.0125	0	0.952993				-0.0194999	-30	0.936715
																		1019	-0.0724999	-90	0.755761				0.00450005	0	0.680245
																		1020	0.0450001	30	1.08191				0.0375001	30	0.384888
																		1021	0.0135	0	0.58853				0.00950005	0	1.21547
																		1022	-0.0265	-30	0.873089				-0.0355	-60	0.646791
																		1023	-0.0845	-90	0.441002				0.0180001	0	0.136109
																		1024	-0.00949995	-30	0.652393				0.0575	30	0.150414
																		1025	0.0475001	30	0.579916				-0.00199996	-30	0.470576
																		1026	0.0255	0	0.586051				0.0460001	30	0.444884
																		1027	-0.019	-30	0.859229				0.019	0	0.265748
																		1028	0.0405001	30	0.57417				-0.029	-30	1.32419
																		1029	-0.086	-90	1.68727				0.0225001	0	1.04277
																		1030	0.00100005	0	1.60014				0.0525	30	0.371322
																		1031	-0.0705	-90	1.95866				-0.0399999	-60	0.64668
																		1032	0.0250001	0	0.765465				0.0385	30	0.635628
																		1033	0.00550005	0	1.36557				0.0335	30	0.197989
																		1034	0.0175	0	0.640808				0.026	0	0.896311
																		1035	-0.0505	-60	1.11705				-0.0255	-30	1.13722
																		1036	-0.062	-90	1.77776				0.0275	0	0.127902
																		1037	-0.0165	-30	1.45795				0.0415	30	0.176513
																		1038	-0.029	-30	0.680711				0.0415	30	0.71699
																		1039	0.0125001	0	0.731603				0.0335001	30	0.236249
																		1040	-0.00599996	-30	1.11824				0.0540001	30	0.332361
																		1041	0.0340001	30	0.789127				0.00650005	0	0.777652
																		1042	0.0180001	0	0.643578				-0.00949995	-30	0.272882
																		1043	-0.046	-60	0.947053				0.0465001	30	0.196362
																		1044	-0.086	-90	1.02567				0.0515	30	0.3443
																		1045	-0.0279999	-30	1.01626				-0.0304999	-60	0.077924
																		1046	-0.00749995	-30	0.428129				-0.0789999	-90	0.555153
																		1047	-0.0609999	-90	0.403179				-0.0554999	-60	0.503031
																		1048	-0.082	-90	0.535756				-0.013	-30	0.470242
																		1049	0.0225001	0	0.543874				0.016	0	0.258391
																		1050	-0.09	-90	1.20686				-0.0305	-60	0.483513
																		1051	5e-08	0	0.675364				0.0245	0	0.0493495
																		1052	-0.078	-90	0.664271				-0.042	-60	0.924589
																		1053	-0.0615	-90	0.1803				-0.0235	-30	0.980446
																		1054	-0.054	-60	0.329809				0.0445	30	0.111674
																		1055	-0.011	-30	0.56823				0.0115	0	0.893649
																		1056	-0.0795	-90	1.33171				-0.00249995	-30	0.988615
																		1057	-0.083	-90	1.56311				0.018	0	0.590678
																		1058	-0.0625	-90	0.34753				0.0310001	30	0.632522
																		1059	-0.03	-30	0.496349				-0.0634999	-90	0.246452
																		1060	-0.0635	-90	0.713677				-0.0635	-90	0.874575
																		1061	-0.0544999	-60	0.454464				0.0590001	30	0.267892
																		1062	-0.054	-60	0.267234				-0.00499995	-30	0.930579
																		1063	-0.071	-90	0.792394				-0.0149999	-30	0.684682
																		1064	-0.021	-30	1.06329				0.0405	30	0.258649
																		1065	-0.023	-30	0.340208				-0.0304999	-60	0.927103
																		1066	-0.00199995	-30	1.01745				0.0285	0	0.286339
																		1067	-0.019	-30	0.761403				-0.0695	-90	1.0736
																		1068	0.0330001	30	0.582486				-0.0129999	-30	1.32064
																		1069	-0.025	-30	0.846255				-0.0244999	-30	0.676438
																		1070	-0.0104999	-30	0.299214				0.045	30	0.864485
																		1071	-0.074	-90	0.762889				0.0405001	30	0.937935
																		1072	-0.036	-60	0.776058				0.0485	30	0.937233
																		1073	-0.00649995	-30	0.485555				-0.0384999	-60	1.74003
																		1074	-0.0279999	-30	0.949032				0.0170001	0	0.29287
																		1075	-0.0609999	-90	1.20221				0.0580001	30	0.503856
																		1076	-0.059	-60	0.506546				0.00800006	0	0.792425
																		1077	-0.0655	-90	0.771503				0.0590001	30	2.14795
																		1078	-0.054	-60	0.738929				0.016	0	1.26515
																		1079	-0.00599996	-30	0.39595				0.0115	0	0.926586
																		1080	-0.0545	-60	1.21676				0.0545	30	0.461329
																		1081	-0.0555	-60	0.595262				0.0330001	30	0.59486
																		1082	-0.0795	-90	1.57004				0.0175	0	0.437665
																		1083	-0.023	-30	0.571698				0.0450001	30	0.517277
																		1084	-0.0385	-60	0.710115				0.00550005	0	0.146313
																		1085	-0.025	-30	0.763979				0.016	0	0.688013
																		1086	0.0275	0	0.457734				0.0520001	30	2.04644
																		1087	0.041	30	0.841505				0.00900006	0	0.662445
																		1088	-0.00799996	-30	0.802789				-0.00199995	-30	0.713071
																		1089	0.0575	30	0.628034				-0.0759999	-90	0.610172
																		1090	0.0105001	0	0.925269				-0.00199995	-30	1.0772
																		1091	0.00500005	0	1.17666				0.0310001	30	0.84571
																		1092	-0.035	-60	0.876652				0.00400006	0	0.938232
																		1093	0.00850004	0	0.569913				-0.0109999	-30	0.923675
																		1094	-0.0695	-90	0.895761				6e-08	0	0.3578
																		1095	0.0295	0	1.61617				0.0495001	30	0.519678
																		1096	-0.047	-60	0.533774				-0.0159999	-30	1.37146
																		1097	-0.061	-90	1.04141				0.0380001	30	0.768002
																		1098	-0.0555	-60	0.803879				0.0145001	0	0.649153
																		1099	-0.0195	-30	1.09795				-0.0805	-90	0.645739
																		1100	-0.00649996	-30	0.766649				-0.0329999	-60	0.158332
																		1101	-0.0435	-60	1.30904				-0.0379999	-60	1.13504
																		1102	0.0235001	0	0.40971				0.0400001	30	0.587768
																		1103	0.058	30	0.388128				-0.0179999	-30	0.186181
																		1104	-0.0575	-60	0.422882				0.0195001	0	1.24756
																		1105	0.0335001	30	0.752393				-0.00499995	-30	1.09454
																		1106	-0.022	-30	0.582589				-0.032	-60	0.217821
																		1107	-0.0815	-90	0.618132				-0.035	-60	0.268318
																		1108	0.0180001	0	0.830908				0.0250001	0	1.80596
																		1109	-0.016	-30	1.02507				0.0545	30	0.603965
																		1110	-0.088	-90	0.731006				0.00750005	0	0.533784
																		1111	-0.086	-90	1.01933				0.0470001	30	1.1995
																		1112	-0.086	-90	0.790911				0.0180001	0	0.277795
																		1113	-0.00849995	-30	0.243767				0.0335001	30	0.7268
																		1114	-0.014	-30	1.14349				0.0345001	30	0.630048
																		1115	0.0550001	30	1.44657				-0.0294999	-30	1.44224
																		1116	0.0145	0	0.660806				0.0385001	30	0.880235
																		1117	-0.0334999	-60	1.48221				0.0425001	30	1.22381
																		1118	-0.038	-60	1.98638				0.0545001	30	0.575748
																		1119	-0.00649995	-30	1.59538				-0.00349994	-30	0.225692
																		1120	-0.00999995	-30	0.76566				-0.00249994	-30	0.3776
																		1121	0.0320001	30	1.60895				0.0185001	0	0.458594
																		1122	-0.0439999	-60	0.772888				-0.00399995	-30	0.857694
																		1123	-0.052	-60	1.39855				0.0405001	30	0.739566
																		1124	5e-08	0	1.55014				0.0230001	0	0.181347
																		1125	-0.057	-60	1.21022				0.0245001	0	0.719653
																		1126	-0.056	-60	0.782294				0.0515	30	1.10086
																		1127	0.0105	0	1.05864				0.0505	30	1.09878
																		1128	-0.04	-60	0.45229				0.0595001	30	1.07007
																		1129	-0.084	-90	0.459616				0.0190001	0	0.394216
																		1130	-0.068	-90	0.578132				0.00100005	0	0.508375
																		1131	-0.04	-60	0.351888				-0.00799994	-30	0.81225
																		1132	-0.025	-30	0.614174				0.0455001	30	0.70811
																		1133	-0.057	-60	0.627836				-0.00049995	-30	0.51259
																		1134	-0.0365	-60	0.616945				0.053	30	0.913828
																		1135	-0.0745	-90	1.02507				0.0225	0	0.899291
																		1136	-0.053	-60	0.511598				-0.0104999	-30	0.819457
																		1137	0.0490001	30	1.22003				-0.0534999	-60	0.690273
																		1138	-0.0449999	-60	1.14101				0.0505001	30	0.735841
																		1139	-0.0304999	-60	0.713382				0.0585001	30	1.29962
																		1140	-0.015	-30	1.76192				-0.00749995	-30	1.25643
																		1141	-0.082	-90	0.051687				0.0475001	30	0.680378
																		1142	0.024	0	0.595953				0.0495	30	0.815915
																		1143	-0.026	-30	1.23557				0.0320001	30	0.664314
																		1144	-0.017	-30	0.809625				-0.00899995	-30	0.685447
																		1145	-0.086	-90	0.467039				0.0430001	30	1.10367
																		1146	-0.074	-90	1.7144				0.058	30	0.460181
																		1147	-0.0255	-30	1.12626				0.0295	0	0.644769
																		1148	0.00750004	0	1.23448				0.0270001	0	0.33454
																		1149	-0.0575	-60	1.59419				0.0510001	30	0.827277
																		1150	-0.0735	-90	1.00735				0.044	30	0.496953
																		1151	0.012	0	1.68845				-0.0104999	-30	0.473069
																		1152	-0.061	-90	0.789425				0.0215001	0	0.294838
																		1153	-0.0449999	-60	1.67162				0.024	0	0.327821
																		1154	-0.029	-30	1.47439				-0.035	-60	0.413579
																		1155	-0.0685	-90	1.66915				0.0165001	0	0.297402
																		1156	0.00600004	0	1.30439				-0.0299999	-30	0.735106
																		1157	-0.049	-60	0.680117				0.0385001	30	1.21422
																		1158	-0.027	-30	1.71539				0.0505001	30	0.769738
																		1159	-0.0194999	-30	1.19092				0.037	30	1.06861
																		1160	0.0390001	30	1.95153				-0.0249999	-30	0.267534
																		1161	-0.0469999	-60	1.90846				-0.00499996	-30	0.682085
																		1162	-0.0155	-30	0.890713				-0.089	-90	1.01322
																		1163	-0.0389999	-60	1.14468				-0.017	-30	1.04132
																		1164	-0.0185	-30	2.07757				-0.0355	-60	0.729871
																		1165	-0.035	-60	2.06035				-0.0105	-30	0.508033
																		1166	-0.00499995	-30	1.29765				0.02	0	1.1141
																		1167	0.0505	30	2.27649				-0.0749999	-90	0.873357
																		1168	0.0415	30	2.07807				-0.019	-30	1.23829
																		1169	0.045	30	1.23924				0.0360001	30	0.761468
																		1170	-0.0199999	-30	1.09537				0.014	0	0.80019
																		1171	-0.0715	-90	1.40548				0.0120001	0	0.902883
																		1172	-0.0485	-60	2.29481				0.00900005	0	0.778434
																		1173	0.029	0	1.28033				-0.0214999	-30	0.608528
																		1174	0.0195	0	2.43956				0.042	30	0.748521
																		1175	0.014	0	1.64529				-0.0209999	-30	0.590527
																		1176	0.0270001	0	1.97579				0.0365001	30	1.45405
																		1177	0.00500005	0	1.14652				0.0495001	30	0.69426
																		1178	0.0445001	30	1.1847				0.0310001	30	0.728577
																		1179	0.0575	30	1.34827				0.0160001	0	0.941092
																		1180	0.0175	0	1.10542				0.0595	30	0.720158
																		1181	-0.00849995	-30	1.10724				0.0310001	30	1.03757
																		1182	-0.00499995	-30	0.981422				0.0560001	30	1.19919
																		1183	0.0335001	30	1.9372				0.0175	0	1.08613
																		1184	0.0345	30	0.985179				-0.0104999	-30	1.25759
																		1185	0.0445	30	1.15154				0.0235001	0	1.08898
																		1186	0.0145	0	0.558842				0.00450005	0	0.757585
																		1187	-0.00149995	-30	0.784413				-0.00399996	-30	1.19413
																		1188	-0.0104999	-30	0.792078				-0.0164999	-30	0.765873
																		1189	0.00800006	0	0.655118				0.0475001	30	0.960251
																		1190	0.0415001	30	0.813116				-0.00749995	-30	0.648671
																		1191	0.0415001	30	0.697057				0.0470001	30	0.795399
																		1192	0.00950005	0	0.843905				0.0425	30	0.803428
																		1193	-0.00149994	-30	1.85222				0.0295	0	0.791512
																		1194	-0.0185	-30	1.47353				-0.0185	-30	1.34604
																		1195	0.0515001	30	1.57412				-0.0164999	-30	1.16344
																		1196	0.00400005	0	1.22079				-0.0249999	-30	1.36326
																		1197	-0.0104999	-30	1.04802				0.0110001	0	1.14648
																		1198	-0.0785	-90	0.941154				0.0460001	30	2.05364
																		1199	-0.00549995	-30	1.48258				-0.0465	-60	1.16616
																		1200	-0.088	-90	1.66412
																		1201	-0.03	-30	1.55461
																		1202	0.0330001	30	2.28539
																		1203	0.042	30	1.79356
																		1204	-0.0149999	-30	1.98179
																		1205	0.0455001	30	1.51616
																		1206	-0.0779999	-90	1.72431
																		1207	-0.016	-30	1.12214
																		1208	0.0105	0	1.34256
																		1209	-0.0199999	-30	1.02378
																		1210	-0.0114999	-30	1.04871
																		1211	-0.0204999	-30	1.39564
																		1212	0.00650004	0	0.868006
																		1213	0.0380001	30	0.913707
																		1214	-0.0249999	-30	1.30898
																		1215	-0.00199996	-30	1.76235
																		1216	-0.0275	-30	1.1769
																		1217	-0.00099996	-30	0.827187
																		1218	-0.00399996	-30	0.9608
																		1219	-0.00749995	-30	1.27011
																		1220	-0.00649996	-30	1.26244
																		1221	-0.0174999	-30	1.05387
																		1222	0.0405001	30	0.856447
																		1223	-0.0185	-30	0.790124
																		1224	-0.00899995	-30	1.37572
																		1225	0.0105001	0	1.02671
																		1226	-0.00099995	-30	1.24461
																		1227	-0.0345	-60	1.61634
																		1228	0.00950005	0	1.17188
																		1229	-0.0105	-30	1.44705
																		1230	0.0365	30	1.30814
																		1231	0.0165	0	1.22872
																		1232	-0.083	-90	0.822169
																		1233	-0.0169999	-30	1.17174
																		1234	-0.00449995	-30	1.07853
																		1235	0.0215	0	0.4053
																		1236	-0.014	-30	0.792078
																		1237	0.045	30	0.540726
																		1238	-0.0145	-30	0.579601
																		1239	-0.027	-30	1.01667
																		1240	-0.0485	-60	0.741219
																		1241	-0.0245	-30	1.05735
																		1242	-0.0194999	-30	1.15168
																		1243	-0.00049996	-30	0.682981
																		1244	-0.0209999	-30	0.797789
																		1245	0.0250001	0	1.01556
																		1246	0.0225	0	1.15112
																		1247	-0.0124999	-30	1.12312
																		1248	-0.00549995	-30	1.511
																		1249	0.0145	0	1.00887
																		1250	-0.029	-30	1.28752
																		1251	0.022	0	0.779117
																		1252	0.0460001	30	0.854634
																		1253	-0.0234999	-30	1.2584
																		1254	0.0320001	30	1.4327
																		1255	0.024	0	1.48565
																		1256	0.03	30	1.16589
																		1257	0.0260001	0	0.985184
																		1258	-0.0194999	-30	1.50125
																		1259	-0.00199996	-30	1.25771
																		1260	0.0185	0	1.13845
																		1261	0.0535001	30	0.897408
																		1262	-0.072	-90	0.957595
																		1263	0.0125	0	0.745122
																		1264	0.019	0	0.693569
																		1265	0.00900005	0	0.642855
																		1266	0.0415	30	0.803638
																		1267	0.0335001	30	1.00455
																		1268	-0.00799995	-30	0.863829
																		1269	-0.018	-30	0.915798
																		1270	0.00700005	0	0.80824
																		1271	-0.0775	-90	1.53385
																		1272	0.0275001	0	1.27958
																		1273	-0.00749995	-30	1.19612
																		1274	-0.00949995	-30	2.04463
																		1275	0.00100004	0	1.12172
																		1276	0.0545001	30	1.06641
																		1277	0.012	0	0.344141
																		1278	-0.00049995	-30	0.658739
																		1279	0.0505	30	0.702485
																		1280	-0.0124999	-30	1.02935
																		1281	-0.00749996	-30	0.485977
																		1282	0.0190001	0	0.592695
																		1283	-0.0309999	-60	0.772154
																		1284	-0.0295	-30	1.39076
																		1285	0.00900005	0	0.810742
																		1286	-0.047	-60	0.821334
																		1287	0.0350001	30	0.995913
																		1288	-0.0395	-60	0.769506
																		1289	-0.00899995	-30	0.684378
																		1290	0.01	0	0.532649
																		1291	0.00200005	0	1.01709
																		1292	0.00850005	0	2.17699
																		1293	-0.0139999	-30	0.456853
																		1294	-0.0209999	-30	0.676293
																		1295	-0.00499996	-30	0.495865
																		1296	-0.00899995	-30	0.867591
																		1297	0.00200004	0	0.83666
																		1298	0.052	30	0.888907
																		1299	-0.0249999	-30	1.02308
																		1300	-0.0879999	-90	0.496701
																		1301	-0.0144999	-30	1.05652
																		1302	-0.085	-90	1.17676
																		1303	0.0115	0	0.596735
																		1304	0.0180001	0	0.431912
																		1305	0.0165001	0	1.46321
																		1306	-0.0115	-30	1.30675
																		1307	-0.0125	-30	1.404
																		1308	-0.00949996	-30	1.09901
																		1309	-0.00499996	-30	0.640486
																		1310	-0.0154999	-30	0.890441
																		1311	-0.00249995	-30	0.808797
																		1312	-0.0845	-90	0.991452
																		1313	-0.00249995	-30	1.2226
																		1314	0.0510001	30	0.83666
																		1315	0.0305001	30	0.953833
																		1316	0.0145001	0	0.819106
																		1317	-0.00349995	-30	0.654981
																		1318	-0.0205	-30	1.04412
																		1319	0.0275001	0	0.703047
																		1320	0.015	0	0.799182
																		1321	0.0245	0	1.49303
																		1322	-0.0114999	-30	1.20755
																		1323	-0.0725	-90	0.659296
																		1324	-0.087	-90	1.15015
																		1325	-0.0325	-60	0.891277
																		1326	0.00900005	0	1.28877
																		1327	-0.00149995	-30	1.51017
																		1328	-0.0259999	-30	1.49066
																		1329	-0.023	-30	1.50794
																		1330	0.0515	30	1.12214
																		1331	0.0165	0	0.734672
																		1332	0.0165	0	0.504923
																		1333	0.00200005	0	1.03924
																		1334	-0.0295	-30	0.91315
																		1335	0.0295	0	0.983093
																		1336	-0.0785	-90	0.986156
																		1337	-0.00299996	-30	0.90075
																		1338	-0.0215	-30	0.699563
																		1339	0.0105	0	0.993822
																		1340	0.0235001	0	1.22734
																		1341	0.00450004	0	0.920952
																		1342	-0.0335	-60	0.844047
																		1343	-0.0169999	-30	0.513141
																		1344	-0.03	-30	0.785527
																		1345	0.0295	0	1.2003
																		1346	-0.00899996	-30	0.813394
																		1347	-0.0255	-30	0.928061
																		1348	0.0525	30	1.08871
																		1349	0.0245	0	0.991174
																		1350	-0.0339999	-60	0.580715
																		1351	0.0195001	0	0.966794
																		1352	-0.00999995	-30	1.39439
																		1353	0.0175	0	1.11406
																		1354	-0.0895	-90	0.643691
																		1355	-0.023	-30	1.34716
																		1356	0.0245	0	0.726312
																		1357	0.0125001	0	0.987827
																		1358	0.043	30	0.810463
																		1359	0.0395001	30	0.882724
																		1360	0.00800005	0	0.584703
																		1361	0.0175	0	0.483657
																		1362	0.0560001	30	0.624186
																		1363	0.00250005	0	0.451881
																		1364	-0.00299995	-30	0.832418
																		1365	0.0285	0	0.5292
																		1366	-0.018	-30	1.0048
																		1367	0.0215	0	0.567643
																		1368	-0.0305	-60	0.378545
																		1369	-0.028	-30	1.17555
																		1370	0.0445	30	0.540804
																		1371	0.0585	30	0.785057
																		1372	-0.0129999	-30	0.287804
																		1373	-0.027	-30	0.693104
																		1374	0.0385	30	0.78921
																		1375	-0.0119999	-30	0.730163
																		1376	-0.011	-30	0.19317
																		1377	0.055	30	0.865582
																		1378	-0.081	-90	0.895798
																		1379	0.0475001	30	0.882636
																		1380	0.0480001	30	0.538466
																		1381	0.00750005	0	0.74947
																		1382	0.052	30	0.531625
																		1383	-0.0109999	-30	0.425994
																		1384	0.00350005	0	0.370491
																		1385	-0.011	-30	0.416901
																		1386	0.0260001	0	0.519936
																		1387	-0.00899995	-30	0.799688
																		1388	-0.00149995	-30	0.834148
																		1389	0.041	30	0.354387
																		1390	-0.0199999	-30	0.375773
																		1391	-0.0369999	-60	0.927574
																		1392	0.0130001	0	0.634748
																		1393	0.00850005	0	1.01615
																		1394	0.0540001	30	0.436988
																		1395	0.0135	0	0.619161
																		1396	-0.032	-60	0.44028
																		1397	-0.0154999	-30	0.308844
																		1398	-0.0124999	-30	0.847137
																		1399	-0.0105	-30	0.670159
																		1400	0.00300005	0	0.431967
																		1401	-0.0199999	-30	0.68098
																		1402	0.028	0	0.903245
																		1403	0.00750004	0	0.555784
																		1404	0.0575	30	1.29218
																		1405	0.059	30	0.772414
																		1406	0.0330001	30	0.564528
																		1407	0.00900004	0	0.632669
																		1408	0.0320001	30	0.527991
																		1409	0.0125	0	0.549633
																		1410	-0.0124999	-30	0.508769
																		1411	-0.0275	-30	0.580025
																		1412	0.0380001	30	0.731462
																		1413	-0.00949995	-30	0.617862
																		1414	-0.00899996	-30	0.562276
																		1415	-0.0135	-30	0.198103
																		1416	-0.0165	-30	0.339236
																		1417	-0.0135	-30	0.498033
																		1418	0.0400001	30	0.437249
																		1419	-0.0765	-90	0.750338
																		1420	0.0555001	30	0.519502
																		1421	-0.0175	-30	0.180008
																		1422	-0.09	-90	0.354994
																		1423	-0.0225	-30	0.688082
																		1424	-0.0305	-60	0.532406
																		1425	-0.029	-30	0.382702
																		1426	-0.0164999	-30	0.526345
																		1427	-0.0155	-30	0.337418
																		1428	0.0205	0	0.141998
																		1429	0.00650005	0	0.258887
																		1430	-0.0295	-30	0.706611
																		1431	-0.00399995	-30	0.815968
																		1432	-0.00749995	-30	0.672409
																		1433	-0.0185	-30	0.571281
																		1434	0.026	0	0.216718
																		1435	0.0215	0	0.302784
																		1436	0.0495	30	0.148146
																		1437	-0.0549999	-60	0.503747
																		1438	0.0135	0	0.198103
																		1439	-0.0419999	-60	0.572926
																		1440	-0.0259999	-30	0.912682
																		1441	0.0315001	30	0.805232
																		1442	-0.0455	-60	0.727652
																		1443	0.0225	0	1.66925
																		1444	0.00650005	0	1.15936
																		1445	-0.00049995	-30	1.11936
																		1446	-0.0334999	-60	1.24517
																		1447	0.02	0	1.6154
																		1448	-0.0375	-60	1.32984
																		1449	-0.029	-30	1.161
																		1450	-0.0234999	-30	1.434
																		1451	0.00350005	0	1.55158
																		1452	-0.00649996	-30	1.06204
																		1453	-0.00199995	-30	1.12403
																		1454	-0.00449995	-30	1.7819
																		1455	0.0370001	30	1.75021
																		1456	0.0155	0	1.54301
																		1457	0.0185001	0	1.72527
																		1458	0.0470001	30	1.55955
																		1459	0.0215	0	1.01719
																		1460	0.0590001	30	1.25313
																		1461	-0.0445	-60	1.25893
																		1462	0.0445	30	1.39539
																		1463	0.0105001	0	0.85865
																		1464	0.00950005	0	1.26681
																		1465	0.0535001	30	0.699686
																		1466	0.0500001	30	0.75025
																		1467	0.0575	30	1.66241
																		1468	0.014	0	1.76293
																		1469	0.044	30	1.28828
																		1470	0.017	0	0.796746
																		1471	0.0320001	30	1.13356
																		1472	0.0295	0	1.11667
																		1473	0.00150005	0	1.40127
																		1474	0.019	0	1.3114
																		1475	-0.026	-30	1.35123
																		1476	-0.0124999	-30	1.79229
																		1477	-0.0209999	-30	1.92182
																		1478	0.0165	0	1.16585
																		1479	0.0280001	0	1.16256
																		1480	-0.0315	-60	1.3624
																		1481	-0.0129999	-30	1.13304
																		1482	-0.022	-30	1.36586
																		1483	0.0540001	30	1.25529
																		1484	0.0585	30	1.23771
																		1485	-0.0234999	-30	0.537601
																		1486	0.0545	30	0.326943
																		1487	0.00300005	0	0.579418
																		1488	0.00450005	0	1.83272
																		1489	0.0420001	30	1.9032
																		1490	0.026	0	1.48604
																		1491	0.0185001	0	1.37764
																		1492	-0.02	-30	1.97922
																		1493	-0.021	-30	1.40811
																		1494	-0.00449995	-30	1.34196
																		1495	-0.0224999	-30	1.58371
																		1496	0.0425	30	1.35495
																		1497	-0.00799995	-30	1.54059
																		1498	0.00700005	0	1.76917
																		1499	-0.0309999	-60	1.47106
																		1500	-0.035	-60	1.68458
																		1501	-0.0264999	-30	1.40231
																		1502	0.0310001	30	0.65847
																		1503	0.0295	0	1.40456
																		1504	-0.00149995	-30	1.57392
																		1505	-0.014	-30	1.50362
																		1506	-0.0255	-30	0.0383559
																		1507	-0.0335	-60	0.977965
																		1508	-0.026	-30	2.02961
																		1509	0.0425	30	1.78614
																		1510	-0.00199995	-30	1.5018
																		1511	-0.00149995	-30	1.83376
																		1512	-0.0174999	-30	1.71679
																		1513	0.0400001	30	1.60735
																		1514	-0.0369999	-60	2.00927
																		1515	-0.00949995	-30	1.92969
																		1516	-0.0214999	-30	1.91004
																		1517	0.0180001	0	1.5831
																		1518	-0.0769999	-90	1.6354
																		1519	-0.00549995	-30	1.34854
																		1520	0.031	30	1.45591
																		1521	0.00850004	0	1.38552
																		1522	0.0450001	30	1.19772
																		1523	-0.034	-60	1.91125
																		1524	-0.0324999	-60	1.98165
																		1525	-0.035	-60	1.55981
																		1526	0.0275001	0	1.80415
																		1527	-0.0194999	-30	1.23174
																		1528	0.0360001	30	0.966364
																		1529	0.0495	30	0.907314
																		1530	-0.0235	-30	1.85437
																		1531	-0.041	-60	1.10524
																		1532	-0.0249999	-30	1.01849
																		1533	-0.0234999	-30	0.692496
																		1534	0.0190001	0	0.898221
																		1535	-0.034	-60	1.34776
																		1536	0.00700005	0	1.44223
																		1537	-0.0734999	-90	1.56526
																		1538	0.0510001	30	1.33703
																		1539	0.0190001	0	1.34127
																		1540	0.0395	30	0.970345
																		1541	0.0540001	30	0.591195
																		1542	-0.0129999	-30	1.35582
																		1543	0.0315	30	1.15858
																		1544	-0.022	-30	1.0952
																		1545	0.0135	0	1.02697
																		1546	0.0545001	30	1.20706
																		1547	0.00600005	0	0.720812
																		1548	0.012	0	0.760294
																		1549	0.0295	0	0.726267
																		1550	0.00600005	0	0.364864
																		1551	0.0375	30	0.605134
																		1552	0.0510001	30	1.00507
																		1553	-0.0315	-60	0.56271
																		1554	0.0165001	0	0.289883
																		1555	-0.0125	-30	0.510412
																		1556	-0.0249999	-30	1.16784
																		1557	0.0115	0	0.956752
																		1558	-0.0115	-30	0.264686
																		1559	-0.0304999	-60	1.06818
																		1560	0.012	0	0.608947
																		1561	-0.082	-90	1.24378
																		1562	-0.0225	-30	1.05364
																		1563	0.0155	0	1.66942
																		1564	0.016	0	0.851467
																		1565	-0.0305	-60	0.9429
																		1566	0.0145001	0	0.667995
																		1567	-0.0379999	-60	0.991558
																		1568	0.0120001	0	0.637086
																		1569	-0.0409999	-60	0.620287
																		1570	-0.035	-60	0.88454
																		1571	0.00950005	0	0.525565
																		1572	-0.0219999	-30	1.11659
																		1573	0.0130001	0	0.815273
																		1574	0.014	0	1.11027
																		1575	-0.032	-60	1.35408
																		1576	-0.0164999	-30	0.766615
																		1577	-0.0335	-60	0.607211
																		1578	0.01	0	0.908006
																		1579	0.0180001	0	0.525131
																		1580	-0.0215	-30	1.11494
																		1581	0.0555	30	0.806094
																		1582	0.0160001	0	0.731894
																		1583	0.00150005	0	0.918396
																		1584	0.00700005	0	1.17659
																		1585	-0.00399995	-30	1.5418
																		1586	0.02	0	0.642451
																		1587	-0.029	-30	0.636998
																		1588	0.0130001	0	0.488855
																		1589	-0.0325	-60	1.00143
																		1590	-0.0315	-60	0.91675
																		1591	0.0105001	0	0.617084
																		1592	0.0325	30	0.652671
																		1593	-0.029	-30	0.407638
																		1594	-0.00749995	-30	0.991904
																		1595	0.0105	0	1.39322
																		1596	-0.0319999	-60	1.14577
																		1597	-0.00049995	-30	1.20066
																		1598	0.023	0	1.20378
																		1599	0.0265	0	0.638729
																		1600	-0.00049995	-30	1.32638
																		1601	-0.035	-60	1.39409
																		1602	-0.0159999	-30	1.08109
																		1603	-0.0169999	-30	0.9487
																		1604	0.0350001	30	0.822374
																		1605	0.0550001	30	1.13503
																		1606	-0.0295	-30	1.9376
																		1607	-0.00099995	-30	1.32643
																		1608	-0.0275	-30	1.0872
																		1609	-0.0215	-30	1.15464
																		1610	-0.0289999	-30	0.981275
																		1611	-0.0144999	-30	1.66502
																		1612	0.00600005	0	1.25101
																		1613	0.0575	30	1.17787
																		1614	-0.0209999	-30	1.12056
																		1615	-0.038	-60	1.17973
																		1616	-0.0295	-30	1.57948
																		1617	0.036	30	1.10018
																		1618	-0.049	-60	1.44134
																		1619	-0.0185	-30	1.31702
																		1620	0.00150004	0	1.36121
																		1621	-0.00899996	-30	1.07067
																		1622	0.0115	0	1.13511
																		1623	-0.0225	-30	1.13668
																		1624	-0.0215	-30	0.908281
																		1625	-0.0215	-30	1.09305
																		1626	0.0320001	30	0.608899
																		1627	-0.0279999	-30	0.559286
																		1628	-0.031	-60	0.559142
																		1629	-0.0129999	-30	0.958323
																		1630	0.00350005	0	1.36734
																		1631	-0.00799995	-30	1.1428
																		1632	0.0455001	30	0.724515
																		1633	-0.00999996	-30	1.02419
																		1634	0.045	30	0.748752
																		1635	-0.0165	-30	0.603905
																		1636	-0.0379999	-60	0.780261
																		1637	-0.0535	-60	1.62054
																		1638	0.00450005	0	1.03075
																		1639	0.026	0	0.690726
																		1640	-0.03	-30	0.821745
																		1641	0.0245	0	0.935942
																		1642	0.059	30	0.881625
																		1643	0.0395	30	1.07266
																		1644	0.0130001	0	0.931663
																		1645	0.014	0	0.792949
																		1646	0.0265001	0	0.764149
																		1647	-0.0255	-30	1.25885
																		1648	0.0485001	30	0.764154
																		1649	0.0330001	30	1.01763
																		1650	0.0195001	0	1.12298
																		1651	-0.00949995	-30	0.47118
																		1652	0.0435	30	0.81989
																		1653	0.0235	0	0.689591
																		1654	-0.022	-30	0.944781
																		1655	0.00450005	0	0.475595
																		1656	-0.0794999	-90	0.590647
																		1657	0.00750005	0	0.679608
																		1658	-0.0185	-30	0.742338
																		1659	0.00800005	0	0.266458
																		1660	-0.0275	-30	0.546738
																		1661	0.058	30	0.216126
																		1662	0.0595	30	0.559711
																		1663	-0.032	-60	0.489572
																		1664	0.0190001	0	0.489428
																		1665	-0.0385	-60	0.848836
																		1666	-0.0295	-30	0.606044
																		1667	-0.018	-30	0.646108
																		1668	0.057	30	0.283705
																		1669	-0.0859999	-90	0.775697
																		1670	0.0105001	0	0.803498
																		1671	-0.00949995	-30	0.937082
																		1672	-0.0485	-60	0.650097
																		1673	0.059	30	0.372666
																		1674	-0.034	-60	0.398472
																		1675	0.0280001	0	0.420998
																		1676	0.0105	0	0.529057
																		1677	-0.04	-60	0.291119
																		1678	-0.012	-30	1.3548
																		1679	0.053	30	0.938936
																		1680	0.00500005	0	0.814051
																		1681	-0.00599996	-30	0.871647
																		1682	-0.0225	-30	1.01051
																		1683	-0.049	-60	1.03731
																		1684	-0.0345	-60	1.08093
																		1685	0.0235001	0	1.04971
																		1686	0.05	30	1.46229
																		1687	0.031	30	0.959183
																		1688	-0.00899996	-30	1.70765
																		1689	-0.0235	-30	1.4851
																		1690	0.0400001	30	0.960748
																		1691	-0.0335	-60	2.67011
																		1692	-0.00849996	-30	1.74756
																		1693	0.0515	30	0.91798
																		1694	0.042	30	2.40493
																		1695	0.0330001	30	1.17231
																		1696	4e-08	0	1.13211
																		1697	-0.00649995	-30	2.39695
																		1698	0.0425	30	1.17901
																		1699	-0.036	-60	1.92976
																		1700	-0.0375	-60	1.47427
																		1701	0.034	30	1.43592
																		1702	-0.0305	-60	2.30343
																		1703	-0.044	-60	1.0068
																		1704	0.0555001	30	1.20411
																		1705	-0.0455	-60	1.00337
																		1706	0.03	30	0.984984
																		1707	-0.018	-30	1.55938
																		1708	0.00700005	0	1.60457
																		1709	-0.0255	-30	1.886
																		1710	-0.053	-60	0.927813
																		1711	-0.043	-60	1.97168
																		1712	0.0390001	30	1.57478
																		1713	0.016	0	0.957184
																		1714	0.0240001	0	1.34895
																		1715	0.016	0	1.20624
																		1716	-0.0145	-30	1.26741
																		1717	0.0280001	0	1.40356
																		1718	0.0415	30	1.28665
																		1719	-0.027	-30	1.33869
																		1720	-0.0845	-90	1.01977
																		1721	-0.031	-60	1.23034
																		1722	-0.033	-60	1.02048
																		1723	-0.00049996	-30	1.19883
																		1724	-0.00949996	-30	1.46785
																		1725	-0.0315	-60	1.24345
																		1726	-0.023	-30	0.993823
																		1727	-0.023	-30	1.69339
																		1728	0.0390001	30	1.31688
																		1729	0.0435	30	0.852395
																		1730	-0.0209999	-30	1.14237
																		1731	0.0265001	0	0.868367
																		1732	-0.0115	-30	0.722376
																		1733	0.00800005	0	1.19727
																		1734	-0.023	-30	0.875211
																		1735	0.00150005	0	1.16718
																		1736	0.0205	0	1.23077
																		1737	-0.0365	-60	0.951339
																		1738	-0.0165	-30	1.12142
																		1739	-0.0375	-60	1.2483
																		1740	0.0305001	30	0.838002
																		1741	-0.031	-60	0.852685
																		1742	-0.0245	-30	1.11243
																		1743	0.0395	30	1.3374
																		1744	-0.015	-30	0.817326
																		1745	-0.0205	-30	1.27197
																		1746	0.021	0	1.116
																		1747	-0.00849996	-30	1.18244
																		1748	0.0175	0	1.3374
																		1749	0.0485001	30	1.10602
																		1750	0.013	0	0.72979
																		1751	0.0270001	0	0.645818
																		1752	-0.00949996	-30	0.72509
																		1753	-0.0325	-60	0.783681
																		1754	-0.09	-90	0.809202
																		1755	-0.034	-60	0.521928
																		1756	-0.0345	-60	1.11514
																		1757	-0.00549996	-30	0.740483
																		1758	0.0175	0	0.789665
																		1759	0.0265001	0	0.652662
																		1760	-0.0365	-60	0.599775
																		1761	0.01	0	0.66222
																		1762	-0.0105	-30	1.04457
																		1763	-0.00749996	-30	0.372381
																		1764	-0.00099995	-30	0.874497
																		1765	0.0535001	30	0.842557
																		1766	0.031	30	0.857674
																		1767	0.0265001	0	0.723661
																		1768	-0.031	-60	1.1612
																		1769	-0.0175	-30	1.17146
																		1770	-0.039	-60	0.808632
																		1771	-0.00749996	-30	0.983984
																		1772	-0.07	-90	0.859529
																		1773	-0.022	-30	1.08949
																		1774	-0.00999996	-30	1.40298
																		1775	0.00400004	0	0.723376
																		1776	-0.014	-30	0.639974
																		1777	-0.021	-30	0.728225
																		1778	-0.0105	-30	0.637694
																		1779	0.0565001	30	0.88576
																		1780	-0.076	-90	1.12342
																		1781	-0.00199995	-30	1.29891
																		1782	0.0180001	0	0.386209
																		1783	-0.00749996	-30	0.638264
																		1784	-0.024	-30	0.698714
																		1785	0.0185001	0	0.890604
																		1786	0.00700004	0	0.349995
																		1787	-0.0645	-90	0.581808
																		1788	0.0165	0	0.624147
																		1789	-0.00249995	-30	0.862379
																		1790	-0.0395	-60	0.678613
																		1791	-0.038	-60	0.649957
																		1792	-0.00199996	-30	1.26997
																		1793	-0.0195	-30	1.04173
																		1794	-0.087	-90	0.987124
																		1795	0.014	0	0.546738
																		1796	0.0115	0	1.17032
																		1797	-0.0385	-60	0.433826
																		1798	-0.044	-60	0.508815
																		1799	-0.033	-60	0.886045
																		1800	-0.016	-30	0.733354
																		1801	-0.036	-60	1.14194
																		1802	0.016	0	1.85934
																		1803	-0.083	-90	1.14052
																		1804	0.017	0	1.78934
																		1805	-0.0865	-90	1.62781
																		1806	-0.086	-90	1.08107
																		1807	0.0115	0	0.521932
																		1808	-0.011	-30	0.860379
																		1809	-0.0225	-30	2.0116
																		1810	-0.0225	-30	1.10887
																		1811	0.0145	0	1.03831
																		1812	-0.039	-60	0.563136
																		1813	-0.0415	-60	0.679752
																		1814	0.0220001	0	0.933232
																		1815	-0.023	-30	1.16633
																		1816	0.00200005	0	1.23647
																		1817	-0.00899995	-30	1.21694
																		1818	-0.00449995	-30	1.43178
																		1819	-0.0185	-30	1.56836
																		1820	0.0350001	30	1.23205
																		1821	0.059	30	0.936942
																		1822	0.0285	0	1.0058
																		1823	-0.0825	-90	1.19185
																		1824	-0.0835	-90	0.574539
																		1825	0.00100004	0	1.28337
																		1826	-0.018	-30	1.05883
																		1827	-0.0205	-30	1.08207
																		1828	0.00550004	0	1.34967
																		1829	-0.038	-60	1.73431
																		1830	-0.0175	-30	0.643678
																		1831	-0.03	-30	1.49594
																		1832	0.00200004	0	1.73302
																		1833	0.0245	0	1.09391
																		1834	-0.00949996	-30	1.1535
																		1835	0.00900004	0	1.1813
																		1836	-0.039	-60	1.26698
																		1837	-0.00349995	-30	1.39728
																		1838	-0.087	-90	1.44105
																		1839	0.0205	0	1.12427
																		1840	-0.011	-30	1.99021
																		1841	0.04	30	1.20482
																		1842	-0.00449996	-30	0.927533
																		1843	0.00250004	0	1.10061
																		1844	-0.0144999	-30	1.2051
																		1845	-0.024	-30	1.48069
																		1846	0.01	0	1.03431
																		1847	0.0290001	0	0.81847
																		1848	0.0560001	30	1.1073
																		1849	0.0415	30	0.94806
																		1850	0.00950005	0	1.65376
																		1851	0.0555001	30	1.2838
																		1852	-0.021	-30	1.82455
																		1853	-0.0195	-30	1.40612
																		1854	-0.031	-60	1.87416
																		1855	0.0240001	0	1.55596
																		1856	-0.00949996	-30	1.39728
																		1857	-0.0125	-30	1.51048
																		1858	-0.0285	-30	1.38046
																		1859	-0.02	-30	1.22179
																		1860	-0.00799996	-30	1.51576
																		1861	-0.034	-60	0.857674
																		1862	-0.029	-30	1.51804
																		1863	-0.00199995	-30	1.11415
																		1864	-0.024	-30	1.05291
																		1865	-0.00599995	-30	0.49591
																		1866	0.00450006	0	0.537755
																		1867	-0.0599999	-60	0.392855
																		1868	0.0185001	0	0.152732
																		1869	-0.00649994	-30	0.587884
																		1870	0.0175	0	0.22692
																		1871	0.0500001	30	0.59415
																		1872	0.017	0	0.476327
																		1873	0.0400001	30	0.459432
																		1874	0.0190001	0	0.967312
																		1875	0.0330001	30	0.274922
																		1876	-0.0129999	-30	0.651886
																		1877	0.00500005	0	1.20788
																		1878	0.0120001	0	0.78739
																		1879	0.057	30	0.668675
																		1880	0.00050004	0	0.677174
																		1881	-0.0265	-30	0.412214
																		1882	0.028	0	0.862245
																		1883	0.0270001	0	0.570431
																		1884	-0.0809999	-90	0.535072
																		1885	0.0235001	0	0.316881
																		1886	0.0215	0	0.537979
																		1887	-0.0804999	-90	0.711973
																		1888	0.0120001	0	0.902191
																		1889	0.0470001	30	0.410759
																		1890	0.0185001	0	1.12318
																		1891	0.0385	30	0.708842
																		1892	0.0425	30	0.567634
																		1893	0.00150004	0	0.762439
																		1894	0.0595	30	0.473643
																		1895	0.052	30	0.616417
																		1896	-0.00599995	-30	0.296404
																		1897	-0.00299995	-30	0.759418
																		1898	-0.0204999	-30	0.751359
																		1899	-0.0219999	-30	1.38232
																		1900	0.0305	30	0.80999
																		1901	0.0280001	0	0.609146
																		1902	0.0465001	30	0.590791
																		1903	-0.0285	-30	0.77844
																		1904	-0.0204999	-30	0.615746
																		1905	-0.0109999	-30	0.820285
																		1906	-0.0385	-60	0.657933
																		1907	-0.0279999	-30	0.553646
																		1908	0.0500001	30	0.74789
																		1909	-0.0219999	-30	0.566178
																		1910	-0.0244999	-30	0.888094
																		1911	-0.0285	-30	0.771726
																		1912	0.00200004	0	0.670798
																		1913	0.026	0	0.672364
																		1914	0.0155	0	0.851168
																		1915	-0.0159999	-30	0.441638
																		1916	-0.0265	-30	0.703918
																		1917	0.0320001	30	0.490652
																		1918	0.0535001	30	0.451376
																		1919	0.02	0	0.968097
																		1920	0.0420001	30	0.829906
																		1921	-0.035	-60	0.663858
																		1922	-0.019	-30	1.08738
																		1923	-0.0185	-30	1.47553
																		1924	0.0115	0	0.779334
																		1925	-0.0129999	-30	0.679191
																		1926	-0.0174999	-30	1.18394
																		1927	0.00100005	0	0.984545
																		1928	-0.0209999	-30	0.933522
																		1929	0.0430001	30	0.721821
																		1930	0.0540001	30	0.515379
																		1931	-0.03	-30	0.797348
																		1932	-0.0164999	-30	0.675722
																		1933	0.0130001	0	0.527911
																		1934	-0.0244999	-30	0.539996
																		1935	0.0315001	30	0.525
																		1936	0.0185	0	0.669229
																		1937	-0.00899995	-30	1.08861
																		1938	-0.0114999	-30	0.800369
																		1939	-0.0104999	-30	0.683103
																		1940	-0.027	-30	0.648975
																		1941	0.0255	0	0.996072
																		1942	0.0220001	0	0.899841
																		1943	0.0385	30	0.586542
																		1944	0.0470001	30	0.676841
																		1945	0.0245	0	1.22814
																		1946	-0.02	-30	0.743417
																		1947	-0.019	-30	0.732564
																		1948	-0.0335	-60	0.197826
																		1949	0.0235	0	0.572444
																		1950	0.0495	30	1.1215
																		1951	0.0125001	0	0.899394
																		1952	-0.0225	-30	1.24928
																		1953	0.02	0	0.637231
																		1954	-0.00399995	-30	0.906107
																		1955	0.0425	30	0.815141
																		1956	-0.00849995	-30	0.543802
																		1957	-0.0244999	-30	0.797461
																		1958	-0.035	-60	1.0923
																		1959	0.0180001	0	0.990254
																		1960	-0.0159999	-30	1.60868
																		1961	-0.00299995	-30	1.14578
																		1962	-0.022	-30	0.9813
																		1963	0.0165	0	0.720028
																		1964	-0.00399995	-30	0.694744
																		1965	-0.0144999	-30	0.957017
																		1966	0.0310001	30	0.521311
																		1967	0.0215	0	1.04519
																		1968	0.0290001	0	0.564279
																		1969	-0.0329999	-60	0.722045
																		1970	0.0145	0	0.454621
																		1971	-0.0294999	-30	0.702352
																		1972	0.0480001	30	0.682208
																		1973	-0.00949995	-30	1.37516
																		1974	0.0145001	0	1.11501
																		1975	0.0375	30	0.467601
																		1976	0.00250005	0	0.69631
																		1977	0.0225	0	1.21326
																		1978	-0.0204999	-30	0.953776
																		1979	0.0290001	0	1.38848
																		1980	-0.0265	-30	0.944261
																		1981	-0.027	-30	1.21728
																		1982	0.00850005	0	1.15216
																		1983	0.0405001	30	1.17734
																		1984	0.00150005	0	1.01711
																		1985	-0.0215	-30	1.12934
																		1986	0.037	30	1.0867
																		1987	-0.0314999	-60	1.80964
																		1988	-0.026	-30	1.19703
																		1989	0.0105	0	0.761768
																		1990	0.00700005	0	0.870975
																		1991	0.0175	0	1.14477
																		1992	-0.0104999	-30	1.15406
																		1993	0.0365	30	1.33309
																		1994	0.0345001	30	1.28632
																		1995	-0.0285	-30	1.42999
																		1996	0.0125001	0	0.915171
[truncated: 1,650 more rows]
