# Supplementary material for: Temporal cascade of frontal, motor and muscle processes underlying human action-stopping
Source: eLife. 2020 Mar 18;9:e50371. doi: 10.7554/eLife.50371 (PMC7159878; doi:10.7554/eLife.50371)
Supplement: Figure 5—figure supplement 5—source data 1. [file elife-50371-fig5-figsupp5-data1.xlsx]

## Sheet: Sheet1
Figure 5-figure supplement | Relationship between CancelTime and other burst parameters in study 4 and 5																								Figure 5-figure supplement 5d | Correlation of Burst Length and CancelTime in Study 5
Figure 5-figure supplement 5a | Correlation of Burst Height and CancelTime in Study 4								Figure 5-figure supplement 5b | Correlation of Burst Length and CancelTime in Study 4								Figure 5-figure supplement 5c | Correlation of Burst Height and CancelTime in Study 5								Subject No	Burst Length	CancelTime
																								1	206.916	222.08
Subject No	Burst Height	CancelTime						Subject No	Burst Length	CancelTime						Subject No	Burst Height	CancelTime						2	176.06	180.089
1	0.998477	196.173						1	213.542	196.173						1	0.663956	222.08						3	219.806	141.112
2	1.39924	174.914						2	394.531	174.914						2	0.303267	180.089						4	191.895	146.416
3	0.70568	116.38						3	236.328	116.38						3	0.628903	141.112						5	172.483	163.007
4	2.29308	217.731						4	163.53	217.731						4	0.685898	146.416						6	298.642	150.311
5	0.314079	207.625						5	158.691	207.625						5	0.497555	163.007						7	205.933	219.96
6	0.570879	152.146						6	146.484	152.146						6	0.808077	150.311						8	211.263	132.181
7	0.765225	202.406						7	205.859	202.406						7	0.525058	219.96						9	175.987	143.618
8	0.805057	125.72						8	196.094	125.72						8	0.63814	132.181						10	191.406	190.098
9	0.945392	163.326						9	210.379	163.326						9	0.660984	143.618						11	197.824	169.997
10	0.19373	138.104						10	180.575	138.104						10	0.485803	190.098						12	248.948	137.882
11	0.639234	165.405						11	201.172	165.405						11	0.894862	169.997						13	362.915	156.887
Mean	0.875461	169.085						Mean	209.744	169.085						12	0.700077	137.882						Mean	220.006	165.664
SD	0.572576	34.1783						SD	66.8861	34.1783						13	0.929307	156.887						SD	54.8618	29.7585
																Mean	0.647837	165.664
																SD	0.171666	29.7585
