# Supplementary material for: Temporal cascade of frontal, motor and muscle processes underlying human action-stopping
Source: eLife. 2020 Mar 18;9:e50371. doi: 10.7554/eLife.50371 (PMC7159878; doi:10.7554/eLife.50371)
Supplement: Figure 5—source data 1. [file elife-50371-fig5-data1.xlsx]

## Sheet: Sheet1
Figure 5 | Relationship between scalp EEG beta bursts and CancelTime for study 4 and 5
Figure 5b: Burst% for Successful Stops, Failed Stops and Correct Go for Study 4									Figure 5c: Burst% for Successful Stops, Failed Stops and Correct Go for Study 5									Figure 5d: Correlation between BurstTime and CancelTime for Study 4 and 5 (Study 4: Subjects 1-11, Study 5: Subjects 12-24)
Subject No	SS BaseWin	SS Stop Win	FS Base Win	FS Stop Win	CG Base Win	CG Stop Win			Subject No	SS BaseWin	SS Stop Win	FS Base Win	FS Stop Win	CG Base Win	CG Stop Win		Subject No	BurstTime	CancelTime
1	7.10263	7.07795	4.63948	6.09756	2.667	4.16714			1	5.12143	8.88889	4.50781	12.3473	4.90456	6.85095		1	132.161	196.173
2	6.67486	8.81543	5.06757	2.7686	6.48283	5.08049			2	15.4267	18.1569	14.3937	15.0684	12.7578	13.0506		2	112.63	174.914
3	3.67325	12.5858	12.8655	19.4508	6.96045	12.202			3	16.2124	20.0898	15.5568	16.1541	13.5106	12.6296		3	105.957	116.38
4	10.2834	17.7533	6.98545	10.8915	11.977	8.8258			4	10.119	30.0164	9.26932	26.211	9.67902	13.0959		4	134.233	217.731
5	14.5564	17.0187	16.5772	10.7862	10.8614	12.0689			5	16.4189	21.5141	12.8044	22.2359	10.651	12.3775		5	128.418	207.625
6	10.8402	9.86618	8.72585	19.0669	11.4717	14.0526			6	8.46275	12.927	3.71863	7.45255	6.30909	10.4535		6	93.75	152.146
7	5.52683	13.6235	10.3994	7.2	3.50057	6.04887			7	7.98891	9.59421	8.24592	13.1535	8.44578	10.0887		7	152.344	202.406
8	9.013	10.8669	6.19681	6.75824	6.3283	8.44237			8	11.2761	10.6392	6.32184	9.89177	7.39943	9.65783		8	84.7656	125.72
9	3.73178	15.6633	3.03365	7.4083	3.88704	6.97674			9	11.134	11.5479	7.40937	10.7825	9.38349	8.8446		9	120.257	163.326
10	15.9681	26.052	21.0379	14.7287	17.4856	18.1095			10	3.11111	6.30237	2.97802	8.46784	5.17813	8.9749		10	68.3594	138.104
11	21.4173	21.1631	17.3003	7.9646	13.7833	9.38989			11	15.857	18.4047	16.8513	18.407	16.1428	15.0596		11	136.393	165.405
Mean	9.88979	14.5897	10.2572	10.2838	8.6732	9.57857			12	6.47975	11.1994	8.84682	10.4784	6.16438	8.40159		12	171.645	222.08
SD	5.54202	5.6793	5.93972	5.39578	4.75683	4.20137			13	18.958	30.966	19.1637	28.979	20.9986	26.9209		13	106.864	180.089
									Mean	11.2743	16.1728	10.0052	15.3561	10.1173	12.0313		14	126.9	141.112
									SD	4.9638	7.87567	5.26838	6.82618	4.70894	5.04088		15	149.251	146.416
																	16	124.696	163.007
																	17	128.627	150.311
																	18	127.441	219.96
																	19	102.214	132.181
																	20	81.7229	143.618
																	21	180.664	190.098
																	22	130.673	169.997
																	23	114.784	137.882
																	24	126.221	156.887
																	Mean	122.541	167.232
																	SD	26.3476	31.1923
