# Supplementary material for: Temporal cascade of frontal, motor and muscle processes underlying human action-stopping
Source: eLife journal article supplement (doi:10.7554/elife.50371), 2020-03-18

## Independent race model without ballistic stage

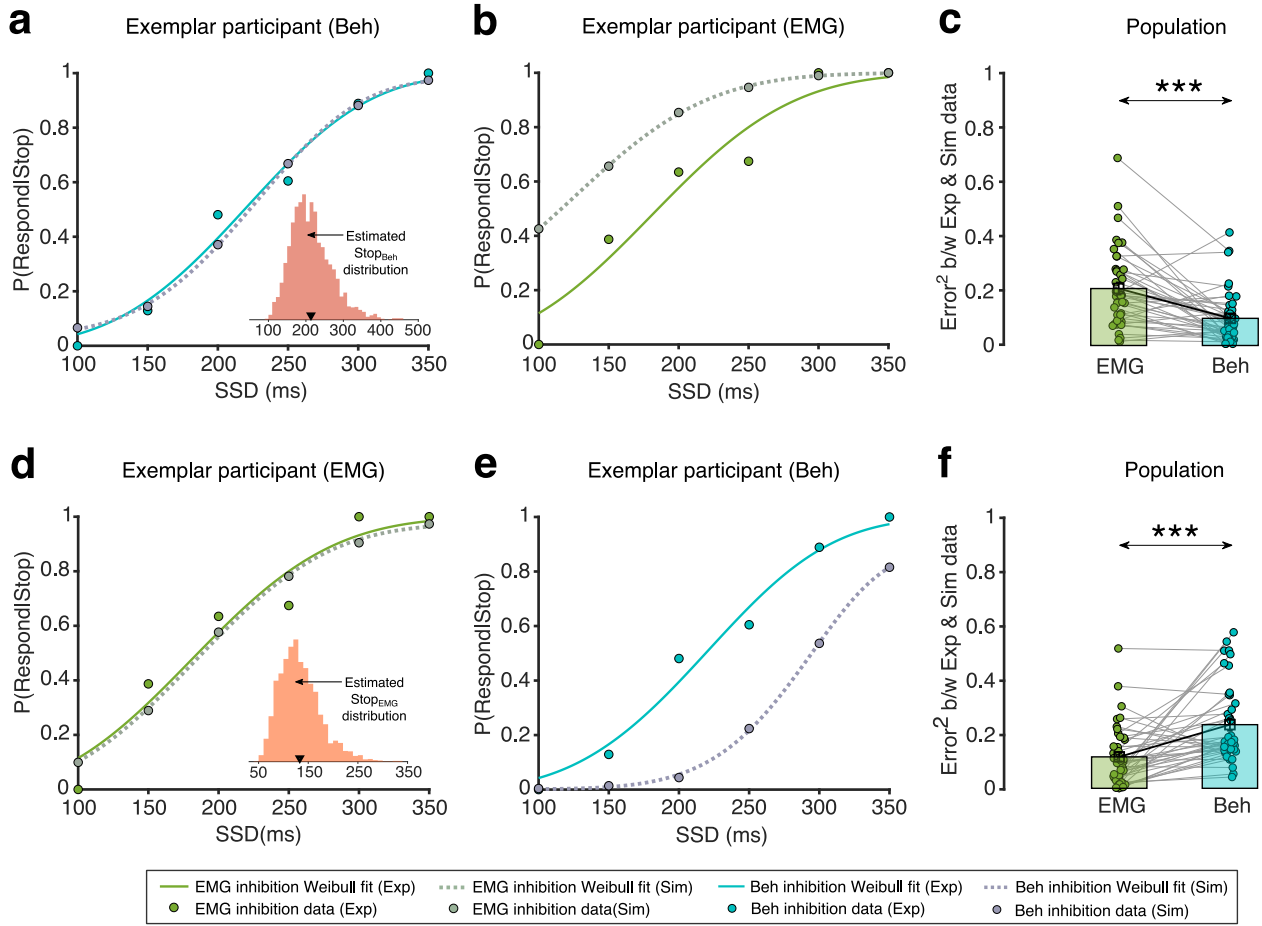

## Independent race model with a ballistic stage

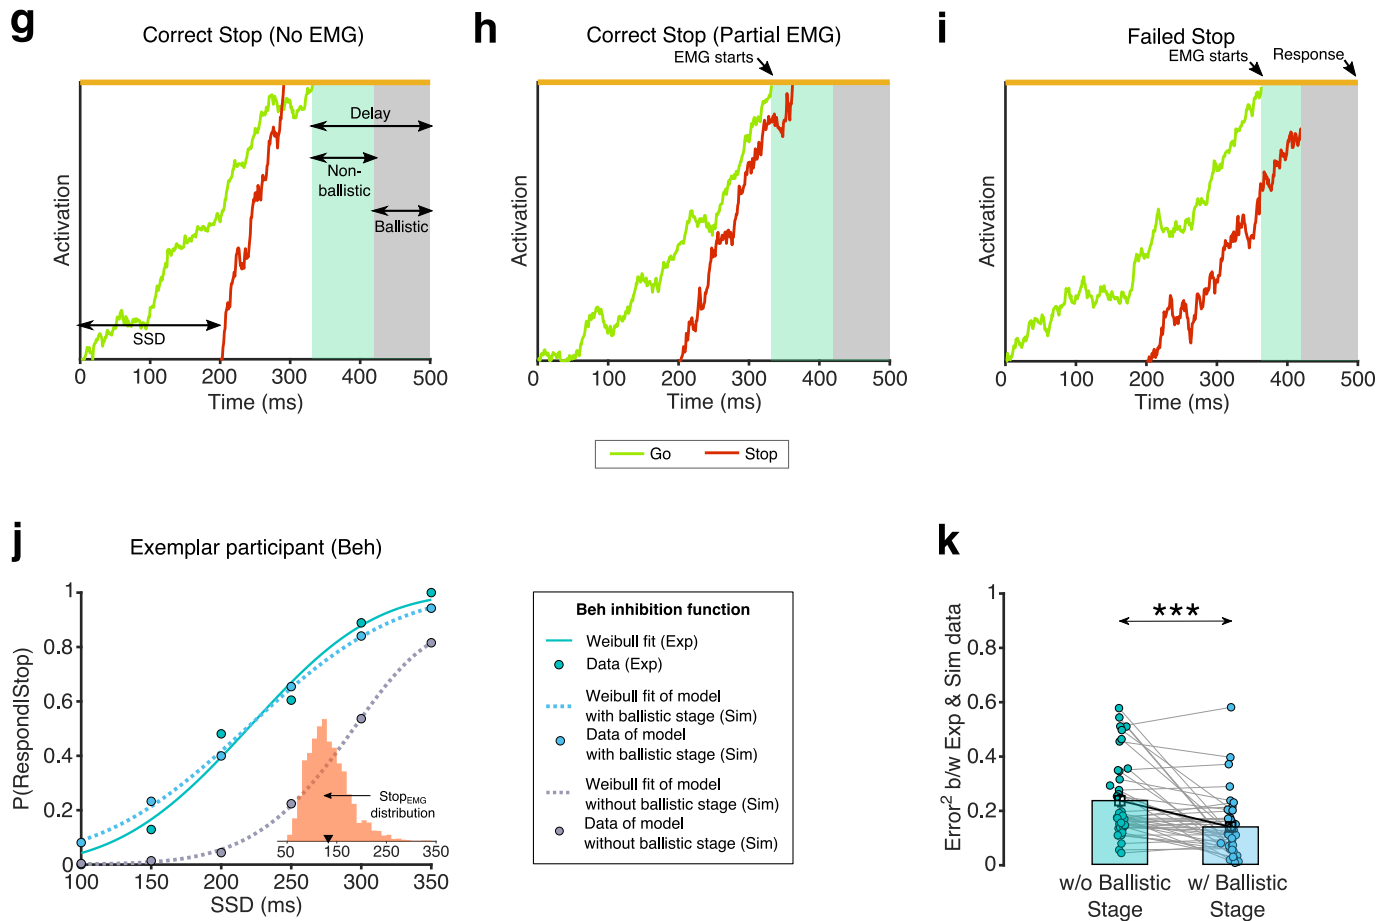

Supplement: supp [file elife_poa_e50371_Figure_3_figure_supplement_1.pdf › elife_poa_e50371_Figure_3_figure_supplement_1.pdf]
