# Supplementary material for: Temporal cascade of frontal, motor and muscle processes underlying human action-stopping
Source: eLife. 2020 Mar 18;9:e50371. doi: 10.7554/eLife.50371 (PMC7159878; doi:10.7554/eLife.50371)
Supplement: Table 1—source data 1. [file elife-50371-table1-data1.xlsx]

## Sheet: Sheet1
Table 1 | Behavior in the Stop-signal task in all 5 studies
Study 1
Subject No	Go RTBeh	Failed Stop RTBeh	Correct Go%	Correct Stop%	Mean SSD	SSRTBeh
1	519.689	471.28	99.3333	52.518	335.612	179.643
2	436.31	398.324	99.1111	50	207.333	226.819
3	545.35	458.66	98.4444	53.6232	322.826	193.673
4	435.487	399.336	99.7778	51.3333	215.333	212.212
5	419.91	371.168	96.6667	50.6667	194	203.058
6	528.391	437.254	97.7778	51.0067	286.577	211.936
7	468.597	418.726	96.4444	49.3333	210.667	243.784
8	431.325	398.255	99.5556	51.3333	186.667	233.06
9	416.862	371.614	86.6667	47.3333	137.667	255.03
10	494.34	436.43	98	48.9933	276.51	196.44
Mean	469.626	416.105	97.1778	50.6141	237.319	215.565
SD	48.6527	34.3788	3.86898	1.80366	64.4643	23.8112
Study 2
Subject No	Go RTBeh	Failed Stop RTBeh	Correct Go%	Correct Stop%	Mean SSD	SSRTBeh
1	427.082	369.643	98.6667	52.027	210.811	191.111
2	485.895	436.214	97.7778	50	246.959	200.896
3	580.641	504.431	97.1111	56.1151	353.957	236.207
4	436.316	413.81	96.4444	49.3333	254	167.686
5	598.651	527.162	98	54.4218	360.204	249.529
6	519.248	468.39	98.8889	53.4722	310.069	201.182
7	605.939	591.365	97.7778	54.2857	435.714	174.215
8	501.835	453.015	98.2222	50	284	211.516
9	573.382	549.874	98.8889	59.5238	397.222	187.522
10	640.282	591.184	96.6667	57.1429	453.214	190.332
11	437.12	385.56	100	50.6667	216	212.92
12	407.251	361.406	99.5556	46.3087	171.141	213.478
13	377.635	342.479	98	48	149.667	207.706
14	370.196	339.179	98	48.6667	129.333	231.763
15	338.315	318.153	96.6667	42.6667	88.3333	237.6
16	479.139	451.858	97.5556	48.9933	245.973	221.984
17	586.971	526.127	99.1111	55.8621	382.069	207.572
18	570.866	509.549	99.1111	54.2857	382.857	176.186
19	543.988	462.458	99.1111	51.6779	323.49	207.447
20	526.596	453.565	94.6667	51.0204	310.884	205.995
21	563.039	522.682	98.6667	55.6338	367.606	197.924
22	460.034	415.249	99.7778	50.3356	230.537	212.248
23	399.47	360.46	94	50.3401	199.32	178.884
24	571.63	513.105	99.1111	53.4247	354.795	209.306
25	387.643	348.732	99.5556	50	162	218.394
26	527.985	491.413	99.7778	51.7241	333.103	190.514
27	461.178	403.54	98.8889	48.9655	255.172	177.277
28	377.964	340.608	99.3333	48.6667	144	220.346
29	463.67	421.75	97.3333	50.3356	246.98	206.208
30	458.526	385.053	97.7778	49.3243	206.419	228.387
31	636.541	589.136	99.7778	56.338	450	188.078
32	473.177	443.469	98.4444	54.2857	300	169.939
Mean	493.381	446.582	98.2083	51.6826	279.87	204.073
SD	84.2937	80.0164	1.41217	3.51448	98.148	20.7679
Study 3
Subject No	Go RTBeh	Failed Stop RTBeh	Correct Go%	Correct Stop%	Mean SSD	SSRTBeh
1	311	310	96	39	100	214
2	325	316	95	49	150	194
3	410	399	98	46	100	287
4	385	363	100	49	200	195
5	365	358	100	48	150	221
6	420	391	98	51	200	208
7	396	382	100	49	200	173
8	356	328	98	49	150	215
9	442	393	97	50	250	207
10	377	354	99	48	150	231
11	373	355	98	48	150	223
12	425	393	100	50	200	230
13	388	356	98	49	200	193
14	420	394	97	51	200	198
15	573	480	98	55	350	221
16	545	488	97	54	350	199
17	482	417	97	48	250	213
Mean	411.353	381	98	49	197.059	213.059
SD	69.4289	48.9809	1.45774	3.39116	71.743	24.3528
	16.839	11.8796	0.353553	0.822478	17.4002	5.90642
			Study 4
Subject No	Go RTBeh	Failed Stop RTBeh	Correct Go%	Correct Stop%	Mean SSD	SSRTBeh
1	445.818	405.306	99.5833	50	181.25	237.872
2	412.888	350.58	98.75	47.5	143.125	234.984
3	466.636	428.207	99.5833	48.75	280	177.183
4	387.567	379.3	99.5833	48.75	124.375	259.25
5	341.043	329.399	95	37.5	81.875	235.267
6	389.649	369.553	99.5833	52.5	177.5	199.199
7	458.037	375.565	96.6667	46.25	175.625	241.813
8	379.328	337.853	99.1667	46.8354	181.013	175.395
9	423.45	364.546	99.1667	50	190	217.381
10	509.324	454.585	98.75	53.2468	323.377	166.236
11	486.247	426.885	99.1667	48.75	246.25	219.2
Mean	427.272	383.798	98.6364	48.1893	191.308	214.889
SD	50.9884	40.1713	1.46831	4.14717	69.1012	31.0802
Study 5
Subject No	Go RTBeh	Failed Stop RTBeh	Correct Go%	Correct Stop%	Mean SSD	SSRTBeh
1	407.79	381.316	99.0972	48.125	131.979	262.138
2	405.729	377.972	98.6806	50.1044	201.566	185.151
3	410.352	372.742	98.8889	49.8956	192.276	202.624
4	410.363	386.106	98.4722	49.7917	186.458	215.128
5	388.305	354.46	99.9306	49.7908	159.623	216.141
6	378.257	349.62	99.8611	49.8956	163.674	202.416
7	449.459	407.372	98.0556	49.5833	184.792	244.591
8	374.912	338.1	98.2639	49.4759	167.191	191.462
9	406.817	372.63	98.0556	49.5833	168.438	224.547
10	385.088	357.777	99.7222	49.375	134.062	237.211
11	396.324	345.271	98.8889	48.9583	150.625	222.019
12	425.453	383.793	99.5833	50.5263	206.526	207.865
13	421.448	380.768	99.0278	49.7917	165.833	238.499
Mean	404.638	369.841	98.9637	49.6075	170.234	219.215
SD	20.6232	19.5861	0.657869	0.580972	23.4585	22.1008
