# Supplementary material for: Temporal cascade of frontal, motor and muscle processes underlying human action-stopping
Source: eLife. 2020 Mar 18;9:e50371. doi: 10.7554/eLife.50371 (PMC7159878; doi:10.7554/eLife.50371)
Supplement: Table 2—source data 1. [file elife-50371-table2-data1.xlsx]

## Sheet: Sheet1
Table 2 | BEESTS estimates for study 1 and 2
Subject No	Mean Go RTBeh	SD Go RTBeh	Mean SSRT	SD SSRT	%Trigger Failures
1	522.233	109.101	188.315	40.2575	1.79016
2	431.622	63.3109	218.369	29.7975	4.05379
3	546.788	142.687	203.883	38.3598	1.51226
4	431.621	62.232	211.387	30.9962	1.95673
5	395.385	67.8109	192.798	30.4242	9.24341
6	500.803	107.886	195.249	40.8873	2.98564
7	458.824	81.2941	240.85	28.5414	5.08254
8	417.768	46.619	224.463	36.903	4.92811
9	400.323	86.8451	263.115	133.983	6.81362
10	485.603	82.4513	209.291	26.049	1.92046
11	415.369	80.2384	195.01	30.6769	1.55504
12	481.74	142.109	220.419	193.354	6.10997
13	585.451	149.301	211.168	54.5359	2.35493
14	436.072	72.8355	187.435	30.027	2.04249
15	603.569	133.511	226.135	44.425	2.16216
16	517.841	121.922	189.682	108.277	3.20852
17	492.209	73.5286	204.597	30.2674	3.0709
18	586.057	145.786	162.862	124.645	3.36995
19	646.188	125.504	183.185	27.7627	1.26183
20	433.612	75.2613	206.863	14.4421	1.28187
21	399.148	72.9579	221.762	47.5911	10.8529
22	366.161	59.7938	212.134	92.0954	7.29181
23	360.247	52.6066	227.972	58.1606	9.20349
24	334.8	39.2356	244.727	44.5745	18.5787
25	611.37	161.346	180.823	27.0649	2.50064
26	472.828	74.4288	211.771	62.9579	14.9458
27	590.462	124.06	195.207	26.5788	2.42475
28	569.312	101.731	171.737	28.8766	3.65131
29	548.075	153.473	206.077	24.0832	1.55451
30	518.352	101.551	192.742	24.7066	1.35972
31	562.968	94.0752	184.739	21.2421	4.09962
32	448.742	71.2156	209.977	59.5067	6.3185
33	388.817	78.0905	185.207	42.1388	4.35561
34	564.894	86.8756	201.814	29.5184	1.81264
35	377.687	53.2732	211.641	41.672	3.47717
36	529.315	81.6701	194.531	37.168	3.23341
37	451.295	95.6125	192.898	63.9896	3.62747
38	370.786	60.0852	224.14	51.8947	4.88432
39	454.822	69.8611	205.912	29.8617	2.38281
40	452.743	116.83	229.907	43.2796	2.43252
41	643.694	124.863	185.794	28.1196	1.66921
42	478.13	92.821	180.91	26.04	1.37487
Mean	482.946	93.7308	204.94	47.7555	4.25562
SD	82.5915	32.1798	20.3143	34.9959	3.68557
