# Supplementary figures and images for: Temporal cascade of frontal, motor and muscle processes underlying human action-stopping
Source: eLife journal article supplement (doi:10.7554/elife.50371), 2020-03-18

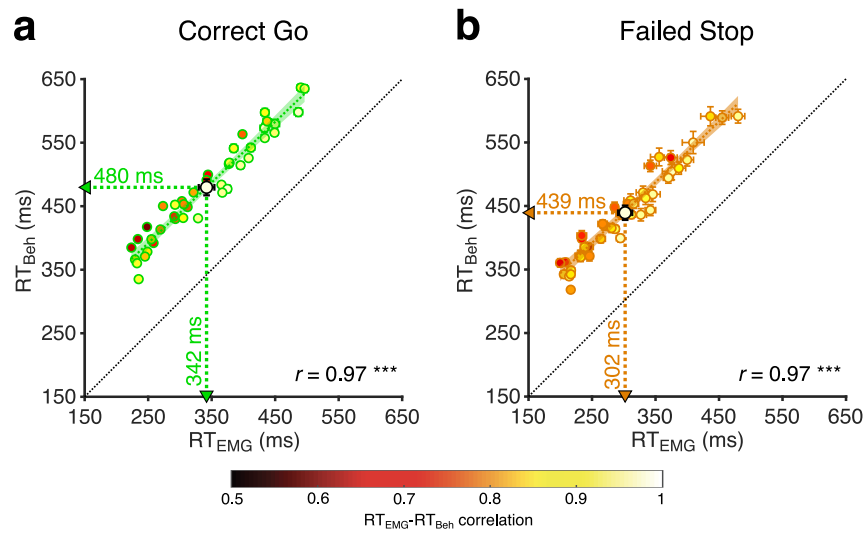

Supplement: supp [file elife_poa_e50371_Figure_1_figure_supplement_1.pdf › elife_poa_e50371_Figure_1_figure_supplement_1.pdf]

Partial EMG trials

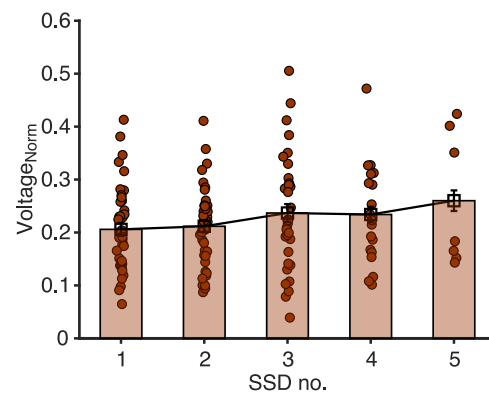

Supplement: supp [file elife_poa_e50371_Figure_3_figure_supplement_2.pdf › elife_poa_e50371_Figure_3_figure_supplement_2.pdf]

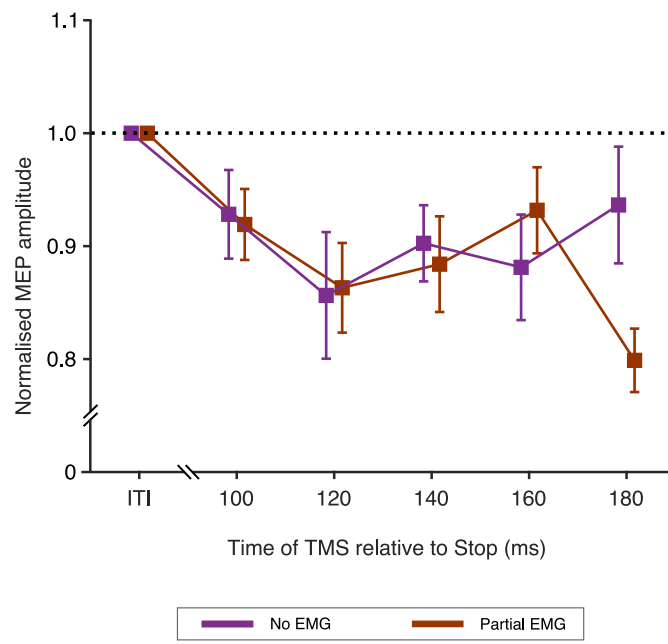

Supplement: supp [file elife_poa_e50371_Figure_4_figure_supplement_1.pdf › elife_poa_e50371_Figure_4_figure_supplement_1.pdf]

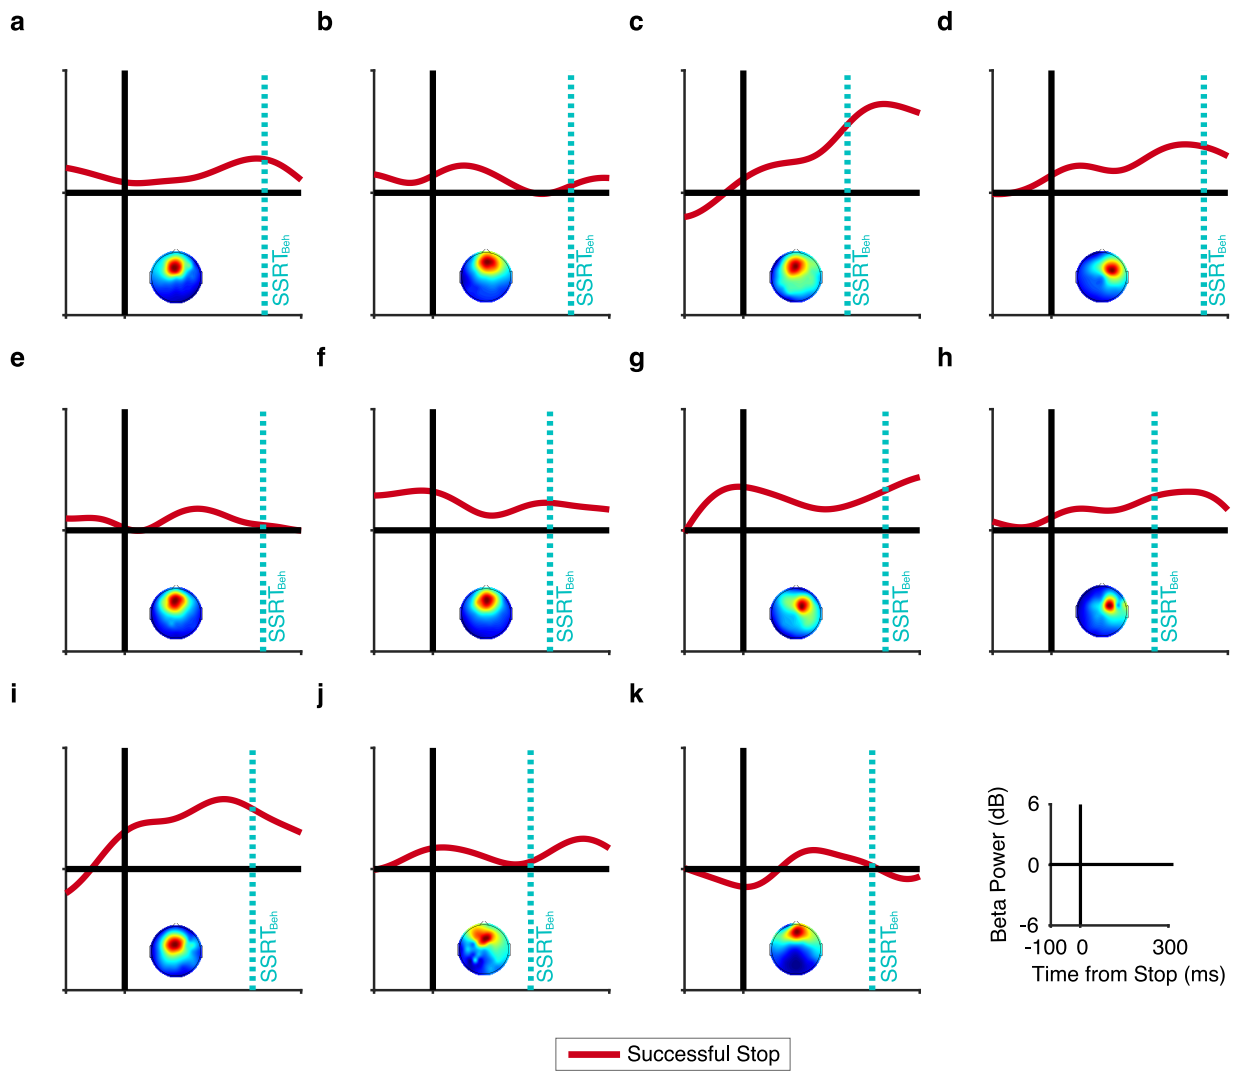

Supplement: supp [file elife_poa_e50371_Figure_5_figure_Supplement_1.pdf › elife_poa_e50371_Figure_5_figure_Supplement_1.pdf]

**a**

Sagittal

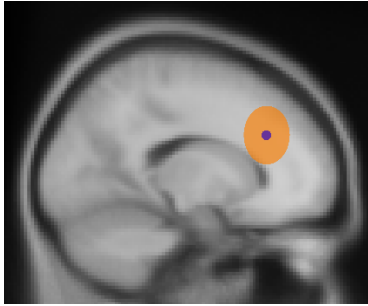

**b**

Top

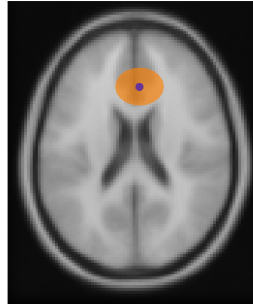

**c**

Coronal

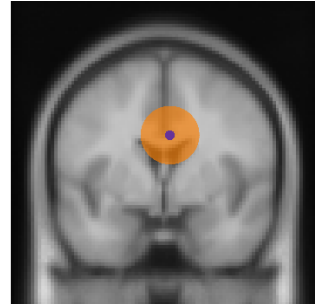

Supplement: supp [file elife_poa_e50371_Figure_5_figure_supplement_2.pdf › elife_poa_e50371_Figure_5_figure_supplement_2.pdf]

**a** Trial-by-Trial Bursts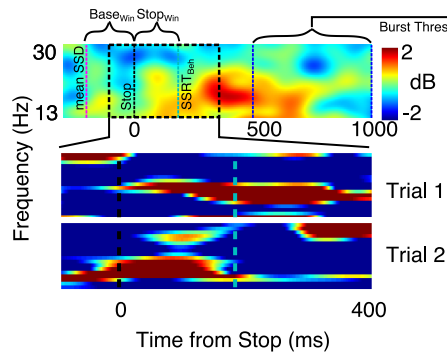**b** Burst Threshold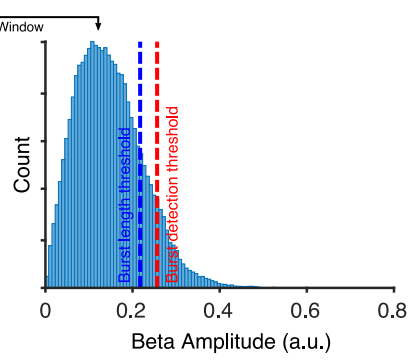**c** Burst Raster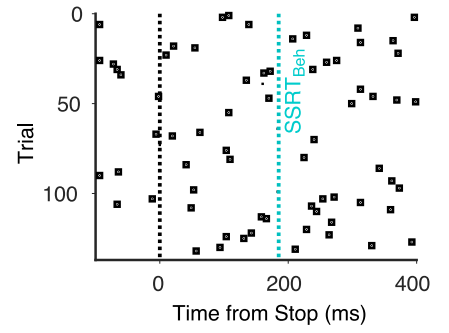

Supplement: supp [file elife_poa_e50371_Figure_5_figure_supplement_3.pdf › elife_poa_e50371_Figure_5_figure_supplement_3.pdf]

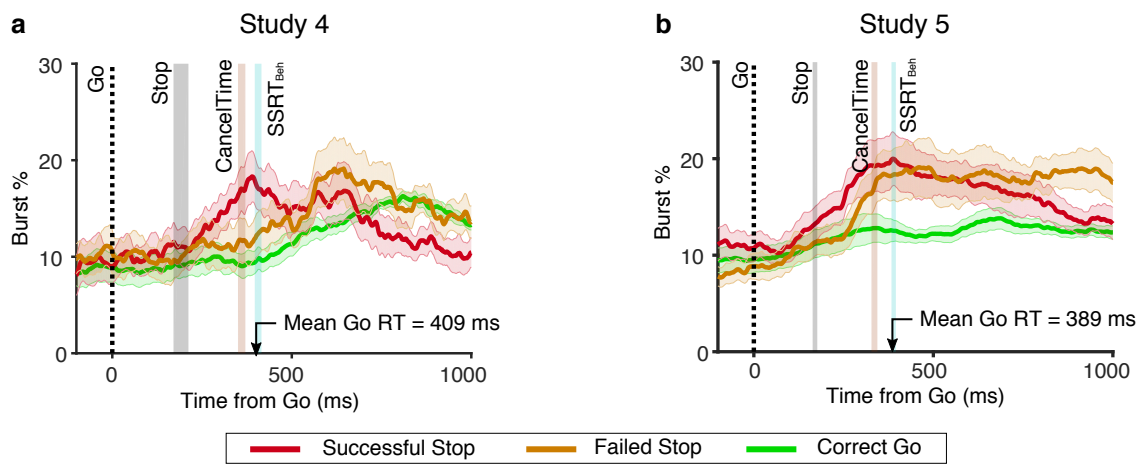

Supplement: supp [file elife_poa_e50371_Figure_5_figure_supplement_4.pdf › elife_poa_e50371_Figure_5_figure_supplement_4.pdf]

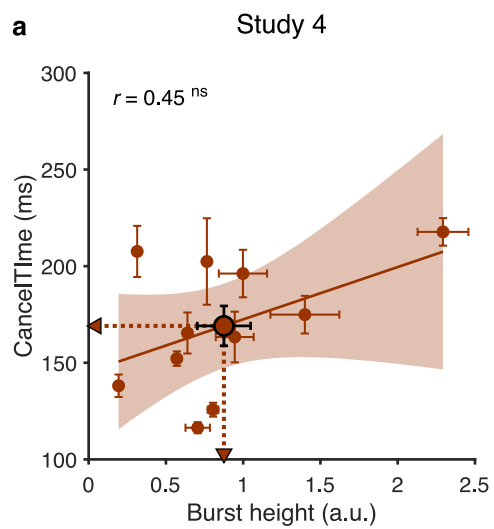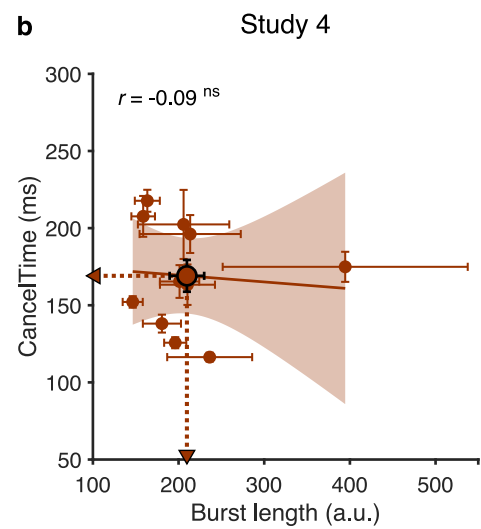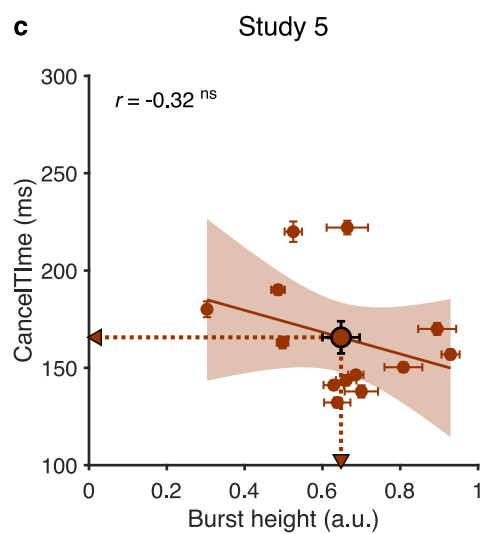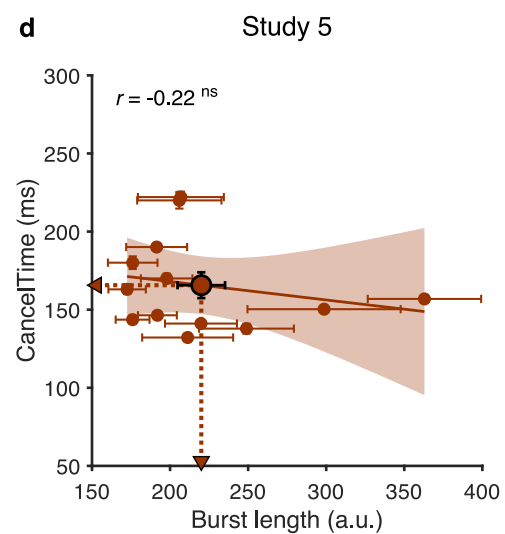

Supplement: supp [file elife_poa_e50371_Figure_5_figure_supplement_5.pdf › elife_poa_e50371_Figure_5_figure_supplement_5.pdf]
